# Supplementary material
Source: PubMed Central journal article supplement (PMC11234871)
Supplement: NIHMS2006189-supplement-Web_Appendix.pdf [file NIHMS2006189-supplement-Web_Appendix.pdf]

**Combining Multiple Biomarkers Linearly to Minimize  
the Euclidean Distance of the Closest Point on the  
ROC Surface to the Perfection Corner in  
Trichotomous Settings**

by Brian R. Mosier and Leonidas E. Bantis

# Web -Appendix A (Proof for a Dominant ROC Surface.)

Proof. Let  $X_{1i}$ ,  $X_{2j}$ , and  $X_{3k}$  be the marker values for each of the three groups. Suppose they are multivariate normally distributed, so that  $X_1 \sim N(\boldsymbol{\mu}_1, \boldsymbol{\Sigma})$ ,  $X_2 \sim N(\boldsymbol{\mu}_2, \boldsymbol{\Sigma})$ ,  $X_3 \sim N(\boldsymbol{\mu}_3, \boldsymbol{\Sigma})$  and  $\boldsymbol{\mu}_2 - \boldsymbol{\mu}_1 = \boldsymbol{\mu}_3 - \boldsymbol{\mu}_2 = \boldsymbol{\delta}$ .

Then, when comparing groups 1 vs 2, 2 vs 3, and 1 vs 3, the best linear combination coefficient is  $\boldsymbol{\beta} \propto \boldsymbol{\delta}^T \boldsymbol{\Sigma}^{-1}$ , (Su 1993). The best linear combination implies that for every value of a given specificity, the sensitivity is higher than (or equal to) the sensitivity obtained by any other linear combination. Similarly, for a given value of specificity.

Let  $F_1$ ,  $F_2$ , and  $F_3$  be the CDFs of the combined scores using the best linear combination. Let  $F_1^*$ ,  $F_2^*$ , and  $F_3^*$  represent the CDFs of any other linear combination of the scores. Note that when focus is on the two class setting with random variables  $X$  and  $Y$  for the healthy and the diseased groups respectively, then functional form of the ROC curve is  $S_Y(S_X^{-1}(t))$ . We assume there is stochastic ordering  $Y > X$ . An ROC curve is dominant if

$$S_Y(S_X^{-1}(t)) \geq S_Y^*(S_X^{*-1}(t)), \quad (1)$$

for all  $t$ , or equivalently, if

$$F_X(F_Y^{-1}(1-t)) \geq F_X^*(F_Y^{*-1}(1-t)) \quad (2)$$

for all  $t$ .

Turning now to the three class setting we have (by using (1)) that for all  $p$ :

$$1 - F_2(F_1^{-1}(p)) \geq 1 - F_2^*(F_1^{*-1}(p))$$

and so,

$$F_2(F_1^{-1}(TCR_1)) \leq F_2^*(F_1^{*-1}(TCR_1)).$$

Note that for all  $p$ , we have that (using (2)):

$$F_2(F_3^{-1}(1-p)) \geq F_2^*(F_3^{*-1}(1-p))$$

and so,

$$F_2(F_3^{-1}(1 - TCR_3)) \geq F_2^*(F_3^{*-1}(1 - TCR_3))$$

Note that the functional form of the ROC surface is  $S = F_2(F_3^{-1}(1 - TCR_3)) - F_2(F_1^{-1}(TCR_1))$ .

Therefore,

$$S = \left( F_2(F_3^{-1}(1 - TCR_3)) - F_2(F_1^{-1}(TCR_1)) \right) \geq \left( F_2^*(F_3^{*-1}(1 - TCR_3)) - F_2^*(F_1^{*-1}(TCR_1)) \right),$$

and so  $\boldsymbol{\beta} \propto \boldsymbol{\delta}^T \boldsymbol{\Sigma}^{-1}$  provides a linear combination of biomarker scores with a dominant ROC surface.

Web -Appendix B (Simulation Results for Scenarios  
Generated from Normal Distributions with a Dominant  
ROC Surface)

**Table B.1**

The table provides results for the normal scenarios with  $\Sigma = 0.5I + 0.5J$ . The table provides the bias, variance, and MSE for  $\beta_1$ ,  $\beta_2$  and  $\beta_3$  for each of the explored approaches when using the Euclidean distance as the objective function.

| Method    | Approach | $n_1, n_2, n_3$ | $\beta_1$ |          |        | $\beta_2$ |          |        | $\beta_3$ |          |        |
|-----------|----------|-----------------|-----------|----------|--------|-----------|----------|--------|-----------|----------|--------|
|           |          |                 | Bias      | Variance | MSE    | Bias      | Variance | MSE    | Bias      | Variance | MSE    |
| Euclidean | Logistic | 30,30,30        | -0.0173   | 0.1094   | 0.1097 | -0.0365   | 0.0873   | 0.0886 | -0.1129   | 0.0420   | 0.0547 |
|           |          | 50,50,50        | 0.0056    | 0.0821   | 0.0821 | -0.0255   | 0.0691   | 0.0697 | -0.0707   | 0.0225   | 0.0275 |
|           |          | 100,100,100     | 0.0008    | 0.0468   | 0.0468 | 0.0058    | 0.0430   | 0.0430 | -0.0287   | 0.0062   | 0.0070 |
|           |          | 200,200,200     | 0.0071    | 0.0253   | 0.0254 | 0.0104    | 0.0269   | 0.0270 | -0.0089   | 0.0013   | 0.0014 |
|           |          | 200,50,50       | 0.0122    | 0.0567   | 0.0569 | -0.0105   | 0.0492   | 0.0493 | -0.0363   | 0.0090   | 0.0103 |
|           | Yan      | 30,30,30        | -0.0440   | 0.2071   | 0.2090 | -0.1329   | 0.1679   | 0.1856 | -0.2145   | 0.1051   | 0.1511 |
|           |          | 50,50,50        | -0.0003   | 0.1768   | 0.1768 | -0.0654   | 0.1337   | 0.1380 | -0.1677   | 0.0721   | 0.1003 |
|           |          | 100,100,100     | -0.0083   | 0.1179   | 0.1180 | -0.0122   | 0.0850   | 0.0852 | -0.0900   | 0.0330   | 0.0411 |
|           |          | 200,200,200     | 0.0254    | 0.0768   | 0.0775 | 0.0264    | 0.0620   | 0.0627 | -0.0487   | 0.0139   | 0.0162 |
|           |          | 200,50,50       | 0.0030    | 0.1608   | 0.1608 | -0.0554   | 0.1200   | 0.1231 | -0.1430   | 0.0678   | 0.0883 |
|           | Normal   | 30,30,30        | -0.0183   | 0.1185   | 0.1188 | -0.0529   | 0.0976   | 0.1004 | -0.1329   | 0.0505   | 0.0682 |
|           |          | 50,50,50        | 0.0015    | 0.0925   | 0.0925 | -0.0344   | 0.0777   | 0.0788 | -0.0836   | 0.0275   | 0.0345 |
|           |          | 100,100,100     | -0.0013   | 0.0522   | 0.0522 | 0.0051    | 0.0473   | 0.0474 | -0.0334   | 0.0075   | 0.0087 |
|           |          | 200,200,200     | 0.0060    | 0.0295   | 0.0296 | 0.0083    | 0.0289   | 0.0290 | -0.0116   | 0.0019   | 0.0021 |
|           |          | 200,50,50       | 0.0106    | 0.0793   | 0.0794 | -0.0319   | 0.0671   | 0.0681 | -0.0614   | 0.0174   | 0.0211 |
|           | Stepwise | 30,30,30        | -0.2779   | 0.1794   | 0.2566 | -0.3183   | 0.1814   | 0.2827 | -0.2988   | 0.1480   | 0.2373 |
|           |          | 50,50,50        | -0.2657   | 0.1629   | 0.2335 | -0.2421   | 0.1537   | 0.2123 | -0.2468   | 0.1108   | 0.1717 |
|           |          | 100,100,100     | -0.2393   | 0.1510   | 0.2083 | -0.2019   | 0.1319   | 0.1727 | -0.1754   | 0.0707   | 0.1014 |
|           |          | 200,200,200     | -0.2071   | 0.1342   | 0.1771 | -0.1634   | 0.1011   | 0.1278 | -0.1205   | 0.0394   | 0.0539 |
|           |          | 200,50,50       | -0.2622   | 0.1624   | 0.2311 | -0.2315   | 0.1548   | 0.2084 | -0.2289   | 0.0972   | 0.1496 |
| Youden    | Logistic | 30,30,30        | -0.0173   | 0.1094   | 0.1097 | -0.0365   | 0.0873   | 0.0886 | -0.1129   | 0.0420   | 0.0547 |
|           |          | 50,50,50        | 0.0056    | 0.0821   | 0.0821 | -0.0255   | 0.0691   | 0.0697 | -0.0707   | 0.0225   | 0.0275 |
|           |          | 100,100,100     | 0.0008    | 0.0468   | 0.0468 | 0.0058    | 0.0430   | 0.0430 | -0.0287   | 0.0062   | 0.0070 |
|           |          | 200,200,200     | 0.0071    | 0.0253   | 0.0254 | 0.0104    | 0.0269   | 0.0270 | -0.0089   | 0.0013   | 0.0014 |
|           |          | 200,50,50       | 0.0122    | 0.0567   | 0.0569 | -0.0105   | 0.0492   | 0.0493 | -0.0363   | 0.0090   | 0.0103 |
|           | Yan      | 30,30,30        | -0.0278   | 0.1939   | 0.1947 | -0.1044   | 0.1622   | 0.1731 | -0.2233   | 0.1053   | 0.1551 |
|           |          | 50,50,50        | 0.0069    | 0.1644   | 0.1645 | -0.0703   | 0.1262   | 0.1311 | -0.1612   | 0.0692   | 0.0952 |
|           |          | 100,100,100     | -0.0042   | 0.1125   | 0.1125 | -0.0080   | 0.0813   | 0.0813 | -0.0857   | 0.0305   | 0.0378 |
|           |          | 200,200,200     | 0.0217    | 0.0771   | 0.0775 | 0.0267    | 0.0596   | 0.0603 | -0.0483   | 0.0139   | 0.0162 |
|           |          | 200,50,50       | -0.2042   | 0.1512   | 0.1929 | -0.1504   | 0.1216   | 0.1443 | -0.1268   | 0.0575   | 0.0736 |
|           | Normal   | 30,30,30        | -0.0128   | 0.1162   | 0.1164 | -0.0416   | 0.0912   | 0.0929 | -0.1206   | 0.0445   | 0.0591 |
|           |          | 50,50,50        | 0.0055    | 0.0856   | 0.0856 | -0.0286   | 0.0727   | 0.0735 | -0.0742   | 0.0237   | 0.0292 |
|           |          | 100,100,100     | -0.0010   | 0.0475   | 0.0475 | 0.0054    | 0.0447   | 0.0448 | -0.0289   | 0.0062   | 0.0071 |
|           |          | 200,200,200     | 0.0061    | 0.0260   | 0.0260 | 0.0106    | 0.0270   | 0.0271 | -0.0095   | 0.0015   | 0.0016 |
|           |          | 200,50,50       | 0.0146    | 0.0701   | 0.0703 | -0.0231   | 0.0594   | 0.0599 | -0.0499   | 0.0137   | 0.0162 |
|           | Stepwise | 30,30,30        | -0.1707   | 0.1857   | 0.2149 | -0.2207   | 0.1808   | 0.2295 | -0.2828   | 0.1371   | 0.2170 |
|           |          | 50,50,50        | -0.1191   | 0.1698   | 0.1840 | -0.1709   | 0.1551   | 0.1843 | -0.2508   | 0.1088   | 0.1717 |
|           |          | 100,100,100     | -0.1245   | 0.1285   | 0.1440 | -0.1044   | 0.1124   | 0.1233 | -0.1411   | 0.0563   | 0.0762 |
|           |          | 200,200,200     | -0.0914   | 0.1048   | 0.1131 | -0.0432   | 0.0824   | 0.0843 | -0.0959   | 0.0305   | 0.0397 |
|           |          | 200,50,50       | -0.1084   | 0.1544   | 0.1661 | -0.1220   | 0.1332   | 0.1481 | -0.1965   | 0.0809   | 0.1195 |

**Table B.2**

The table provides results for the normal scenarios with  $\Sigma = 0.3I + 0.7J$ . The table provides the bias, variance, and MSE for  $\beta_1$ ,  $\beta_2$  and  $\beta_3$  for each of the explored approaches when using the Euclidean distance as the objective function.

| Method    | Approach | $n_1, n_2, n_3$ | $\beta_1$ |          |        | $\beta_2$ |          |        | $\beta_3$ |          |        |
|-----------|----------|-----------------|-----------|----------|--------|-----------|----------|--------|-----------|----------|--------|
|           |          |                 | Bias      | Variance | MSE    | Bias      | Variance | MSE    | Bias      | Variance | MSE    |
| Euclidean | Logistic | 30,30,30        | 0.0316    | 0.1424   | 0.1434 | 0.0089    | 0.1228   | 0.1229 | -0.0975   | 0.0447   | 0.0542 |
|           |          | 50,50,50        | 0.0403    | 0.1026   | 0.1042 | 0.0083    | 0.0979   | 0.0979 | -0.0554   | 0.0217   | 0.0248 |
|           |          | 100,100,100     | 0.0123    | 0.0523   | 0.0524 | 0.0296    | 0.0618   | 0.0627 | -0.0168   | 0.0042   | 0.0045 |
|           |          | 200,200,200     | 0.0093    | 0.0252   | 0.0253 | 0.0205    | 0.0358   | 0.0362 | -0.0032   | 0.0005   | 0.0005 |
|           |          | 200,50,50       | 0.0295    | 0.0664   | 0.0673 | 0.0148    | 0.0700   | 0.0702 | -0.0236   | 0.0070   | 0.0075 |
|           | Yan      | 30,30,30        | 0.0453    | 0.2753   | 0.2774 | -0.0784   | 0.2340   | 0.2402 | -0.2136   | 0.1186   | 0.1643 |
|           |          | 50,50,50        | 0.0732    | 0.2399   | 0.2453 | -0.0277   | 0.1988   | 0.1995 | -0.1588   | 0.0867   | 0.1120 |
|           |          | 100,100,100     | 0.0305    | 0.1598   | 0.1608 | 0.0334    | 0.1248   | 0.1259 | -0.0800   | 0.0353   | 0.0417 |
|           |          | 200,200,200     | 0.0494    | 0.1050   | 0.1075 | 0.0744    | 0.0979   | 0.1035 | -0.0386   | 0.0133   | 0.0148 |
|           |          | 200,50,50       | 0.0634    | 0.2370   | 0.2410 | -0.0037   | 0.1860   | 0.1860 | -0.1375   | 0.0763   | 0.0952 |
|           | Normal   | 30,30,30        | 0.0370    | 0.1560   | 0.1574 | -0.0062   | 0.1386   | 0.1386 | -0.1215   | 0.0562   | 0.0710 |
|           |          | 50,50,50        | 0.0420    | 0.1187   | 0.1205 | 0.0031    | 0.1111   | 0.1111 | -0.0690   | 0.0279   | 0.0326 |
|           |          | 100,100,100     | 0.0119    | 0.0598   | 0.0600 | 0.0307    | 0.0681   | 0.0691 | -0.0217   | 0.0057   | 0.0061 |
|           |          | 200,200,200     | 0.0097    | 0.0310   | 0.0311 | 0.0196    | 0.0396   | 0.0400 | -0.0052   | 0.0009   | 0.0010 |
|           |          | 200,50,50       | 0.0428    | 0.1015   | 0.1033 | 0.0017    | 0.0968   | 0.0968 | -0.0453   | 0.0159   | 0.0179 |
|           | Stepwise | 30,30,30        | -0.4159   | 0.1944   | 0.3673 | -0.4376   | 0.2396   | 0.4310 | -0.3225   | 0.1896   | 0.2936 |
|           |          | 50,50,50        | -0.4280   | 0.1736   | 0.3568 | -0.3383   | 0.2104   | 0.3248 | -0.2723   | 0.1507   | 0.2249 |
|           |          | 100,100,100     | -0.4140   | 0.1616   | 0.3331 | -0.3139   | 0.1765   | 0.2750 | -0.1959   | 0.0984   | 0.1368 |
|           |          | 200,200,200     | -0.4333   | 0.1306   | 0.3183 | -0.2877   | 0.1425   | 0.2253 | -0.1219   | 0.0574   | 0.0723 |
|           |          | 200,50,50       | -0.3936   | 0.1869   | 0.3419 | -0.3644   | 0.2013   | 0.3341 | -0.2376   | 0.1276   | 0.1841 |
| Youden    | Logistic | 30,30,30        | 0.0316    | 0.1424   | 0.1434 | 0.0089    | 0.1228   | 0.1229 | -0.0975   | 0.0447   | 0.0542 |
|           |          | 50,50,50        | 0.0403    | 0.1026   | 0.1042 | 0.0083    | 0.0979   | 0.0979 | -0.0554   | 0.0217   | 0.0248 |
|           |          | 100,100,100     | 0.0123    | 0.0523   | 0.0524 | 0.0296    | 0.0618   | 0.0627 | -0.0168   | 0.0042   | 0.0045 |
|           |          | 200,200,200     | 0.0093    | 0.0252   | 0.0253 | 0.0205    | 0.0358   | 0.0362 | -0.0032   | 0.0005   | 0.0005 |
|           |          | 200,50,50       | 0.0295    | 0.0664   | 0.0673 | 0.0148    | 0.0700   | 0.0702 | -0.0236   | 0.0070   | 0.0075 |
|           | Yan      | 30,30,30        | 0.0576    | 0.2699   | 0.2732 | -0.0377   | 0.2193   | 0.2208 | -0.2219   | 0.1185   | 0.1678 |
|           |          | 50,50,50        | 0.0734    | 0.2206   | 0.2269 | -0.0131   | 0.1869   | 0.1871 | -0.1479   | 0.0771   | 0.0990 |
|           |          | 100,100,100     | 0.0204    | 0.1460   | 0.1464 | 0.0368    | 0.1233   | 0.1247 | -0.0718   | 0.0300   | 0.0352 |
|           |          | 200,200,200     | 0.0495    | 0.1021   | 0.1045 | 0.0705    | 0.0963   | 0.1013 | -0.0372   | 0.0122   | 0.0136 |
|           |          | 200,50,50       | 0.0672    | 0.2203   | 0.2248 | 0.0026    | 0.1703   | 0.1703 | -0.1215   | 0.0657   | 0.0805 |
|           | Normal   | 30,30,30        | 0.0384    | 0.1537   | 0.1551 | 0.0050    | 0.1292   | 0.1292 | -0.1068   | 0.0484   | 0.0598 |
|           |          | 50,50,50        | 0.0420    | 0.1086   | 0.1103 | 0.0065    | 0.1030   | 0.1030 | -0.0596   | 0.0233   | 0.0269 |
|           |          | 100,100,100     | 0.0105    | 0.0531   | 0.0532 | 0.0284    | 0.0637   | 0.0645 | -0.0177   | 0.0043   | 0.0047 |
|           |          | 200,200,200     | 0.0083    | 0.0262   | 0.0263 | 0.0211    | 0.0362   | 0.0367 | -0.0037   | 0.0006   | 0.0006 |
|           |          | 200,50,50       | 0.0409    | 0.0868   | 0.0885 | 0.0061    | 0.0842   | 0.0843 | -0.0348   | 0.0120   | 0.0132 |
|           | Stepwise | 30,30,30        | -0.0016   | 0.1896   | 0.1896 | -0.1740   | 0.2236   | 0.2539 | -0.2962   | 0.1661   | 0.2538 |
|           |          | 50,50,50        | 0.0424    | 0.1730   | 0.1748 | -0.1304   | 0.2036   | 0.2206 | -0.2329   | 0.1240   | 0.1782 |
|           |          | 100,100,100     | -0.0090   | 0.1192   | 0.1193 | -0.0751   | 0.1560   | 0.1616 | -0.1367   | 0.0683   | 0.0870 |
|           |          | 200,200,200     | -0.0047   | 0.0862   | 0.0863 | -0.0220   | 0.1241   | 0.1246 | -0.0829   | 0.0335   | 0.0404 |
|           |          | 200,50,50       | 0.0407    | 0.1487   | 0.1504 | -0.0823   | 0.1723   | 0.1790 | -0.1828   | 0.0963   | 0.1297 |

**Table B.3**

The table provides results for the normal scenarios with  $\Sigma = 0.5I + 0.5J$ . The table provides the bias, variance, and MSE for the cutoff values,  $c_1$  and  $c_2$ , for each of the explored approaches when using the Euclidean distance as the objective function.

| Method    | Approach    | $n_1, n_2, n_3$ | $c_1$   |          |         | $c_2$   |          |        |
|-----------|-------------|-----------------|---------|----------|---------|---------|----------|--------|
|           |             |                 | Bias    | Variance | MSE     | Bias    | Variance | MSE    |
| Euclidean | Logistic    | 30,30,30        | -0.0992 | 0.2195   | 0.2293  | -0.3996 | 0.5650   | 0.7246 |
|           |             | 50,50,50        | -0.0448 | 0.1565   | 0.1585  | -0.2066 | 0.4009   | 0.4436 |
|           |             | 100,100,100     | -0.0113 | 0.1066   | 0.1067  | -0.0843 | 0.3011   | 0.3082 |
|           |             | 200,200,200     | 0.0011  | 0.0599   | 0.0599  | -0.0087 | 0.1917   | 0.1918 |
|           |             | 200,50,50       | 0.0714  | 0.1227   | 0.1278  | -0.1121 | 0.3936   | 0.4062 |
|           | Yan         | 30,30,30        | -0.1837 | 0.1093   | 0.1431  | -0.6827 | 0.6450   | 1.1111 |
|           |             | 50,50,50        | -0.1259 | 0.0796   | 0.0954  | -0.4053 | 0.5824   | 0.7467 |
|           |             | 100,100,100     | -0.0698 | 0.0505   | 0.0554  | -0.1811 | 0.4303   | 0.4631 |
|           |             | 200,200,200     | -0.0256 | 0.0337   | 0.0344  | 0.0131  | 0.3360   | 0.3361 |
|           |             | 200,50,50       | -0.0752 | 0.0636   | 0.0692  | -0.3239 | 0.5621   | 0.6670 |
|           | Normal      | 30,30,30        | -0.0818 | 0.0592   | 0.0659  | -0.3682 | 0.4081   | 0.5437 |
|           |             | 50,50,50        | -0.0552 | 0.0403   | 0.0434  | -0.2101 | 0.3318   | 0.3760 |
|           |             | 100,100,100     | -0.0179 | 0.0233   | 0.0236  | -0.0547 | 0.2398   | 0.2428 |
|           |             | 200,200,200     | -0.0055 | 0.0136   | 0.0136  | 0.0001  | 0.1600   | 0.1600 |
|           |             | 200,50,50       | -0.0233 | 0.0273   | 0.0278  | -0.1449 | 0.3056   | 0.3266 |
|           | Stepwise    | 30,30,30        | -0.2191 | 0.1426   | 0.1906  | -1.0821 | 0.5195   | 1.6904 |
|           |             | 50,50,50        | -0.1518 | 0.1099   | 0.1330  | -0.8256 | 0.5059   | 1.1876 |
|           |             | 100,100,100     | 0.0185  | 0.0708   | 0.0711  | -0.5286 | 0.4490   | 0.7284 |
|           |             | 200,200,200     | 0.0292  | 0.0546   | 0.0555  | -0.3103 | 0.4004   | 0.4967 |
|           |             | 200,50,50       | 0.0662  | 0.0695   | 0.0739  | -0.7092 | 0.4916   | 0.9946 |
| Youden    | Logistic    | 30,30,30        | -0.2996 | 0.4115   | 0.5012  | -0.3982 | 0.6398   | 0.7984 |
|           |             | 50,50,50        | -0.1917 | 0.3195   | 0.3563  | -0.2436 | 0.4753   | 0.5347 |
|           |             | 100,100,100     | -0.0890 | 0.2165   | 0.2244  | -0.0877 | 0.3642   | 0.3719 |
|           |             | 200,200,200     | -0.0533 | 0.1424   | 0.1453  | -0.0114 | 0.2583   | 0.2584 |
|           |             | 200,50,50       | -0.0137 | 0.2488   | 0.2490  | -0.1212 | 0.5010   | 0.5157 |
|           | Yan         | 30,30,30        | -0.2737 | 0.2409   | 0.3158  | -0.5371 | 0.6716   | 0.9601 |
|           |             | 50,50,50        | -0.1818 | 0.1933   | 0.2264  | -0.3492 | 0.5366   | 0.6586 |
|           |             | 100,100,100     | -0.0776 | 0.1167   | 0.1227  | -0.1545 | 0.3925   | 0.4164 |
|           |             | 200,200,200     | -0.0153 | 0.0786   | 0.0788  | -0.0060 | 0.3020   | 0.3021 |
|           |             | 200,50,50       | -0.1045 | 0.1561   | 0.1670  | -0.2640 | 0.5466   | 0.6163 |
|           | Normal      | 30,30,30        | -0.1393 | 0.1071   | 0.1265  | -0.2499 | 0.3790   | 0.4414 |
|           |             | 50,50,50        | -0.0946 | 0.0748   | 0.0837  | -0.1419 | 0.2858   | 0.3059 |
|           |             | 100,100,100     | -0.0318 | 0.0438   | 0.0449  | -0.0319 | 0.1957   | 0.1967 |
|           |             | 200,200,200     | -0.0079 | 0.0247   | 0.0247  | 0.0123  | 0.1298   | 0.1300 |
|           |             | 200,50,50       | -0.0527 | 0.0553   | 0.0581  | -0.0735 | 0.2649   | 0.2703 |
| Stepwise  | 30,30,30    | -0.4085         | 0.2215  | 0.3884   | -1.0540 | 0.5327  | 1.6436   |        |
|           | 50,50,50    | -0.3214         | 0.2031  | 0.3064   | -0.8372 | 0.4776  | 1.1785   |        |
|           | 100,100,100 | -0.1972         | 0.1770  | 0.2159   | -0.5567 | 0.4373  | 0.7473   |        |
|           | 200,200,200 | -0.1268         | 0.1246  | 0.1407   | -0.3605 | 0.3668  | 0.4967   |        |
|           | 200,50,50   | -0.1877         | 0.1743  | 0.2095   | -0.6699 | 0.4835  | 0.9324   |        |

**Table B.4**

The table provides results for the normal scenarios with  $\Sigma = 0.3I + 0.7J$ . The table provides the bias, variance, and MSE for the cutoff values,  $c_1$  and  $c_2$ , for each of the explored approaches when using the Euclidean distance as the objective function.

| Method    | Approach    | $n_1, n_2, n_3$ | $c_1$   |          |         | $c_2$   |          |        |
|-----------|-------------|-----------------|---------|----------|---------|---------|----------|--------|
|           |             |                 | Bias    | Variance | MSE     | Bias    | Variance | MSE    |
| Euclidean | Logistic    | 30,30,30        | -0.0736 | 0.1704   | 0.1758  | -0.2069 | 0.6294   | 0.6722 |
|           |             | 50,50,50        | -0.0229 | 0.1399   | 0.1404  | -0.0751 | 0.4422   | 0.4478 |
|           |             | 100,100,100     | 0.0156  | 0.0836   | 0.0838  | 0.0067  | 0.3153   | 0.3154 |
|           |             | 200,200,200     | 0.0072  | 0.0544   | 0.0544  | 0.0196  | 0.1954   | 0.1958 |
|           |             | 200,50,50       | 0.0656  | 0.0978   | 0.1021  | -0.0162 | 0.4096   | 0.4099 |
|           | Yan         | 30,30,30        | -0.1309 | 0.0928   | 0.1100  | -0.4574 | 0.7453   | 0.9545 |
|           |             | 50,50,50        | -0.0965 | 0.0705   | 0.0798  | -0.2287 | 0.6693   | 0.7216 |
|           |             | 100,100,100     | -0.0389 | 0.0458   | 0.0473  | -0.0299 | 0.4997   | 0.5006 |
|           |             | 200,200,200     | -0.0027 | 0.0340   | 0.0340  | 0.1462  | 0.4677   | 0.4891 |
|           |             | 200,50,50       | -0.0393 | 0.0680   | 0.0695  | -0.1348 | 0.7693   | 0.7875 |
|           | Normal      | 30,30,30        | -0.0435 | 0.0522   | 0.0541  | -0.1839 | 0.4732   | 0.5070 |
|           |             | 50,50,50        | -0.0257 | 0.0347   | 0.0353  | -0.0606 | 0.3903   | 0.3940 |
|           |             | 100,100,100     | -0.0009 | 0.0203   | 0.0203  | 0.0306  | 0.2798   | 0.2807 |
|           |             | 200,200,200     | 0.0019  | 0.0114   | 0.0114  | 0.0374  | 0.1739   | 0.1753 |
|           |             | 200,50,50       | 0.0022  | 0.0257   | 0.0257  | -0.0107 | 0.3804   | 0.3805 |
|           | Stepwise    | 30,30,30        | -0.1355 | 0.1232   | 0.1416  | -0.7874 | 0.5222   | 1.1422 |
|           |             | 50,50,50        | -0.0855 | 0.1007   | 0.1080  | -0.5422 | 0.4990   | 0.7930 |
|           |             | 100,100,100     | 0.0711  | 0.0551   | 0.0601  | -0.2685 | 0.4752   | 0.5473 |
|           |             | 200,200,200     | 0.0673  | 0.0454   | 0.0499  | -0.1139 | 0.4098   | 0.4228 |
|           |             | 200,50,50       | 0.1316  | 0.0662   | 0.0835  | -0.4149 | 0.5379   | 0.7101 |
| Youden    | Logistic    | 30,30,30        | -0.2082 | 0.3665   | 0.4099  | -0.2135 | 0.6595   | 0.7051 |
|           |             | 50,50,50        | -0.1501 | 0.2900   | 0.3125  | -0.1021 | 0.4882   | 0.4986 |
|           |             | 100,100,100     | -0.0569 | 0.1908   | 0.1940  | -0.0078 | 0.3570   | 0.3571 |
|           |             | 200,200,200     | -0.0377 | 0.1233   | 0.1247  | 0.0028  | 0.2273   | 0.2273 |
|           |             | 200,50,50       | 0.0111  | 0.2045   | 0.2046  | -0.0597 | 0.4706   | 0.4742 |
|           | Yan         | 30,30,30        | -0.2223 | 0.2400   | 0.2894  | -0.3130 | 0.7577   | 0.8557 |
|           |             | 50,50,50        | -0.1293 | 0.2082   | 0.2249  | -0.1471 | 0.5963   | 0.6179 |
|           |             | 100,100,100     | -0.0439 | 0.1242   | 0.1262  | -0.0225 | 0.4652   | 0.4657 |
|           |             | 200,200,200     | 0.0240  | 0.0917   | 0.0923  | 0.1209  | 0.3894   | 0.4040 |
|           |             | 200,50,50       | -0.0524 | 0.1705   | 0.1732  | -0.0706 | 0.6249   | 0.6299 |
| Normal    | 30,30,30    | -0.0860         | 0.1086  | 0.1160   | -0.0865 | 0.4418  | 0.4492   |        |
|           | 50,50,50    | -0.0534         | 0.0737  | 0.0765   | -0.0154 | 0.3275  | 0.3277   |        |
|           | 100,100,100 | -0.0071         | 0.0440  | 0.0440   | 0.0371  | 0.2194  | 0.2208   |        |
|           | 200,200,200 | 0.0026          | 0.0233  | 0.0233   | 0.0409  | 0.1351  | 0.1368   |        |
|           | 200,50,50   | -0.0194         | 0.0569  | 0.0573   | 0.0319  | 0.3145  | 0.3155   |        |
| Stepwise  | 30,30,30    | -0.3109         | 0.1918  | 0.2885   | -0.7594 | 0.4405  | 1.0172   |        |
|           | 50,50,50    | -0.2193         | 0.1980  | 0.2461   | -0.5267 | 0.4866  | 0.7640   |        |
|           | 100,100,100 | -0.1245         | 0.1671  | 0.1826   | -0.3642 | 0.4432  | 0.5759   |        |
|           | 200,200,200 | -0.0655         | 0.1148  | 0.1191   | -0.1823 | 0.3819  | 0.4151   |        |
|           | 200,50,50   | -0.0985         | 0.1615  | 0.1712   | -0.3721 | 0.5089  | 0.6473   |        |



**Table B.5**

The table provides results for the normal scenarios with  $\Sigma = 0.5I + 0.5J$ . The table provides the bias, variance, and MSE for  $TCR_1$ ,  $TCR_2$ , and  $TCR_3$  for each of the explored approaches when using the Euclidean distance as the objective function.

| Method      | Approach    | $n_1, n_2, n_3$ | $TCR_1$  |          |         | $TCR_2$ |          |         | $TCR_3$ |          |        | $Sum(TCRs)$ |        |
|-------------|-------------|-----------------|----------|----------|---------|---------|----------|---------|---------|----------|--------|-------------|--------|
|             |             |                 | Bias     | Variance | MSE     | Bias    | Variance | MSE     | Bias    | Variance | MSE    | Mean        |        |
| Euclidean   | Logistic    | 30,30,30        | 0.0030   | 0.0094   | 0.0095  | -0.0175 | 0.0082   | 0.0085  | 0.0351  | 0.0084   | 0.0096 | 1.8736      |        |
|             |             | 50,50,50        | 0.0119   | 0.0061   | 0.0063  | -0.0002 | 0.0049   | 0.0049  | 0.0236  | 0.0056   | 0.0062 | 1.8884      |        |
|             |             | 100,100,100     | 0.0165   | 0.0040   | 0.0043  | 0.0055  | 0.0032   | 0.0032  | 0.0256  | 0.0038   | 0.0045 | 1.9006      |        |
|             |             | 200,200,200     | 0.0183   | 0.0022   | 0.0026  | 0.0136  | 0.0019   | 0.0021  | 0.0224  | 0.0024   | 0.0029 | 1.9073      |        |
|             |             | 200,50,50       | 0.0334   | 0.0043   | 0.0054  | -0.0134 | 0.0046   | 0.0048  | 0.0247  | 0.0065   | 0.0072 | 1.8977      |        |
|             |             | 30,30,30        | -0.0037  | 0.0047   | 0.0047  | -0.0070 | 0.0035   | 0.0036  | 0.0088  | 0.0043   | 0.0043 | 1.8511      |        |
|             | Yan         | 50,50,50        | 0.0028   | 0.0028   | 0.0028  | 0.0075  | 0.0021   | 0.0021  | 0.0100  | 0.0025   | 0.0026 | 1.8733      |        |
|             |             | 100,100,100     | 0.0097   | 0.0014   | 0.0015  | 0.0175  | 0.0010   | 0.0013  | 0.0131  | 0.0014   | 0.0015 | 1.8932      |        |
|             |             | 200,200,200     | 0.0129   | 0.0008   | 0.0009  | 0.0232  | 0.0005   | 0.0011  | 0.0139  | 0.0007   | 0.0009 | 1.9030      |        |
|             |             | 200,50,50       | 0.0120   | 0.0019   | 0.0020  | 0.0067  | 0.0017   | 0.0017  | 0.0081  | 0.0026   | 0.0027 | 1.8798      |        |
|             |             | Normal          | 30,30,30 | 0.0133   | 0.0021  | 0.0023  | 0.0052   | 0.0015  | 0.0015  | 0.0175   | 0.0021 | 0.0024      | 1.8890 |
|             |             |                 | 50,50,50 | 0.0145   | 0.0012  | 0.0014  | 0.0136   | 0.0008  | 0.0010  | 0.0174   | 0.0012 | 0.0015      | 1.8985 |
|             | 100,100,100 |                 | 0.0175   | 0.0006   | 0.0009  | 0.0186  | 0.0004   | 0.0007  | 0.0188  | 0.0006   | 0.0010 | 1.9079      |        |
|             | 200,200,200 |                 | 0.0183   | 0.0003   | 0.0006  | 0.0207  | 0.0002   | 0.0006  | 0.0198  | 0.0003   | 0.0007 | 1.9119      |        |
|             | 200,50,50   |                 | 0.0195   | 0.0006   | 0.0010  | 0.0138  | 0.0005   | 0.0007  | 0.0166  | 0.0012   | 0.0015 | 1.9029      |        |
|             | 30,30,30    |                 | 0.0010   | 0.0081   | 0.0081  | -0.0399 | 0.0076   | 0.0092  | 0.0209  | 0.0075   | 0.0079 | 1.8350      |        |
|             | Stepwise    | 50,50,50        | 0.0116   | 0.0053   | 0.0054  | -0.0246 | 0.0051   | 0.0057  | 0.0180  | 0.0053   | 0.0056 | 1.8580      |        |
|             |             | 100,100,100     | 0.0425   | 0.0019   | 0.0037  | -0.0219 | 0.0027   | 0.0032  | 0.0114  | 0.0031   | 0.0032 | 1.8850      |        |
|             |             | 200,200,200     | 0.0367   | 0.0014   | 0.0027  | -0.0061 | 0.0019   | 0.0019  | 0.0120  | 0.0019   | 0.0020 | 1.8956      |        |
|             |             | 200,50,50       | 0.0624   | 0.0016   | 0.0055  | -0.0499 | 0.0041   | 0.0066  | 0.0058  | 0.0049   | 0.0049 | 1.8713      |        |
|             |             | Logistic        | 30,30,30 | -0.0434  | 0.0158  | 0.0177  | 0.0101   | 0.0217  | 0.0218  | 0.0250   | 0.0119 | 0.0125      | 1.8593 |
|             |             |                 | 50,50,50 | -0.0238  | 0.0113  | 0.0119  | 0.0152   | 0.0170  | 0.0172  | 0.0209   | 0.0092 | 0.0096      | 1.8799 |
|             | 100,100,100 |                 | -0.0061  | 0.0070   | 0.0070  | 0.0212  | 0.0112   | 0.0116  | 0.0170  | 0.0063   | 0.0066 | 1.8998      |        |
|             | 200,200,200 |                 | 0.0003   | 0.0045   | 0.0045  | 0.0279  | 0.0081   | 0.0088  | 0.0146  | 0.0047   | 0.0049 | 1.9104      |        |
| 200,50,50   | 0.0078      |                 | 0.0074   | 0.0075   | -0.0010 | 0.0142  | 0.0142   | 0.0164  | 0.0097  | 0.0100   | 1.8909 |             |        |
| 30,30,30    | -0.0242     |                 | 0.0085   | 0.0091   | 0.0206  | 0.0106  | 0.0110   | -0.0091 | 0.0078  | 0.0079   | 1.8549 |             |        |
| Yan         | 50,50,50    | -0.0111         | 0.0061   | 0.0062   | 0.0232  | 0.0073  | 0.0079   | 0.0003  | 0.0048  | 0.0048   | 1.8800 |             |        |
|             | 100,100,100 | 0.0036          | 0.0030   | 0.0030   | 0.0239  | 0.0040  | 0.0046   | 0.0081  | 0.0030  | 0.0030   | 1.9033 |             |        |
|             | 200,200,200 | 0.0095          | 0.0017   | 0.0018   | 0.0269  | 0.0024  | 0.0031   | 0.0110  | 0.0016  | 0.0017   | 1.9150 |             |        |
|             | 200,50,50   | 0.0020          | 0.0041   | 0.0041   | 0.0189  | 0.0051  | 0.0055   | -0.0001 | 0.0051  | 0.0051   | 1.8875 |             |        |
|             | Normal      | 30,30,30        | -0.0016  | 0.0030   | 0.0030  | 0.0314  | 0.0043   | 0.0053  | 0.0021  | 0.0029   | 0.0029 | 1.8995      |        |
|             |             | 50,50,50        | 0.0026   | 0.0018   | 0.0018  | 0.0334  | 0.0025   | 0.0036  | 0.0077  | 0.0016   | 0.0017 | 1.9112      |        |
| 100,100,100 |             | 0.0100          | 0.0009   | 0.0010   | 0.0323  | 0.0014  | 0.0024   | 0.0115  | 0.0008  | 0.0009   | 1.9214 |             |        |
| 200,200,200 |             | 0.0125          | 0.0004   | 0.0006   | 0.0318  | 0.0007  | 0.0017   | 0.0139  | 0.0004  | 0.0006   | 1.9258 |             |        |
| 200,50,50   |             | 0.0081          | 0.0011   | 0.0011   | 0.0329  | 0.0019  | 0.0030   | 0.0071  | 0.0017  | 0.0017   | 1.9158 |             |        |
| 30,30,30    |             | -0.0274         | 0.0129   | 0.0137   | -0.0156 | 0.0191  | 0.0193   | -0.0065 | 0.0121  | 0.0121   | 1.8180 |             |        |
| Stepwise    | 50,50,50    | -0.0160         | 0.0096   | 0.0099   | -0.0004 | 0.0159  | 0.0159   | -0.0049 | 0.0094  | 0.0094   | 1.8463 |             |        |
|             | 100,100,100 | -0.0009         | 0.0064   | 0.0064   | 0.0095  | 0.0105  | 0.0106   | 0.0026  | 0.0061  | 0.0061   | 1.8788 |             |        |
|             | 200,200,200 | 0.0052          | 0.0038   | 0.0038   | 0.0148  | 0.0067  | 0.0069   | 0.0105  | 0.0038  | 0.0039   | 1.8982 |             |        |
|             | 200,50,50   | 0.0065          | 0.0063   | 0.0064   | -0.0107 | 0.0125  | 0.0126   | 0.0010  | 0.0087  | 0.0087   | 1.8644 |             |        |

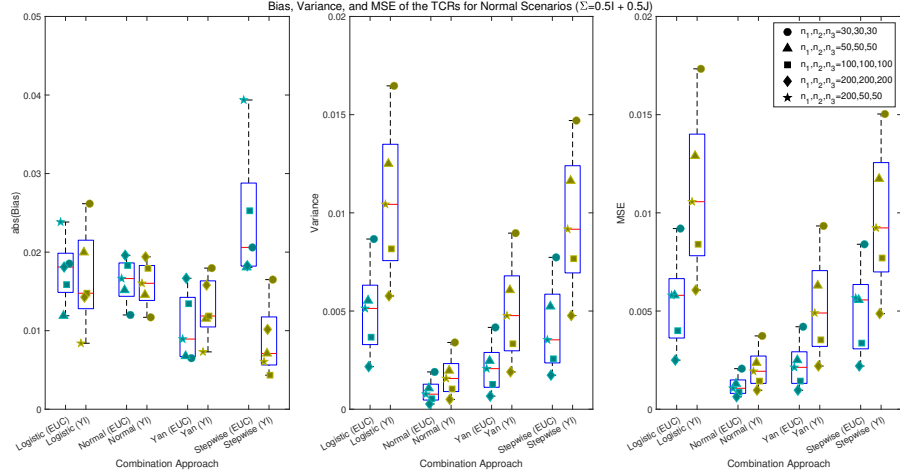

Figure 1: The plot displays the bias, variance, and MSE of  $\widehat{TCR}_1$ ,  $\widehat{TCR}_2$ , and  $\widehat{TCR}_3$  for each sample size explored. We see that for most scenarios, the Euclidean method had smaller bias than the Youden index. For all scenarios, the Euclidean method had smaller variance and MSE.

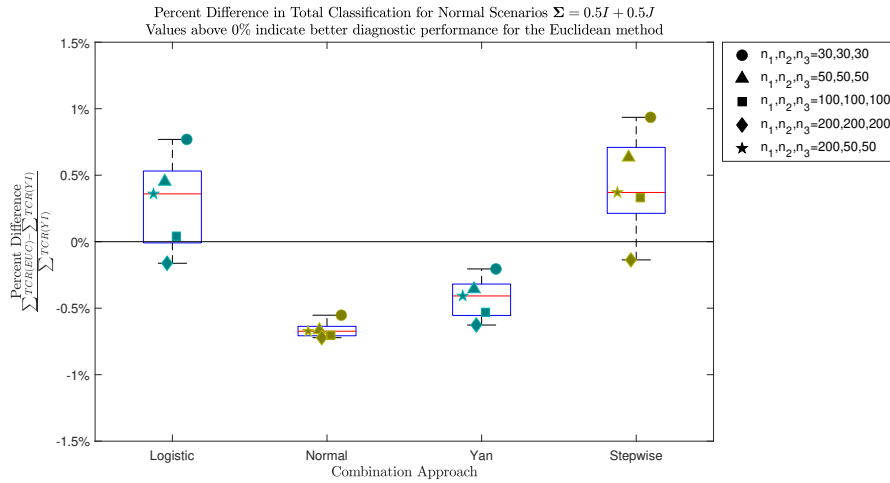

Figure 2: The plot displays the percent difference in  $\sum_i TCR_i$ ,  $i = 1, 2, 3$ , i.e. total classification, for the Euclidean method (EUC) versus the Youden index (YI) for each of the combination approaches and sample sizes, where  $\Sigma = 0.7I + 0.3J$ . The percent difference is calculated by  $\frac{\Sigma TCR(EUC) - \Sigma TCR(YI)}{\Sigma TCR(YI)}$ . Values above 0% correspond to a higher total classification for the Euclidean method than the Youden index, indicating better diagnostic performance for the Euclidean method. Both logistic regression and the stepwise procedure saw higher total classification than the Youden index for all sample sizes except when  $(n_1, n_2, n_3) = (200, 200, 200)$ . For the normality assumption and Yan's method, the Youden index saw higher total classification that was less than 1% higher than that of the Euclidean method.

**Table B.6**

The table provides results for the normal scenarios with  $\Sigma = 0.3I + 0.7J$ . The table provides the bias, variance, and MSE for  $TCR_1$ ,  $TCR_2$ , and  $TCR_3$  for each of the explored approaches when using the Euclidean distance as the objective function.

| Method    | Approach    | $n_1, n_2, n_3$ | $TCR_1$ |          |         | $TCR_2$ |          |         | $TCR_3$ |          |        | $Sum(TCRs)$ |
|-----------|-------------|-----------------|---------|----------|---------|---------|----------|---------|---------|----------|--------|-------------|
|           |             |                 | Bias    | Variance | MSE     | Bias    | Variance | MSE     | Bias    | Variance | MSE    | Mean        |
| Euclidean | Logistic    | 30,30,30        | -0.0195 | 0.0091   | 0.0095  | -0.0364 | 0.0083   | 0.0097  | 0.0151  | 0.0088   | 0.0091 | 1.8122      |
|           |             | 50,50,50        | -0.0095 | 0.0069   | 0.0070  | -0.0240 | 0.0056   | 0.0061  | 0.0054  | 0.0063   | 0.0064 | 1.8248      |
|           |             | 100,100,100     | -0.0009 | 0.0040   | 0.0040  | -0.0175 | 0.0033   | 0.0036  | 0.0033  | 0.0044   | 0.0044 | 1.8378      |
|           |             | 200,200,200     | -0.0024 | 0.0026   | 0.0026  | -0.0100 | 0.0021   | 0.0022  | 0.0036  | 0.0026   | 0.0026 | 1.8442      |
|           | Yan         | 200,50,50       | 0.0107  | 0.0047   | 0.0049  | -0.0340 | 0.0047   | 0.0059  | 0.0052  | 0.0069   | 0.0070 | 1.8349      |
|           |             | 30,30,30        | -0.0247 | 0.0047   | 0.0053  | -0.0292 | 0.0036   | 0.0045  | -0.0122 | 0.0045   | 0.0046 | 1.7869      |
|           |             | 50,50,50        | -0.0224 | 0.0031   | 0.0036  | -0.0147 | 0.0022   | 0.0024  | -0.0096 | 0.0028   | 0.0029 | 1.8063      |
|           |             | 100,100,100     | -0.0120 | 0.0016   | 0.0017  | -0.0044 | 0.0011   | 0.0011  | -0.0075 | 0.0015   | 0.0015 | 1.8291      |
|           | Normal      | 200,200,200     | -0.0091 | 0.0009   | 0.0010  | 0.0013  | 0.0006   | 0.0006  | -0.0067 | 0.0008   | 0.0009 | 1.8385      |
|           |             | 200,50,50       | -0.0111 | 0.0022   | 0.0023  | -0.0156 | 0.0018   | 0.0020  | -0.0141 | 0.0028   | 0.0030 | 1.8122      |
|           |             | 30,30,30        | -0.0075 | 0.0022   | 0.0022  | -0.0167 | 0.0014   | 0.0017  | -0.0033 | 0.0022   | 0.0022 | 1.8256      |
|           |             | 50,50,50        | -0.0065 | 0.0013   | 0.0013  | -0.0081 | 0.0008   | 0.0009  | -0.0032 | 0.0013   | 0.0013 | 1.8352      |
|           | Stepwise    | 100,100,100     | -0.0030 | 0.0006   | 0.0006  | -0.0035 | 0.0004   | 0.0004  | -0.0020 | 0.0006   | 0.0006 | 1.8446      |
|           |             | 200,200,200     | -0.0021 | 0.0003   | 0.0003  | -0.0015 | 0.0002   | 0.0002  | -0.0006 | 0.0003   | 0.0003 | 1.8488      |
|           |             | 200,50,50       | -0.0012 | 0.0007   | 0.0007  | -0.0082 | 0.0005   | 0.0006  | -0.0040 | 0.0012   | 0.0013 | 1.8396      |
|           |             | 30,30,30        | -0.0147 | 0.0083   | 0.0085  | -0.0639 | 0.0077   | 0.0118  | 0.0022  | 0.0080   | 0.0080 | 1.7766      |
|           | Youden      | 50,50,50        | -0.0079 | 0.0058   | 0.0059  | -0.0474 | 0.0055   | 0.0077  | 0.0026  | 0.0056   | 0.0056 | 1.8002      |
|           |             | 100,100,100     | -0.0267 | 0.0019   | 0.0026  | -0.0440 | 0.0028   | 0.0047  | -0.0089 | 0.0032   | 0.0032 | 1.8268      |
|           |             | 200,200,200     | 0.0195  | 0.0015   | 0.0019  | -0.0275 | 0.0020   | 0.0028  | -0.0095 | 0.0022   | 0.0023 | 1.8356      |
|           |             | 200,50,50       | 0.0478  | 0.0018   | 0.0041  | -0.0768 | 0.0040   | 0.0099  | -0.0092 | 0.0048   | 0.0049 | 1.8148      |
|           | Logistic    | 30,30,30        | -0.0560 | 0.0169   | 0.0201  | -0.0217 | 0.0236   | 0.0241  | 0.0085  | 0.0131   | 0.0132 | 1.7984      |
|           |             | 50,50,50        | -0.0431 | 0.0128   | 0.0147  | -0.0118 | 0.0196   | 0.0197  | 0.0039  | 0.0103   | 0.0103 | 1.8165      |
|           |             | 100,100,100     | -0.0227 | 0.0078   | 0.0083  | -0.0085 | 0.0137   | 0.0138  | -0.0003 | 0.0076   | 0.0076 | 1.8360      |
|           |             | 200,200,200     | -0.0159 | 0.0052   | 0.0055  | -0.0065 | 0.0093   | 0.0094  | 0.0025  | 0.0050   | 0.0050 | 1.8477      |
| 200,50,50 |             | -0.0073         | 0.0084  | 0.0084   | -0.0384 | 0.0172  | 0.0187   | 0.0055  | 0.0109  | 0.0110   | 1.8273 |             |
| Yan       |             | 30,30,30        | -0.0496 | 0.0102   | 0.0127  | -0.0011 | 0.0120   | 0.0120  | -0.0278 | 0.0091   | 0.0099 | 1.7891      |
|           |             | 50,50,50        | -0.0338 | 0.0076   | 0.0087  | -0.0020 | 0.0087   | 0.0087  | -0.0174 | 0.0055   | 0.0058 | 1.8144      |
|           |             | 100,100,100     | -0.0157 | 0.0039   | 0.0041  | -0.0033 | 0.0051   | 0.0051  | -0.0095 | 0.0033   | 0.0034 | 1.8391      |
|           |             | 200,200,200     | -0.0079 | 0.0023   | 0.0024  | -0.0032 | 0.0030   | 0.0030  | -0.0059 | 0.0020   | 0.0020 | 1.8507      |
| Normal    |             | 200,50,50       | -0.0184 | 0.0051   | 0.0055  | -0.0082 | 0.0064   | 0.0065  | -0.0191 | 0.0059   | 0.0062 | 1.8219      |
|           |             | 30,30,30        | -0.0192 | 0.0036   | 0.0040  | 0.0021  | 0.0057   | 0.0057  | -0.0149 | 0.0035   | 0.0037 | 1.8356      |
|           |             | 50,50,50        | -0.0145 | 0.0022   | 0.0024  | 0.0036  | 0.0034   | 0.0034  | -0.0088 | 0.0019   | 0.0020 | 1.8479      |
|           | 100,100,100 | -0.0059         | 0.0010  | 0.0011   | 0.0015  | 0.0018  | 0.0018   | -0.0047 | 0.0010  | 0.0010   | 1.8585 |             |
| Stepwise  | 200,200,200 | -0.0033         | 0.0005  | 0.0005   | 0.0007  | 0.0009  | 0.0009   | -0.0019 | 0.0005  | 0.0005   | 1.8632 |             |
|           | 200,50,50   | -0.0086         | 0.0013  | 0.0014   | 0.0032  | 0.0025  | 0.0026   | -0.0094 | 0.0020  | 0.0021   | 1.8527 |             |
|           | 30,30,30    | -0.0428         | 0.0138  | 0.0157   | -0.0355 | 0.0209  | 0.0222   | -0.0260 | 0.0136  | 0.0142   | 1.7633 |             |
|           | 50,50,50    | -0.0314         | 0.0108  | 0.0118   | -0.0270 | 0.0160  | 0.0167   | -0.0171 | 0.0097  | 0.0100   | 1.7921 |             |
| Youden    | 100,100,100 | -0.0151         | 0.0071  | 0.0073   | -0.0244 | 0.0133  | 0.0139   | -0.0094 | 0.0072  | 0.0073   | 1.8187 |             |
|           | 200,200,200 | -0.0089         | 0.0045  | 0.0045   | -0.0153 | 0.0078  | 0.0080   | -0.0059 | 0.0046  | 0.0046   | 1.8375 |             |
|           | 200,50,50   | -0.0078         | 0.0071  | 0.0071   | -0.0364 | 0.0138  | 0.0152   | -0.0152 | 0.0096  | 0.0098   | 1.8082 |             |

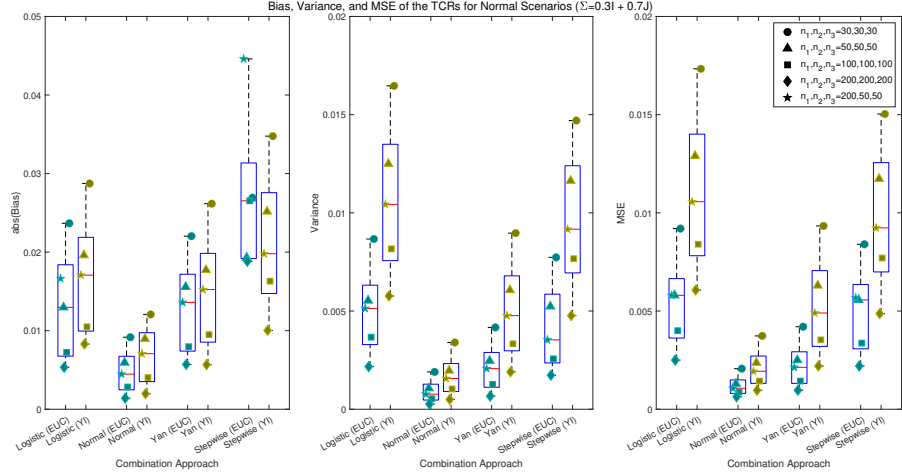

Figure 3: The plot displays the bias, variance, and MSE of  $\widehat{TCR}_1$ ,  $\widehat{TCR}_2$ , and  $\widehat{TCR}_3$  for each sample size explored. We see that for most scenarios, the Euclidean method had smaller bias than the Youden index. For all scenarios, the Euclidean method had smaller variance and MSE.

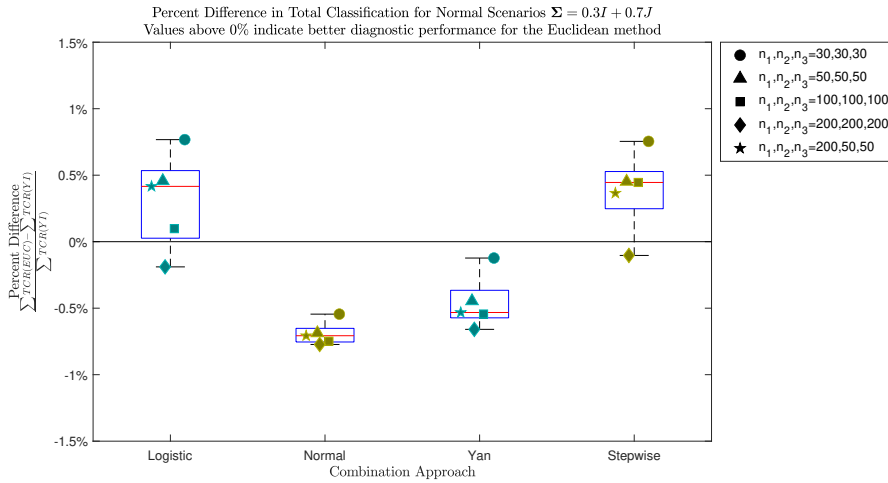

Figure 4: The plot displays the percent difference in  $\sum_i TCR_i$ ,  $i = 1, 2, 3$ , i.e. total classification, for the Euclidean method (EUC) versus the Youden index (YI) for each of the combination approaches and sample sizes, where  $\Sigma = 0.7I + 0.3J$ . The percent difference is calculated by  $\frac{\sum TCR(EUC) - \sum TCR(YI)}{\sum TCR(YI)}$ . Values above 0% correspond to a higher total classification for the Euclidean method than the Youden index, indicating better diagnostic performance for the Euclidean method. Both logistic regression and the stepwise procedure saw higher total classification than the Youden index for all sample sizes except when  $(n_1, n_2, n_3) = (200, 200, 200)$ . For the normality assumption and Yan's method, the Youden index saw higher total classification that was less than 1% higher than that of the Euclidean method.

**Table B.7**

The table provides results based on training data for the normal scenarios with  $\Sigma = 0.7I + 0.3J$ . The table provides the bias, variance, and MSE for  $TCR_1$ ,  $TCR_2$ , and  $TCR_3$  for each of the explored approaches when using the Euclidean distance as the objective function.

| Method    | Approach    | $n_1, n_2, n_3$ | $TCR_1$ |          |        | $TCR_2$ |          |        | $TCR_3$ |          |        | $Sum(TCRs)$ |
|-----------|-------------|-----------------|---------|----------|--------|---------|----------|--------|---------|----------|--------|-------------|
|           |             |                 | Bias    | Variance | MSE    | Bias    | Variance | MSE    | Bias    | Variance | MSE    | Mean        |
| Euclidean | Logistic    | 30,30,30        | 0.0484  | 0.0075   | 0.0099 | 0.0621  | 0.0069   | 0.0107 | 0.0510  | 0.0076   | 0.0102 | 2.1676      |
|           |             | 50,50,50        | 0.0332  | 0.0055   | 0.0066 | 0.0467  | 0.0046   | 0.0068 | 0.0382  | 0.0053   | 0.0068 | 2.1243      |
|           |             | 100,100,100     | 0.0242  | 0.0033   | 0.0039 | 0.0303  | 0.0028   | 0.0037 | 0.0252  | 0.0033   | 0.0039 | 2.0859      |
|           |             | 200,200,200     | 0.0151  | 0.0021   | 0.0024 | 0.0200  | 0.0016   | 0.0020 | 0.0144  | 0.0022   | 0.0024 | 2.0558      |
|           | Yan         | 200,50,50       | 0.0285  | 0.0038   | 0.0046 | 0.0413  | 0.0041   | 0.0058 | 0.0348  | 0.0055   | 0.0067 | 2.1107      |
|           |             | 30,30,30        | 0.0174  | 0.0052   | 0.0055 | 0.0505  | 0.0050   | 0.0075 | 0.0185  | 0.0057   | 0.0060 | 2.0926      |
|           |             | 50,50,50        | 0.0092  | 0.0033   | 0.0034 | 0.0340  | 0.0032   | 0.0044 | 0.0124  | 0.0031   | 0.0033 | 2.0618      |
|           |             | 100,100,100     | 0.0048  | 0.0018   | 0.0018 | 0.0227  | 0.0017   | 0.0022 | 0.0067  | 0.0016   | 0.0016 | 2.0404      |
|           | Normal      | 200,200,200     | 0.0021  | 0.0009   | 0.0009 | 0.0138  | 0.0008   | 0.0010 | 0.0004  | 0.0009   | 0.0009 | 2.0225      |
|           |             | 200,50,50       | 0.0021  | 0.0016   | 0.0016 | 0.0312  | 0.0029   | 0.0039 | 0.0121  | 0.0033   | 0.0034 | 2.0516      |
|           |             | 30,30,30        | 0.0083  | 0.0046   | 0.0047 | 0.0112  | 0.0067   | 0.0068 | 0.0074  | 0.0050   | 0.0050 | 2.0331      |
|           |             | 50,50,50        | 0.0026  | 0.0028   | 0.0028 | 0.0068  | 0.0042   | 0.0043 | 0.0084  | 0.0024   | 0.0025 | 2.0240      |
| Stepwise  | 100,100,100 | 0.0034          | 0.0013  | 0.0013   | 0.0059 | 0.0022  | 0.0022   | 0.0032 | 0.0013  | 0.0013   | 2.0188 |             |
|           | 200,200,200 | 0.0030          | 0.0007  | 0.0007   | 0.0010 | 0.0010  | 0.0010   | 0.0007 | 0.0007  | 0.0007   | 2.0110 |             |
|           | 200,50,50   | 0.0014          | 0.0010  | 0.0010   | 0.0057 | 0.0039  | 0.0039   | 0.0063 | 0.0027  | 0.0028   | 2.0217 |             |
|           | 30,30,30    | 0.0636          | 0.0056  | 0.0096   | 0.0883 | 0.0056  | 0.0134   | 0.0657 | 0.0057  | 0.0100   | 2.2238 |             |
| Youden    | 50,50,50    | 0.0457          | 0.0041  | 0.0062   | 0.0635 | 0.0040  | 0.0080   | 0.0483 | 0.0038  | 0.0062   | 2.1637 |             |
|           | 100,100,100 | 0.0466          | 0.0021  | 0.0042   | 0.0238 | 0.0025  | 0.0031   | 0.0229 | 0.0027  | 0.0033   | 2.0995 |             |
|           | 200,200,200 | 0.0349          | 0.0013  | 0.0025   | 0.0128 | 0.0016  | 0.0018   | 0.0107 | 0.0017  | 0.0018   | 2.0646 |             |
|           | 200,50,50   | 0.0513          | 0.0018  | 0.0045   | 0.0371 | 0.0040  | 0.0054   | 0.0390 | 0.0042  | 0.0057   | 2.1337 |             |
| Euclidean | Logistic    | 30,30,30        | 0.0157  | 0.0131   | 0.0133 | 0.0947  | 0.0243   | 0.0333 | 0.0598  | 0.0116   | 0.0152 | 2.1897      |
|           |             | 50,50,50        | 0.0145  | 0.0092   | 0.0094 | 0.0615  | 0.0181   | 0.0218 | 0.0490  | 0.0081   | 0.0105 | 2.1444      |
|           |             | 100,100,100     | 0.0089  | 0.0064   | 0.0065 | 0.0480  | 0.0110   | 0.0133 | 0.0276  | 0.0054   | 0.0062 | 2.1040      |
|           |             | 200,200,200     | 0.0033  | 0.0039   | 0.0039 | 0.0313  | 0.0076   | 0.0086 | 0.0178  | 0.0040   | 0.0044 | 2.0720      |
|           | Yan         | 200,50,50       | 0.0140  | 0.0064   | 0.0064 | 0.0555  | 0.0162   | 0.0193 | 0.0401  | 0.0091   | 0.0107 | 2.1292      |
|           |             | 30,30,30        | 0.0079  | 0.0104   | 0.0105 | 0.0759  | 0.0189   | 0.0246 | 0.0150  | 0.0105   | 0.0107 | 2.1183      |
|           |             | 50,50,50        | 0.0075  | 0.0068   | 0.0068 | 0.0466  | 0.0125   | 0.0147 | 0.0145  | 0.0057   | 0.0059 | 2.0881      |
|           |             | 100,100,100     | 0.0063  | 0.0035   | 0.0035 | 0.0269  | 0.0064   | 0.0072 | 0.0100  | 0.0031   | 0.0032 | 2.0627      |
|           | Normal      | 200,200,200     | 0.0044  | 0.0019   | 0.0019 | 0.0138  | 0.0034   | 0.0036 | 0.0040  | 0.0018   | 0.0018 | 2.0417      |
|           |             | 200,50,50       | 0.0008  | 0.0034   | 0.0034 | 0.0430  | 0.0103   | 0.0121 | 0.0152  | 0.0059   | 0.0061 | 2.0785      |
|           |             | 30,30,30        | 0.0014  | 0.0064   | 0.0064 | 0.0284  | 0.0141   | 0.0149 | -0.0012 | 0.0068   | 0.0068 | 2.0481      |
|           |             | 50,50,50        | -0.0022 | 0.0037   | 0.0037 | 0.0173  | 0.0088   | 0.0091 | 0.0053  | 0.0033   | 0.0033 | 2.0398      |
| Stepwise  | 100,100,100 | 0.0006          | 0.0017  | 0.0018   | 0.0108 | 0.0047  | 0.0048   | 0.0010 | 0.0017  | 0.0017   | 2.0319 |             |
|           | 200,200,200 | 0.0011          | 0.0009  | 0.0009   | 0.0041 | 0.0022  | 0.0022   | 0.0002 | 0.0008  | 0.0008   | 2.0249 |             |
|           | 200,50,50   | -0.0024         | 0.0014  | 0.0014   | 0.0139 | 0.0081  | 0.0082   | 0.0038 | 0.0037  | 0.0037   | 2.0348 |             |
|           | 30,30,30    | 0.0464          | 0.0109  | 0.0130   | 0.1179 | 0.0201  | 0.0340   | 0.0520 | 0.0101  | 0.0128   | 2.2359 |             |
| Youden    | 50,50,50    | 0.0365          | 0.0079  | 0.0092   | 0.0909 | 0.0151  | 0.0234   | 0.0375 | 0.0078  | 0.0093   | 2.1844 |             |
|           | 100,100,100 | 0.0267          | 0.0057  | 0.0064   | 0.0522 | 0.0105  | 0.0133   | 0.0302 | 0.0051  | 0.0060   | 2.1286 |             |
|           | 200,200,200 | 0.0140          | 0.0036  | 0.0038   | 0.0380 | 0.0072  | 0.0087   | 0.0159 | 0.0037  | 0.0039   | 2.0875 |             |
|           | 200,50,50   | 0.0170          | 0.0050  | 0.0064   | 0.0872 | 0.0123  | 0.0199   | 0.0443 | 0.0077  | 0.0097   | 2.1679 |             |

**Table B.8**

The table provides results based on training data for the normal scenarios with  $\Sigma = 0.5I + 0.5J$ . The table provides the bias, variance, and MSE for  $TCR_1$ ,  $TCR_2$ , and  $TCR_3$  for each of the explored approaches when using the Euclidean distance as the objective function.

| Method    | Approach    | $n_1, n_2, n_3$ | $TCR_1$ |          |        | $TCR_2$ |          |        | $TCR_3$ |          |        | $Sum(TCRs)$ |
|-----------|-------------|-----------------|---------|----------|--------|---------|----------|--------|---------|----------|--------|-------------|
|           |             |                 | Bias    | Variance | MSE    | Bias    | Variance | MSE    | Bias    | Variance | MSE    | Mean        |
| Euclidean | Logistic    | 30,30,30        | 0.0488  | 0.0086   | 0.0110 | 0.0657  | 0.0078   | 0.0121 | 0.0546  | 0.0087   | 0.0117 | 2.0850      |
|           |             | 50,50,50        | 0.0367  | 0.0062   | 0.0076 | 0.0490  | 0.0049   | 0.0073 | 0.0381  | 0.0054   | 0.0068 | 2.0398      |
|           |             | 100,100,100     | 0.0239  | 0.0037   | 0.0043 | 0.0306  | 0.0031   | 0.0040 | 0.0266  | 0.0035   | 0.0042 | 1.9971      |
|           |             | 200,200,200     | 0.0159  | 0.0023   | 0.0026 | 0.0198  | 0.0018   | 0.0022 | 0.0154  | 0.0023   | 0.0026 | 1.9670      |
|           | Yan         | 200,50,50       | 0.0282  | 0.0041   | 0.0049 | 0.0434  | 0.0048   | 0.0066 | 0.0361  | 0.0062   | 0.0075 | 2.0235      |
|           |             | 30,30,30        | 0.0154  | 0.0060   | 0.0063 | 0.0584  | 0.0051   | 0.0086 | 0.0210  | 0.0063   | 0.0067 | 2.0107      |
|           |             | 50,50,50        | 0.0074  | 0.0036   | 0.0036 | 0.0393  | 0.0034   | 0.0049 | 0.0147  | 0.0034   | 0.0036 | 1.9772      |
|           |             | 100,100,100     | 0.0034  | 0.0018   | 0.0018 | 0.0246  | 0.0018   | 0.0024 | 0.0064  | 0.0017   | 0.0017 | 1.9503      |
|           | Normal      | 200,200,200     | 0.0020  | 0.0011   | 0.0011 | 0.0152  | 0.0009   | 0.0011 | -0.0002 | 0.0010   | 0.0010 | 1.9330      |
|           |             | 200,50,50       | 0.0007  | 0.0019   | 0.0019 | 0.0377  | 0.0028   | 0.0042 | 0.0128  | 0.0036   | 0.0038 | 1.9670      |
|           |             | 30,30,30        | 0.0080  | 0.0050   | 0.0051 | 0.0122  | 0.0071   | 0.0073 | 0.0060  | 0.0051   | 0.0051 | 1.9421      |
|           |             | 50,50,50        | 0.0032  | 0.0029   | 0.0029 | 0.0080  | 0.0045   | 0.0046 | 0.0093  | 0.0027   | 0.0028 | 1.9364      |
| Stepwise  | 100,100,100 | 0.0017          | 0.0014  | 0.0014   | 0.0060 | 0.0023  | 0.0023   | 0.0021 | 0.0014  | 0.0014   | 1.9256 |             |
|           | 200,200,200 | 0.0026          | 0.0007  | 0.0007   | 0.0017 | 0.0011  | 0.0011   | 0.0012 | 0.0007  | 0.0007   | 1.9214 |             |
|           | 200,50,50   | 0.0033          | 0.0011  | 0.0011   | 0.0076 | 0.0043  | 0.0043   | 0.0056 | 0.0031  | 0.0031   | 1.9325 |             |
|           | 30,30,30    | 0.0018          | 0.0064  | 0.0064   | 0.0972 | 0.0062  | 0.0156   | 0.0697 | 0.0066  | 0.0115   | 2.1495 |             |
| Youden    | 50,50,50    | -0.0140         | 0.0046  | 0.0048   | 0.0692 | 0.0043  | 0.0091   | 0.0551 | 0.0043  | 0.0073   | 2.0910 |             |
|           | 100,100,100 | -0.0133         | 0.0022  | 0.0023   | 0.0255 | 0.0029  | 0.0035   | 0.0264 | 0.0029  | 0.0036   | 2.0194 |             |
|           | 200,200,200 | -0.0269         | 0.0016  | 0.0023   | 0.0149 | 0.0017  | 0.0019   | 0.0124 | 0.0018  | 0.0020   | 1.9812 |             |
|           | 200,50,50   | -0.0077         | 0.0018  | 0.0019   | 0.0407 | 0.0041  | 0.0058   | 0.0418 | 0.0046  | 0.0063   | 2.0556 |             |
| Euclidean | Logistic    | 30,30,30        | 0.0161  | 0.0150   | 0.0153 | 0.1029  | 0.0273   | 0.0379 | 0.0603  | 0.0136   | 0.0172 | 2.1094      |
|           |             | 50,50,50        | 0.0137  | 0.0113   | 0.0115 | 0.0692  | 0.0210   | 0.0258 | 0.0485  | 0.0092   | 0.0116 | 2.0616      |
|           |             | 100,100,100     | 0.0117  | 0.0069   | 0.0071 | 0.0465  | 0.0133   | 0.0155 | 0.0289  | 0.0067   | 0.0076 | 2.0172      |
|           |             | 200,200,200     | 0.0061  | 0.0046   | 0.0046 | 0.0322  | 0.0090   | 0.0101 | 0.0164  | 0.0050   | 0.0052 | 1.9848      |
|           | Yan         | 200,50,50       | 0.0095  | 0.0075   | 0.0076 | 0.0637  | 0.0178   | 0.0218 | 0.0401  | 0.0102   | 0.0118 | 2.0434      |
|           |             | 30,30,30        | 0.0070  | 0.0121   | 0.0121 | 0.0869  | 0.0228   | 0.0303 | 0.0154  | 0.0122   | 0.0125 | 2.0394      |
|           |             | 50,50,50        | 0.0033  | 0.0087   | 0.0086 | 0.0537  | 0.0145   | 0.0173 | 0.0172  | 0.0066   | 0.0069 | 2.0043      |
|           |             | 100,100,100     | 0.0048  | 0.0042   | 0.0042 | 0.0307  | 0.0081   | 0.0090 | 0.0105  | 0.0039   | 0.0040 | 1.9761      |
|           | Normal      | 200,200,200     | 0.0052  | 0.0023   | 0.0023 | 0.0163  | 0.0043   | 0.0045 | 0.0040  | 0.0021   | 0.0022 | 1.9556      |
|           |             | 200,50,50       | -0.0030 | 0.0045   | 0.0045 | 0.0508  | 0.0130   | 0.0156 | 0.0144  | 0.0073   | 0.0075 | 1.9923      |
|           |             | 30,30,30        | 0.0003  | 0.0075   | 0.0075 | 0.0326  | 0.0168   | 0.0179 | -0.0010 | 0.0078   | 0.0078 | 1.9619      |
|           |             | 50,50,50        | -0.0036 | 0.0043   | 0.0043 | 0.0187  | 0.0101   | 0.0105 | 0.0059  | 0.0037   | 0.0038 | 1.9511      |
| Stepwise  | 100,100,100 | 0.0005          | 0.0020  | 0.0020   | 0.0111 | 0.0054  | 0.0055   | 0.0013 | 0.0019  | 0.0019   | 1.9430 |             |
|           | 200,200,200 | 0.0011          | 0.0011  | 0.0011   | 0.0043 | 0.0026  | 0.0026   | 0.0000 | 0.0009  | 0.0009   | 1.9355 |             |
|           | 200,50,50   | -0.0036         | 0.0017  | 0.0017   | 0.0143 | 0.0096  | 0.0098   | 0.0038 | 0.0044  | 0.0044   | 1.9440 |             |
|           | 30,30,30    | 0.0462          | 0.0123  | 0.0149   | 0.1314 | 0.0235  | 0.0407   | 0.0575 | 0.0122  | 0.0155   | 2.1705 |             |
| Youden    | 50,50,50    | 0.0367          | 0.0095  | 0.0108   | 0.0975 | 0.0184  | 0.0279   | 0.0464 | 0.0092  | 0.0113   | 2.1101 |             |
|           | 100,100,100 | 0.0275          | 0.0062  | 0.0070   | 0.0637 | 0.0118  | 0.0159   | 0.0288 | 0.0063  | 0.0071   | 2.0505 |             |
|           | 200,200,200 | 0.0164          | 0.0038  | 0.0041   | 0.0367 | 0.0076  | 0.0089   | 0.0198 | 0.0039  | 0.0043   | 2.0060 |             |
|           | 200,50,50   | 0.0256          | 0.0062  | 0.0064   | 0.0982 | 0.0139  | 0.0236   | 0.0498 | 0.0088  | 0.0113   | 2.0917 |             |

**Table B.9**

The table provides results based on training data for the normal scenarios with  $\Sigma = 0.3I + 0.7J$ . The table provides the bias, variance, and MSE for  $TCR_1$ ,  $TCR_2$ , and  $TCR_3$  for each of the explored approaches when using the Euclidean distance as the objective function.

| Method    | Approach    | $n_1, n_2, n_3$ | $TCR_1$ |          |        | $TCR_2$ |          |         | $TCR_3$ |          |        | $Sum(TCRs)$ |
|-----------|-------------|-----------------|---------|----------|--------|---------|----------|---------|---------|----------|--------|-------------|
|           |             |                 | Bias    | Variance | MSE    | Bias    | Variance | MSE     | Bias    | Variance | MSE    | Mean        |
| Euclidean | Logistic    | 30,30,30        | 0.0462  | 0.0089   | 0.0110 | 0.0689  | 0.0079   | 0.0079  | 0.0555  | 0.0097   | 0.0128 | 2.0236      |
|           |             | 50,50,50        | 0.0367  | 0.0069   | 0.0082 | 0.0506  | 0.0055   | 0.0055  | 0.0414  | 0.0061   | 0.0078 | 1.9817      |
|           |             | 100,100,100     | 0.0275  | 0.0039   | 0.0047 | 0.0305  | 0.0036   | 0.0036  | 0.0258  | 0.0039   | 0.0046 | 1.9368      |
|           |             | 200,200,200     | 0.0164  | 0.0027   | 0.0030 | 0.0194  | 0.0020   | 0.0020  | 0.0170  | 0.0027   | 0.0030 | 1.9058      |
|           | Yan         | 200,50,50       | 0.0256  | 0.0048   | 0.0055 | 0.0456  | 0.0046   | 0.0067  | 0.0247  | 0.0067   | 0.0081 | 1.9617      |
|           |             | 30,30,30        | 0.0156  | 0.0063   | 0.0066 | 0.0622  | 0.0053   | 0.0092  | 0.0214  | 0.0067   | 0.0071 | 1.9522      |
|           |             | 50,50,50        | 0.0057  | 0.0038   | 0.0039 | 0.0438  | 0.0034   | 0.0053  | 0.0182  | 0.0036   | 0.0039 | 1.9207      |
|           |             | 100,100,100     | 0.0022  | 0.0019   | 0.0019 | 0.0268  | 0.0019   | 0.0026  | 0.0059  | 0.0018   | 0.0018 | 1.8879      |
|           | Normal      | 200,200,200     | 0.0006  | 0.0012   | 0.0012 | 0.0163  | 0.0010   | 0.0013  | -0.0001 | 0.0011   | 0.0011 | 1.8698      |
|           |             | 200,50,50       | -0.0017 | 0.0023   | 0.0023 | 0.0420  | 0.0029   | 0.0047  | 0.0120  | 0.0039   | 0.0041 | 1.9053      |
|           |             | 30,30,30        | 0.0089  | 0.0053   | 0.0054 | 0.0120  | 0.0077   | 0.0078  | 0.0058  | 0.0054   | 0.0055 | 1.8796      |
|           |             | 50,50,50        | 0.0037  | 0.0031   | 0.0031 | 0.0077  | 0.0047   | 0.0048  | 0.0096  | 0.0029   | 0.0030 | 1.8739      |
| Stepwise  | 100,100,100 | 0.0022          | 0.0015  | 0.0015   | 0.0058 | 0.0024  | 0.0024   | 0.0017  | 0.0015  | 0.0015   | 1.8626 |             |
|           | 200,200,200 | 0.0021          | 0.0008  | 0.0008   | 0.0019 | 0.0012  | 0.0012   | 0.0009  | 0.0008  | 0.0008   | 1.8579 |             |
|           | 200,50,50   | 0.0031          | 0.0011  | 0.0011   | 0.0071 | 0.0044  | 0.0044   | 0.0060  | 0.0032  | 0.0032   | 1.8691 |             |
|           | 30,30,30    | 0.0682          | 0.0067  | 0.0114   | 0.0987 | 0.0064  | 0.0161   | 0.0735  | 0.0073  | 0.0127   | 2.0934 |             |
| Yan       | 50,50,50    | 0.0527          | 0.0051  | 0.0079   | 0.0706 | 0.0047  | 0.0097   | 0.0619  | 0.0047  | 0.0085   | 2.0381 |             |
|           | 100,100,100 | 0.0566          | 0.0022  | 0.0055   | 0.0254 | 0.0031  | 0.0038   | 0.0259  | 0.0029  | 0.0036   | 1.9609 |             |
|           | 200,200,200 | 0.0412          | 0.0015  | 0.0032   | 0.0164 | 0.0021  | 0.0021   | 0.0128  | 0.0021  | 0.0023   | 1.9235 |             |
|           | 200,50,50   | 0.0617          | 0.0021  | 0.0060   | 0.0374 | 0.0059  | 0.0059   | 0.0447  | 0.0047  | 0.0067   | 1.9967 |             |
| Youden    | Logistic    | 30,30,30        | 0.0204  | 0.0164   | 0.0168 | 0.1019  | 0.0308   | 0.0412  | 0.0598  | 0.0153   | 0.0189 | 2.0497      |
|           |             | 50,50,50        | 0.0124  | 0.0126   | 0.0128 | 0.0754  | 0.0240   | 0.0297  | 0.0491  | 0.0104   | 0.0128 | 2.0045      |
|           |             | 100,100,100     | 0.0113  | 0.0078   | 0.0079 | 0.0502  | 0.0161   | 0.0186  | 0.0286  | 0.0084   | 0.0092 | 1.9577      |
|           |             | 200,200,200     | 0.0064  | 0.0052   | 0.0053 | 0.0303  | 0.0107   | 0.0116  | 0.0202  | 0.0052   | 0.0056 | 1.9245      |
|           | Normal      | 200,50,50       | 0.0109  | 0.0085   | 0.0086 | 0.0592  | 0.0206   | 0.0241  | 0.0463  | 0.0113   | 0.0135 | 1.9840      |
|           |             | 30,30,30        | -0.0013 | 0.0147   | 0.0147 | 0.1023  | 0.0262   | 0.0367  | 0.0143  | 0.0138   | 0.0140 | 1.9829      |
|           |             | 50,50,50        | -0.0014 | 0.0104   | 0.0104 | 0.0665  | 0.0168   | 0.0212  | 0.0173  | 0.0074   | 0.0077 | 1.9500      |
|           |             | 100,100,100     | 0.0030  | 0.0050   | 0.0050 | 0.0361  | 0.0098   | 0.0111  | 0.0101  | 0.0043   | 0.0044 | 1.9168      |
|           | Stepwise    | 200,200,200     | 0.0048  | 0.0029   | 0.0029 | 0.0196  | 0.0052   | 0.0056  | 0.0032  | 0.0026   | 0.0026 | 1.8953      |
|           |             | 200,50,50       | -0.0066 | 0.0058   | 0.0058 | 0.0602  | 0.0152   | 0.0189  | 0.0147  | 0.0084   | 0.0086 | 1.9358      |
|           |             | 30,30,30        | -0.0004 | 0.0082   | 0.0082 | 0.0351  | 0.0191   | 0.0203  | -0.0007 | 0.0083   | 0.0083 | 1.9017      |
|           |             | 50,50,50        | -0.0047 | 0.0048   | 0.0048 | 0.0197  | 0.0115   | 0.0119  | 0.0054  | 0.0040   | 0.0040 | 1.8880      |
| Yan       | 100,100,100 | 0.0001          | 0.0023  | 0.0023   | 0.0107 | 0.0060  | 0.0061   | 0.0006  | 0.0021  | 0.0021   | 1.8790 |             |
|           | 200,200,200 | 0.0010          | 0.0012  | 0.0012   | 0.0046 | 0.0029  | 0.0030   | -0.0005 | 0.0011  | 0.0011   | 1.8727 |             |
|           | 200,50,50   | -0.0047         | 0.0020  | 0.0020   | 0.0156 | 0.0105  | 0.0107   | 0.0023  | 0.0049  | 0.0049   | 1.8809 |             |
|           | 30,30,30    | 0.0523          | 0.0137  | 0.0165   | 0.1434 | 0.0263  | 0.0469   | 0.0551  | 0.0131  | 0.0162   | 2.1183 |             |
| Normal    | 50,50,50    | 0.0376          | 0.0102  | 0.0117   | 0.1042 | 0.0185  | 0.0293   | 0.0494  | 0.0097  | 0.0122   | 2.0587 |             |
|           | 100,100,100 | 0.0307          | 0.0068  | 0.0077   | 0.0623 | 0.0154  | 0.0193   | 0.0328  | 0.0071  | 0.0081   | 1.9934 |             |
|           | 200,200,200 | 0.0213          | 0.0043  | 0.0047   | 0.0404 | 0.0087  | 0.0104   | 0.0199  | 0.0050  | 0.0054   | 1.9492 |             |
|           | 200,50,50   | 0.0149          | 0.0070  | 0.0072   | 0.1050 | 0.0167  | 0.0266   | 0.0494  | 0.0102  | 0.0126   | 2.0370 |             |

# Web -Appendix C (Simulation Results for Scenarios Generated from Lognormal Distributions)

## Table C.1

The table provides results for the lognormal scenarios with  $\rho = 0.7I+0.3J$ . The table provides the point estimate and variance for  $TCR_1$ ,  $TCR_2$ , and  $TCR_3$ , as well as the  $Sum(\widehat{TCRs})$ .

| Method    | Approach    | $n_1, n_2, n_3$ | $Var(\widehat{TCR}_1)$ | $Var(\widehat{TCR}_2)$ | $Var(\widehat{TCR}_3)$ | $\widehat{TCR}_1$ | $\widehat{TCR}_2$ | $\widehat{TCR}_3$ | $Sum(\widehat{TCRs})$ |        |
|-----------|-------------|-----------------|------------------------|------------------------|------------------------|-------------------|-------------------|-------------------|-----------------------|--------|
| Euclidean | Logistic    | 30,30,30        | 0.0094                 | 0.0083                 | 0.0124                 | 0.5554            | 0.4794            | 0.6813            | 1.7162                |        |
|           |             | 50,50,50        | 0.0069                 | 0.0057                 | 0.0084                 | 0.5588            | 0.4948            | 0.6728            | 1.7264                |        |
|           |             | 100,100,100     | 0.0042                 | 0.0033                 | 0.0057                 | 0.5628            | 0.4995            | 0.6784            | 1.7406                |        |
|           |             | 200,200,200     | 0.0028                 | 0.0023                 | 0.0035                 | 0.5606            | 0.5065            | 0.6801            | 1.7473                |        |
|           |             | 200,50,50       | 0.0046                 | 0.0049                 | 0.0092                 | 0.5907            | 0.4723            | 0.6649            | 1.7279                |        |
|           | Yan         | 30,30,30        | 0.0045                 | 0.0031                 | 0.0071                 | 0.5551            | 0.4777            | 0.6505            | 1.6834                |        |
|           |             | 50,50,50        | 0.0030                 | 0.0018                 | 0.0043                 | 0.5581            | 0.4906            | 0.6537            | 1.7024                |        |
|           |             | 100,100,100     | 0.0017                 | 0.0009                 | 0.0023                 | 0.5621            | 0.5023            | 0.6626            | 1.7271                |        |
|           |             | 200,200,200     | 0.0010                 | 0.0005                 | 0.0012                 | 0.5619            | 0.5085            | 0.6682            | 1.7387                |        |
|           |             | 200,50,50       | 0.0021                 | 0.0015                 | 0.0042                 | 0.5687            | 0.4855            | 0.6551            | 1.7094                |        |
|           | Box-Cox     | 30,30,30        | 0.0022                 | 0.0014                 | 0.0033                 | 0.5728            | 0.5163            | 0.6881            | 1.7772                |        |
|           |             | 50,50,50        | 0.0013                 | 0.0008                 | 0.0017                 | 0.5739            | 0.5244            | 0.6896            | 1.7880                |        |
|           |             | 100,100,100     | 0.0009                 | 0.0006                 | 0.0014                 | 0.5766            | 0.5286            | 0.6908            | 1.7960                |        |
|           |             | 200,200,200     | 0.0003                 | 0.0002                 | 0.0004                 | 0.5777            | 0.5312            | 0.6928            | 1.8017                |        |
|           |             | 200,50,50       | 0.0010                 | 0.0007                 | 0.0022                 | 0.5777            | 0.5251            | 0.6882            | 1.7910                |        |
|           |             | Stepwise        | 30,30,30               | 0.0087                 | 0.0084                 | 0.0111            | 0.5486            | 0.4463            | 0.6849                | 1.6798 |
|           |             |                 | 50,50,50               | 0.0064                 | 0.0056                 | 0.0074            | 0.5492            | 0.4666            | 0.6843                | 1.7001 |
|           |             |                 | 100,100,100            | 0.0038                 | 0.0031                 | 0.0046            | 0.5551            | 0.4825            | 0.6852                | 1.7228 |
|           |             |                 | 200,200,200            | 0.0025                 | 0.0021                 | 0.0030            | 0.5578            | 0.4927            | 0.6842                | 1.7347 |
|           |             |                 | 200,50,50              | 0.0040                 | 0.0046                 | 0.0075            | 0.5844            | 0.4464            | 0.6811                | 1.7119 |
| Logistic  | 30,30,30    | 0.0192          | 0.0236                 | 0.0144                 | 0.5618                 | 0.3606            | 0.7930            | 1.7153            |                       |        |
|           | 50,50,50    | 0.0146          | 0.0198                 | 0.0113                 | 0.5695                 | 0.3745            | 0.7885            | 1.7324            |                       |        |
|           | 100,100,100 | 0.0095          | 0.0141                 | 0.0076                 | 0.5827                 | 0.3676            | 0.8025            | 1.7529            |                       |        |
|           | 200,200,200 | 0.0071          | 0.0103                 | 0.0046                 | 0.5885                 | 0.3641            | 0.8116            | 1.7641            |                       |        |
|           | 200,50,50   | 0.0090          | 0.0170                 | 0.0121                 | 0.6231                 | 0.3268            | 0.7850            | 1.7350            |                       |        |
|           | Yan         | 30,30,30        | 0.0155                 | 0.0163                 | 0.0095                 | 0.5750            | 0.3688            | 0.7603            | 1.7041                |        |
|           |             | 50,50,50        | 0.0113                 | 0.0112                 | 0.0065                 | 0.5839            | 0.3684            | 0.7735            | 1.7259                |        |
|           |             | 100,100,100     | 0.0065                 | 0.0070                 | 0.0031                 | 0.5938            | 0.3679            | 0.7926            | 1.7543                |        |
|           |             | 200,200,200     | 0.0040                 | 0.0040                 | 0.0016                 | 0.5968            | 0.3669            | 0.8043            | 1.7680                |        |
|           |             | 200,50,50       | 0.0081                 | 0.0073                 | 0.0058                 | 0.5936            | 0.3708            | 0.7718            | 1.7362                |        |
| Youden    | 30,30,30    | 0.0060          | 0.0065                 | 0.0033                 | 0.5910                 | 0.4075            | 0.7992            | 1.7976            |                       |        |
|           | 50,50,50    | 0.0036          | 0.0038                 | 0.0016                 | 0.5928                 | 0.4106            | 0.8081            | 1.8115            |                       |        |
|           | 100,100,100 | 0.0020          | 0.0023                 | 0.0015                 | 0.6016                 | 0.4057            | 0.8139            | 1.8212            |                       |        |
|           | 200,200,200 | 0.0008          | 0.0010                 | 0.0004                 | 0.6043                 | 0.4052            | 0.8183            | 1.8277            |                       |        |
|           | 200,50,50   | 0.0026          | 0.0030                 | 0.0023                 | 0.5973                 | 0.4100            | 0.8085            | 1.8158            |                       |        |
|           | Stepwise    | 30,30,30        | 0.0171                 | 0.0179                 | 0.0137                 | 0.5472            | 0.3630            | 0.7717            | 1.6818                |        |
|           |             | 50,50,50        | 0.0142                 | 0.0154                 | 0.0090                 | 0.5578            | 0.3630            | 0.7854            | 1.7062                |        |
|           |             | 100,100,100     | 0.0096                 | 0.0123                 | 0.0062                 | 0.5703            | 0.3658            | 0.8000            | 1.7361                |        |
|           |             | 200,200,200     | 0.0070                 | 0.0082                 | 0.0037                 | 0.5784            | 0.3666            | 0.8088            | 1.7538                |        |
|           |             | 200,50,50       | 0.0103                 | 0.0133                 | 0.0097                 | 0.5855            | 0.3537            | 0.7835            | 1.7227                |        |



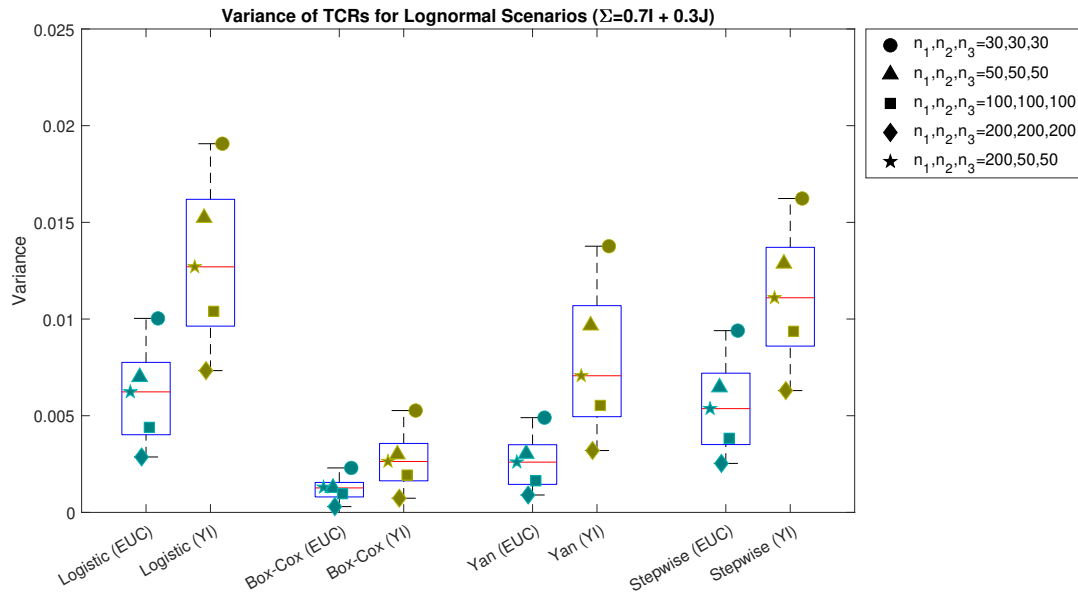

Figure 5: The plot displays the average of the variances of  $\widehat{TCR}_1$ ,  $\widehat{TCR}_2$ , and  $\widehat{TCR}_3$  for each sample size explored. For all explored scenarios, the Euclidean method had smaller variances for the  $\widehat{TCR}$ s than the Youden index.

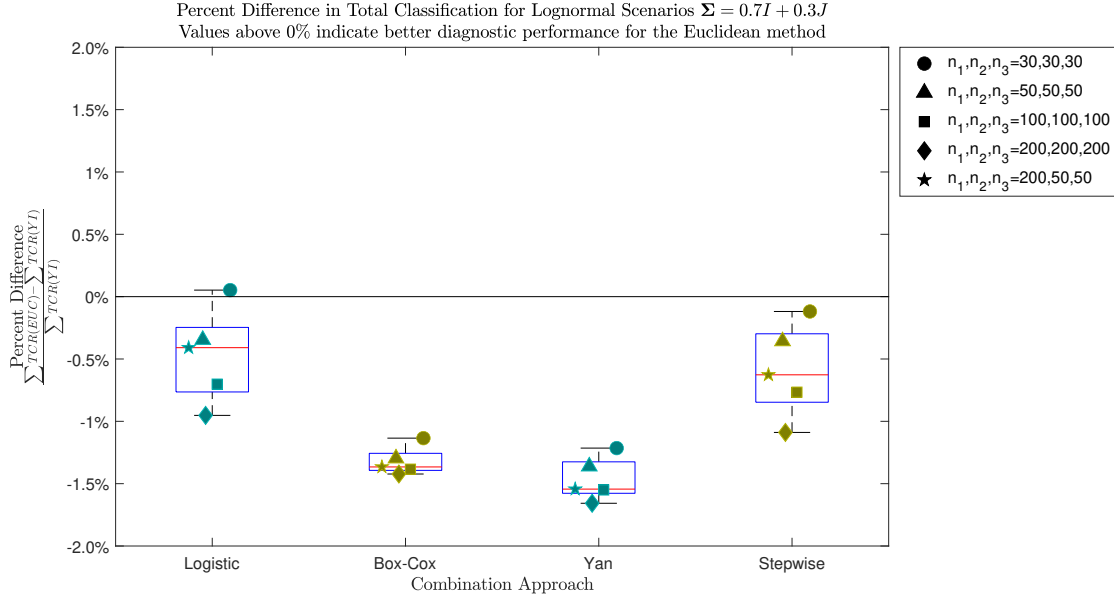

Figure 6: The plot displays the percent difference in  $\sum_i \widehat{TCR}_i$ ,  $i = 1, 2, 3$ , i.e. total classification, for the Euclidean method (EUC) versus the Youden index (YI) for each of the combination approaches and sample sizes, where the correlation matrix is  $\Sigma = 0.7I + 0.3J$ . The percent difference is calculated by  $\frac{\sum \widehat{TCR}(EUC) - \sum \widehat{TCR}(YI)}{\sum \widehat{TCR}(YI)}$ . Values above 0% correspond to a higher total classification for the Euclidean method than the Youden index, indicating better diagnostic performance for the Euclidean method. The Youden index saw higher total classification than the Euclidean method for all scenarios except when the sample size is  $(n_1, n_2, n_3) = (30, 30, 30)$ , and when using logistic regression to combine the scores. The difference in total classification was less than 2% higher for the Youden index in all scenarios.

## Table C.2

The table provides results for the lognormal scenarios with  $\rho = 0.5I + 0.5J$ . The table provides the point estimate and variance for  $TCR_1$ ,  $TCR_2$ , and  $TCR_3$ , as well as the  $Sum(\widehat{TCRs})$ .

| Method   | Approach  | $n_1, n_2, n_3$ | $Var(\widehat{TCR}_1)$ | $Var(\widehat{TCR}_2)$ | $Var(\widehat{TCR}_3)$ | $\widehat{TCR}_1$ | $\widehat{TCR}_2$ | $\widehat{TCR}_3$ | $Sum(\widehat{TCRs})$ |        |
|----------|-----------|-----------------|------------------------|------------------------|------------------------|-------------------|-------------------|-------------------|-----------------------|--------|
|          | Logistic  | 30,30,30        | 0.0103                 | 0.0087                 | 0.0131                 | 0.5388            | 0.4569            | 0.6679            | 1.6635                |        |
|          |           | 50,50,50        | 0.0075                 | 0.0061                 | 0.0090                 | 0.5433            | 0.4733            | 0.6584            | 1.6705                |        |
|          |           | 100,100,100     | 0.0046                 | 0.0037                 | 0.0068                 | 0.5481            | 0.4782            | 0.6620            | 1.6883                |        |
|          |           | 200,200,200     | 0.0028                 | 0.0024                 | 0.0038                 | 0.5481            | 0.4849            | 0.6624            | 1.6955                |        |
|          |           | 200,50,50       | 0.0050                 | 0.0052                 | 0.0101                 | 0.5854            | 0.4479            | 0.6383            | 1.6717                |        |
|          | Yan       | 30,30,30        | 0.0048                 | 0.0028                 | 0.0080                 | 0.5454            | 0.4635            | 0.6261            | 1.6350                |        |
|          |           | 50,50,50        | 0.0033                 | 0.0016                 | 0.0047                 | 0.5473            | 0.4737            | 0.6314            | 1.6524                |        |
|          |           | 100,100,100     | 0.0018                 | 0.0009                 | 0.0027                 | 0.5495            | 0.4835            | 0.6415            | 1.6745                |        |
|          |           | 200,200,200     | 0.0011                 | 0.0005                 | 0.0015                 | 0.5500            | 0.4882            | 0.6476            | 1.6858                |        |
|          |           | 200,50,50       | 0.0023                 | 0.0013                 | 0.0047                 | 0.5565            | 0.4676            | 0.6342            | 1.6584                |        |
|          | Euclidean | Box-Cox         | 30,30,30               | 0.0026                 | 0.0014                 | 0.0037            | 0.5495            | 0.4888            | 0.6655                | 1.7038 |
|          |           |                 | 50,50,50               | 0.0018                 | 0.0010                 | 0.0025            | 0.5500            | 0.4961            | 0.6662                | 1.7124 |
|          |           |                 | 100,100,100            | 0.0010                 | 0.0006                 | 0.0015            | 0.5538            | 0.5004            | 0.6682                | 1.7224 |
|          |           |                 | 200,200,200            | 0.0004                 | 0.0002                 | 0.0005            | 0.5547            | 0.5030            | 0.6707                | 1.7283 |
|          |           |                 | 200,50,50              | 0.0008                 | 0.0004                 | 0.0019            | 0.5549            | 0.4977            | 0.6664                | 1.7190 |
| Stepwise |           | 30,30,30        | 0.0090                 | 0.0081                 | 0.0121                 | 0.5368            | 0.4339            | 0.6678            | 1.6385                |        |
|          |           | 50,50,50        | 0.0069                 | 0.0063                 | 0.0082                 | 0.5421            | 0.4471            | 0.6633            | 1.6525                |        |
|          |           | 100,100,100     | 0.0039                 | 0.0035                 | 0.0054                 | 0.5448            | 0.4639            | 0.6662            | 1.6749                |        |
|          |           | 200,200,200     | 0.0027                 | 0.0023                 | 0.0034                 | 0.5463            | 0.4749            | 0.6651            | 1.6862                |        |
|          |           | 200,50,50       | 0.0044                 | 0.0047                 | 0.0079                 | 0.5747            | 0.4283            | 0.6637            | 1.6666                |        |
|          |           | Logistic        | 30,30,30               | 0.0197                 | 0.0237                 | 0.0175            | 0.5516            | 0.3318            | 0.7789                | 1.6623 |
|          |           |                 | 50,50,50               | 0.0139                 | 0.0200                 | 0.0124            | 0.5606            | 0.3443            | 0.7790                | 1.6839 |
|          |           |                 | 100,100,100            | 0.0098                 | 0.0149                 | 0.0081            | 0.5726            | 0.3341            | 0.7969                | 1.7035 |
|          |           |                 | 200,200,200            | 0.0067                 | 0.0106                 | 0.0051            | 0.5818            | 0.3275            | 0.8060                | 1.7152 |
|          |           |                 | 200,50,50              | 0.0091                 | 0.0175                 | 0.0143            | 0.6242            | 0.2840            | 0.7723                | 1.6804 |
|          | Yan       | 30,30,30        | 0.0206                 | 0.0199                 | 0.0142                 | 0.5605            | 0.3509            | 0.7424            | 1.6538                |        |
|          |           | 50,50,50        | 0.0140                 | 0.0144                 | 0.0080                 | 0.5732            | 0.3433            | 0.7603            | 1.6768                |        |
|          |           | 100,100,100     | 0.0080                 | 0.0093                 | 0.0039                 | 0.5855            | 0.3348            | 0.7835            | 1.7038                |        |
|          |           | 200,200,200     | 0.0050                 | 0.0053                 | 0.0020                 | 0.5882            | 0.3327            | 0.7970            | 1.7179                |        |
|          |           | 200,50,50       | 0.0099                 | 0.0096                 | 0.0072                 | 0.5858            | 0.3406            | 0.7611            | 1.6876                |        |
|          | Youden    | Box-Cox         | 30,30,30               | 0.0096                 | 0.0097                 | 0.0055            | 0.5643            | 0.3691            | 0.7899                | 1.7233 |
|          |           |                 | 50,50,50               | 0.0057                 | 0.0056                 | 0.0027            | 0.5680            | 0.3699            | 0.7995                | 1.7373 |
|          |           |                 | 100,100,100            | 0.0026                 | 0.0029                 | 0.0017            | 0.5798            | 0.3633            | 0.8072                | 1.7503 |
|          |           |                 | 200,200,200            | 0.0012                 | 0.0014                 | 0.0005            | 0.5827            | 0.3623            | 0.8122                | 1.7573 |
|          |           |                 | 200,50,50              | 0.0034                 | 0.0038                 | 0.0021            | 0.5737            | 0.3705            | 0.8018                | 1.7460 |
| Stepwise |           | 30,30,30        | 0.0191                 | 0.0195                 | 0.0156                 | 0.5393            | 0.3354            | 0.7647            | 1.6394                |        |
|          |           | 50,50,50        | 0.0157                 | 0.0164                 | 0.0113                 | 0.5479            | 0.3466            | 0.7682            | 1.6627                |        |
|          |           | 100,100,100     | 0.0109                 | 0.0126                 | 0.0070                 | 0.5591            | 0.3409            | 0.7914            | 1.6915                |        |
|          |           | 200,200,200     | 0.0083                 | 0.0094                 | 0.0046                 | 0.5714            | 0.3346            | 0.8012            | 1.7072                |        |
|          |           | 200,50,50       | 0.0115                 | 0.0139                 | 0.0108                 | 0.5775            | 0.3249            | 0.7772            | 1.6796                |        |

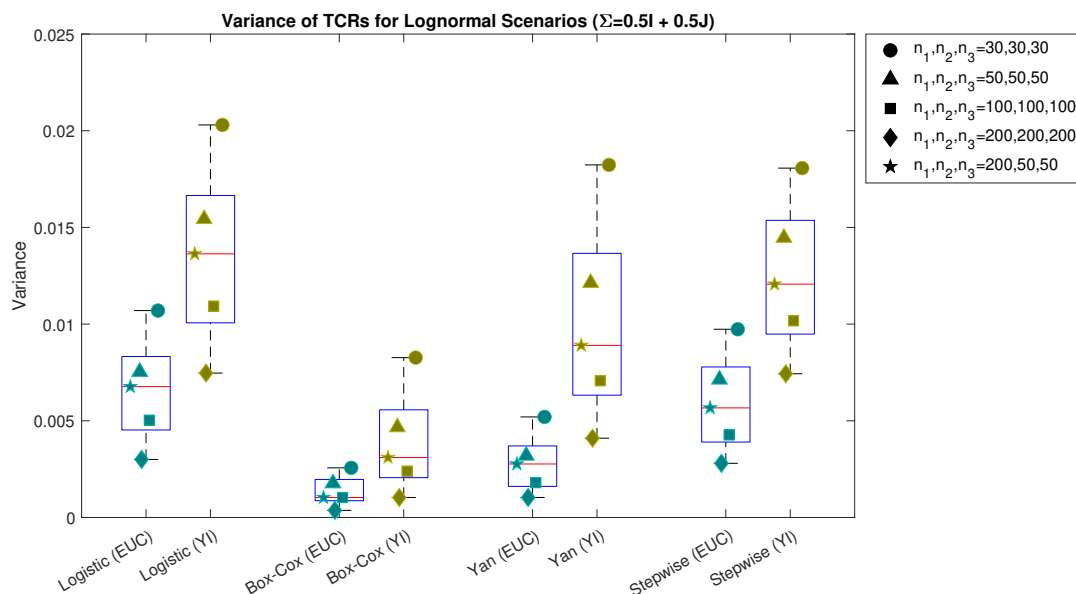

Figure 7: The plot displays the average of the variances of  $\widehat{TCR}_1$ ,  $\widehat{TCR}_2$ , and  $\widehat{TCR}_3$  for each sample size explored. For all explored scenarios, the Euclidean method had smaller variances for the  $\widehat{TCR}$ s than the Youden index.

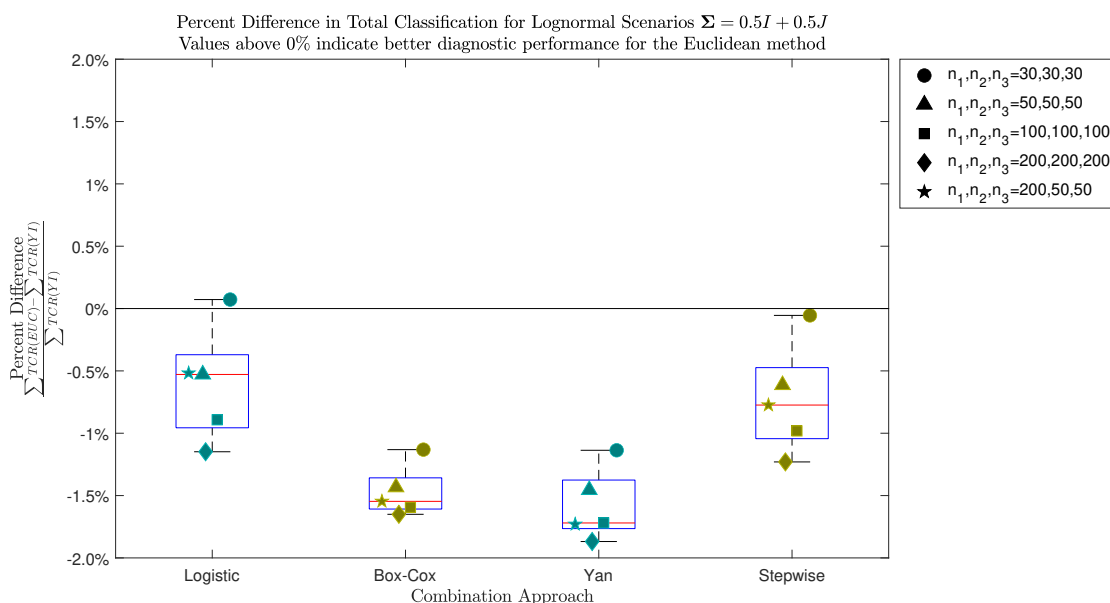

Figure 8: The plot displays the percent difference in  $\sum_i TCR_i$ ,  $i = 1, 2, 3$ , i.e. total classification, for the Euclidean method (EUC) versus the Youden index (YI) for each of the combination approaches and sample sizes, where  $\Sigma = 0.5I + 0.5J$ . The percent difference is calculated by  $\frac{\sum TCR(EUC) - \sum TCR(YI)}{\sum TCR(YI)}$ . Values above 0% correspond to a higher total classification for the Euclidean method than the Youden index, indicating better diagnostic performance for the Euclidean method. The only scenario where the Euclidean method saw higher total classification was when the sample size was 30 for each group and the combination approach used was logistic regression. The difference in total classification was less than 2% for all scenarios.

### Table C.3

The table provides results for the lognormal scenarios with  $\rho = 0.3I + 0.7J$ . The table provides the point estimate and variance for  $TCR_1$ ,  $TCR_2$ , and  $TCR_3$ , as well as the  $Sum(\widehat{TCRs})$ .

| Method   | Approach  | $n_1, n_2, n_3$ | $Var(\widehat{TCR}_1)$ | $Var(\widehat{TCR}_2)$ | $Var(\widehat{TCR}_3)$ | $\widehat{TCR}_1$ | $\widehat{TCR}_2$ | $\widehat{TCR}_3$ | $Sum(\widehat{TCRs})$ |        |
|----------|-----------|-----------------|------------------------|------------------------|------------------------|-------------------|-------------------|-------------------|-----------------------|--------|
|          | Logistic  | 30,30,30        | 0.0120                 | 0.0084                 | 0.0152                 | 0.5384            | 0.4463            | 0.6520            | 1.6367                |        |
|          |           | 50,50,50        | 0.0076                 | 0.0062                 | 0.0097                 | 0.5408            | 0.4653            | 0.6472            | 1.6533                |        |
|          |           | 100,100,100     | 0.0047                 | 0.0037                 | 0.0068                 | 0.5481            | 0.4674            | 0.6525            | 1.6681                |        |
|          |           | 200,200,200     | 0.0030                 | 0.0023                 | 0.0041                 | 0.5461            | 0.4758            | 0.6533            | 1.6752                |        |
|          |           | 200,50,50       | 0.0092                 | 0.0055                 | 0.0113                 | 0.5921            | 0.4342            | 0.6077            | 1.6340                |        |
|          | Yan       | 30,30,30        | 0.0057                 | 0.0025                 | 0.0086                 | 0.5462            | 0.4585            | 0.6173            | 1.6220                |        |
|          |           | 50,50,50        | 0.0038                 | 0.0016                 | 0.0056                 | 0.5494            | 0.4672            | 0.6190            | 1.6357                |        |
|          |           | 100,100,100     | 0.0021                 | 0.0008                 | 0.0031                 | 0.5522            | 0.4749            | 0.6289            | 1.6560                |        |
|          |           | 200,200,200     | 0.0013                 | 0.0005                 | 0.0018                 | 0.5517            | 0.4790            | 0.6363            | 1.6670                |        |
|          |           | 200,50,50       | 0.0025                 | 0.0012                 | 0.0050                 | 0.5582            | 0.4623            | 0.6221            | 1.6426                |        |
|          | Euclidean | Box-Cox         | 30,30,30               | 0.0031                 | 0.0014                 | 0.0044            | 0.5417            | 0.4725            | 0.6529                | 1.6671 |
|          |           |                 | 50,50,50               | 0.0021                 | 0.0010                 | 0.0029            | 0.5428            | 0.4793            | 0.6530                | 1.6751 |
|          |           |                 | 100,100,100            | 0.0014                 | 0.0008                 | 0.0021            | 0.5456            | 0.4829            | 0.6550                | 1.6834 |
|          |           |                 | 200,200,200            | 0.0004                 | 0.0002                 | 0.0006            | 0.5470            | 0.4858            | 0.6584                | 1.6912 |
|          |           |                 | 200,50,50              | 0.0009                 | 0.0004                 | 0.0022            | 0.5469            | 0.4809            | 0.6537                | 1.6816 |
|          |           | Stepwise        | 30,30,30               | 0.0101                 | 0.0084                 | 0.0137            | 0.5389            | 0.4232            | 0.6490                | 1.6111 |
|          |           |                 | 50,50,50               | 0.0073                 | 0.0061                 | 0.0091            | 0.5407            | 0.4394            | 0.6502                | 1.6303 |
|          |           |                 | 100,100,100            | 0.0048                 | 0.0037                 | 0.0060            | 0.5485            | 0.4512            | 0.6513                | 1.6510 |
|          |           |                 | 200,200,200            | 0.0031                 | 0.0022                 | 0.0039            | 0.5496            | 0.4627            | 0.6490                | 1.6612 |
|          |           |                 | 200,50,50              | 0.0051                 | 0.0052                 | 0.0088            | 0.5714            | 0.4218            | 0.6486                | 1.6417 |
| Youden   |           | Logistic        | 30,30,30               | 0.0209                 | 0.0238                 | 0.0207            | 0.5535            | 0.3198            | 0.7663                | 1.6396 |
|          |           |                 | 50,50,50               | 0.0146                 | 0.0198                 | 0.0146            | 0.5632            | 0.3292            | 0.7701                | 1.6626 |
|          |           |                 | 100,100,100            | 0.0099                 | 0.0144                 | 0.0090            | 0.5773            | 0.3115            | 0.7956                | 1.6844 |
|          |           |                 | 200,200,200            | 0.0065                 | 0.0104                 | 0.0055            | 0.5808            | 0.3143            | 0.8024                | 1.6975 |
|          |           |                 | 200,50,50              | 0.0130                 | 0.0173                 | 0.0177            | 0.6393            | 0.2619            | 0.7455                | 1.6468 |
|          | Yan       | 30,30,30        | 0.0249                 | 0.0232                 | 0.0197                 | 0.5693            | 0.3344            | 0.7347            | 1.6383                |        |
|          |           | 50,50,50        | 0.0185                 | 0.0178                 | 0.0103                 | 0.5752            | 0.3262            | 0.7618            | 1.6633                |        |
|          |           | 100,100,100     | 0.0097                 | 0.0104                 | 0.0048                 | 0.5908            | 0.3146            | 0.7820            | 1.6874                |        |
|          |           | 200,200,200     | 0.0059                 | 0.0060                 | 0.0024                 | 0.5928            | 0.3115            | 0.7969            | 1.7013                |        |
|          |           | 200,50,50       | 0.0107                 | 0.0117                 | 0.0095                 | 0.5937            | 0.3204            | 0.7600            | 1.6741                |        |
|          | Box-Cox   | 30,30,30        | 0.0159                 | 0.0139                 | 0.0079                 | 0.5504            | 0.3471            | 0.7878            | 1.6853                |        |
|          |           | 50,50,50        | 0.0089                 | 0.0077                 | 0.0040                 | 0.5590            | 0.3441            | 0.7980            | 1.7011                |        |
|          |           | 100,100,100     | 0.0040                 | 0.0037                 | 0.0025                 | 0.5724            | 0.3343            | 0.8072            | 1.7139                |        |
|          |           | 200,200,200     | 0.0016                 | 0.0017                 | 0.0006                 | 0.5771            | 0.3328            | 0.8133            | 1.7231                |        |
|          |           | 200,50,50       | 0.0054                 | 0.0051                 | 0.0024                 | 0.5641            | 0.3445            | 0.8019            | 1.7105                |        |
| Stepwise |           | 30,30,30        | 0.0232                 | 0.0209                 | 0.0205                 | 0.5375            | 0.3267            | 0.7546            | 1.6187                |        |
|          |           | 50,50,50        | 0.0184                 | 0.0170                 | 0.0125                 | 0.5472            | 0.3304            | 0.7655            | 1.6432                |        |
|          |           | 100,100,100     | 0.0137                 | 0.0127                 | 0.0076                 | 0.5548            | 0.3282            | 0.7857            | 1.6687                |        |
|          |           | 200,200,200     | 0.0103                 | 0.0105                 | 0.0049                 | 0.5665            | 0.3193            | 0.7991            | 1.6850                |        |
|          |           | 200,50,50       | 0.0145                 | 0.0144                 | 0.0115                 | 0.5741            | 0.3089            | 0.7754            | 1.6584                |        |

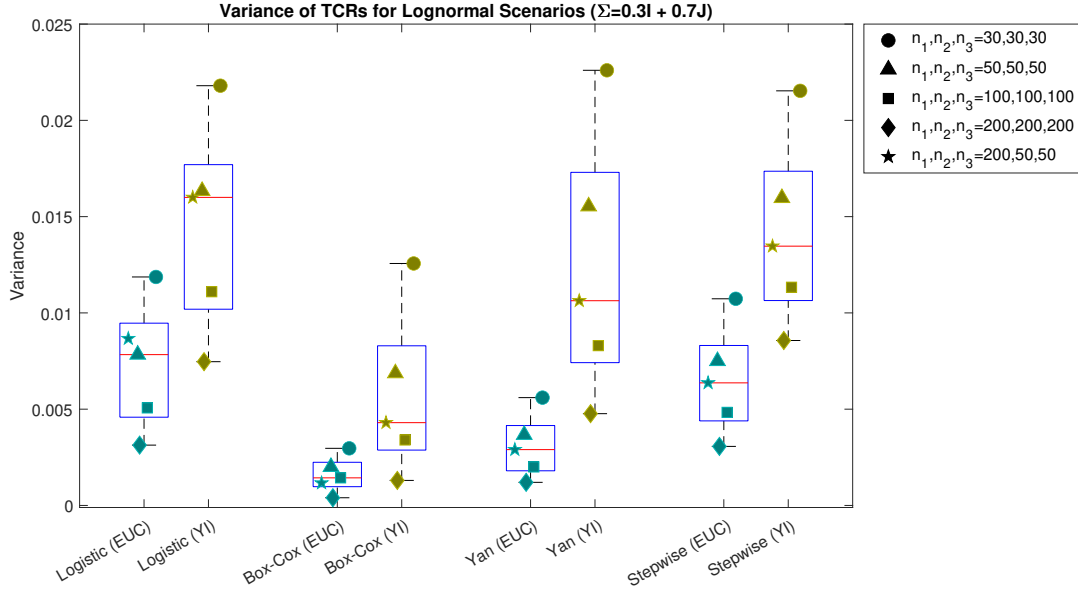

Figure 9: The plot displays the average of the variances of  $\widehat{TCR}_1$ ,  $\widehat{TCR}_2$ , and  $\widehat{TCR}_3$  for each sample size explored. For all explored scenarios, the Euclidean method had smaller variances for the  $\widehat{TCR}$ s than the Youden index.

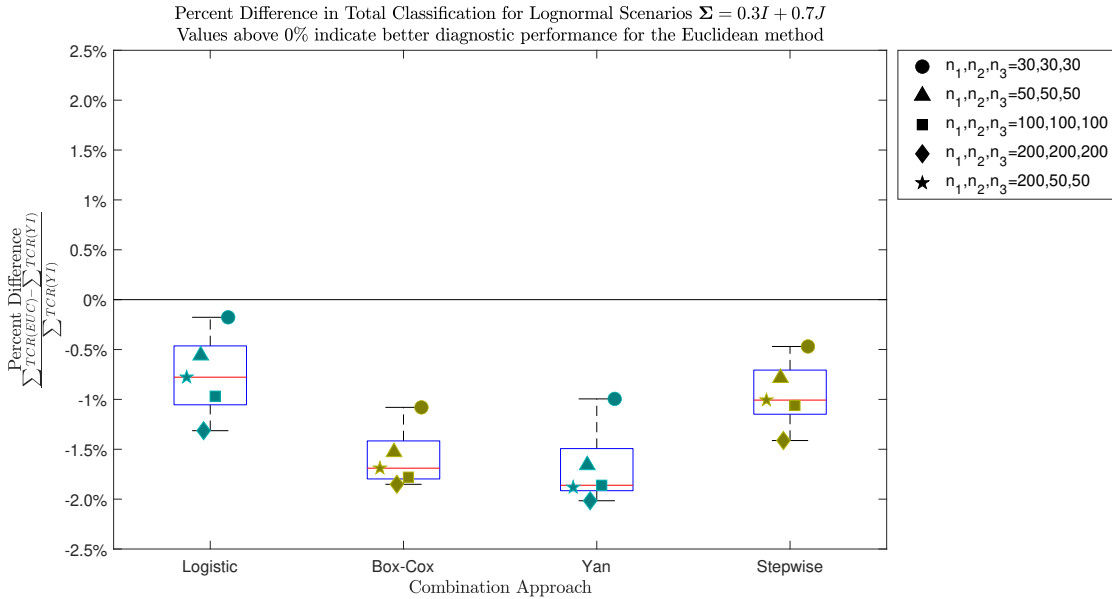

Figure 10: The plot displays the percent difference in  $\sum_i TCR_i$ ,  $i = 1, 2, 3$ , i.e. total classification, for the Euclidean method (EUC) versus the Youden index (YI) for each of the combination approaches and sample sizes, where  $\Sigma = 0.3I + 0.7J$ . The percent difference is calculated by  $\frac{\sum TCR(EUC) - \sum TCR(YI)}{\sum TCR(YI)}$ . Values above 0% correspond to a higher total classification for the Euclidean method than the Youden index, indicating better diagnostic performance for the Euclidean method. The Youden index saw higher total classification for all scenarios, but the difference was an improvement of approximately 2% or less.

**Table C.4**

The table provides results based on training data for the lognormal scenarios with  $\rho = 0.7I + 0.3J$ . The table provides the point estimate and variance for  $TCR_1$ ,  $TCR_2$ , and  $TCR_3$ , as well as the  $Sum(\overline{TCRs})$ .

| Method    | Approach  | $n_1, n_2, n_3$ | $\overline{TCR}_1$ | $\overline{TCR}_2$ | $\overline{TCR}_3$ | $Var(\overline{TCR}_1)$ | $Var(\overline{TCR}_2)$ | $Var(\overline{TCR}_3)$ | $Sum(\overline{TCRs})$ |        |
|-----------|-----------|-----------------|--------------------|--------------------|--------------------|-------------------------|-------------------------|-------------------------|------------------------|--------|
| Euclidean | Logistic  | 30,30,30        | 0.6258             | 0.5808             | 0.7227             | 0.0103                  | 0.0094                  | 0.0106                  | 1.9294                 |        |
|           |           | 50,50,50        | 0.6060             | 0.5677             | 0.7086             | 0.0075                  | 0.0061                  | 0.0072                  | 1.8823                 |        |
|           |           | 100,100,100     | 0.5933             | 0.5480             | 0.7011             | 0.0042                  | 0.0035                  | 0.0047                  | 1.8424                 |        |
|           |           | 200,200,200     | 0.5797             | 0.5355             | 0.6944             | 0.0029                  | 0.0024                  | 0.0031                  | 1.8095                 |        |
|           |           | 200,50,50       | 0.6066             | 0.5470             | 0.6988             | 0.0049                  | 0.0055                  | 0.0079                  | 1.8524                 |        |
|           | Yan       | 30,30,30        | 0.6096             | 0.5865             | 0.6815             | 0.0080                  | 0.0057                  | 0.0070                  | 1.8776                 |        |
|           |           | 50,50,50        | 0.5940             | 0.5643             | 0.6799             | 0.0047                  | 0.0035                  | 0.0044                  | 1.8382                 |        |
|           |           | 100,100,100     | 0.5841             | 0.5456             | 0.6775             | 0.0022                  | 0.0020                  | 0.0021                  | 1.8072                 |        |
|           |           | 200,200,200     | 0.5772             | 0.5318             | 0.6759             | 0.0013                  | 0.0011                  | 0.0012                  | 1.7849                 |        |
|           |           | 200,50,50       | 0.5801             | 0.5614             | 0.6828             | 0.0023                  | 0.0032                  | 0.0041                  | 1.8243                 |        |
|           | Box-Cox   | Euclidean       | 30,30,30           | 0.5970             | 0.5482             | 0.6992                  | 0.0059                  | 0.0074                  | 0.0046                 | 1.8443 |
|           |           |                 | 50,50,50           | 0.5859             | 0.5422             | 0.7010                  | 0.0034                  | 0.0049                  | 0.0025                 | 1.8291 |
|           |           |                 | 100,100,100        | 0.5854             | 0.5395             | 0.6966                  | 0.0016                  | 0.0026                  | 0.0013                 | 1.8214 |
|           |           |                 | 200,200,200        | 0.5819             | 0.5344             | 0.6942                  | 0.0008                  | 0.0012                  | 0.0006                 | 1.8105 |
|           |           |                 | 200,50,50          | 0.5825             | 0.5396             | 0.6999                  | 0.0012                  | 0.0049                  | 0.0025                 | 1.8221 |
| Stepwise  |           | 30,30,30        | 0.6542             | 0.6214             | 0.7541             | 0.0076                  | 0.0073                  | 0.0077                  | 2.0297                 |        |
|           |           | 50,50,50        | 0.6244             | 0.5961             | 0.7375             | 0.0055                  | 0.0050                  | 0.0055                  | 1.9579                 |        |
|           |           | 100,100,100     | 0.6050             | 0.5673             | 0.7206             | 0.0037                  | 0.0032                  | 0.0036                  | 1.8928                 |        |
|           |           | 200,200,200     | 0.5907             | 0.5453             | 0.7062             | 0.0024                  | 0.0021                  | 0.0026                  | 1.8422                 |        |
|           |           | 200,50,50       | 0.6079             | 0.5884             | 0.7367             | 0.0039                  | 0.0045                  | 0.0055                  | 1.9330                 |        |
| Youden    | Logistic  | 30,30,30        | 0.6438             | 0.4766             | 0.8451             | 0.0223                  | 0.0323                  | 0.0121                  | 1.9655                 |        |
|           |           | 50,50,50        | 0.6262             | 0.4614             | 0.8287             | 0.0163                  | 0.0254                  | 0.0097                  | 1.9163                 |        |
|           |           | 100,100,100     | 0.6197             | 0.4260             | 0.8293             | 0.0100                  | 0.0172                  | 0.0067                  | 1.8751                 |        |
|           |           | 200,200,200     | 0.6123             | 0.4020             | 0.8286             | 0.0073                  | 0.0118                  | 0.0042                  | 1.8430                 |        |
|           |           | 200,50,50       | 0.6414             | 0.4190             | 0.8250             | 0.0094                  | 0.0226                  | 0.0101                  | 1.8853                 |        |
|           | Yan       | 30,30,30        | 0.6423             | 0.4747             | 0.8005             | 0.0257                  | 0.0372                  | 0.0109                  | 1.9175                 |        |
|           |           | 50,50,50        | 0.6294             | 0.4440             | 0.8041             | 0.0174                  | 0.0239                  | 0.0069                  | 1.8775                 |        |
|           |           | 100,100,100     | 0.6229             | 0.4113             | 0.8107             | 0.0088                  | 0.0131                  | 0.0032                  | 1.8449                 |        |
|           |           | 200,200,200     | 0.6152             | 0.3934             | 0.8131             | 0.0052                  | 0.0071                  | 0.0017                  | 1.8217                 |        |
|           |           | 200,50,50       | 0.6082             | 0.4499             | 0.8040             | 0.0095                  | 0.0189                  | 0.0065                  | 1.8620                 |        |
| Box-Cox   | Euclidean | 30,30,30        | 0.6191             | 0.4401             | 0.8170             | 0.0124                  | 0.0194                  | 0.0052                  | 1.8762                 |        |
|           |           | 50,50,50        | 0.6072             | 0.4290             | 0.8196             | 0.0075                  | 0.0120                  | 0.0025                  | 1.8558                 |        |
|           |           | 100,100,100     | 0.6113             | 0.4167             | 0.8212             | 0.0035                  | 0.0063                  | 0.0011                  | 1.8492                 |        |
|           |           | 200,200,200     | 0.6101             | 0.4085             | 0.8212             | 0.0018                  | 0.0030                  | 0.0006                  | 1.8398                 |        |
|           |           | 200,50,50       | 0.6035             | 0.4252             | 0.8213             | 0.0032                  | 0.0110                  | 0.0024                  | 1.8500                 |        |
|           | Stepwise  | 30,30,30        | 0.6615             | 0.5473             | 0.8500             | 0.0187                  | 0.0239                  | 0.0105                  | 2.0588                 |        |
|           |           | 50,50,50        | 0.6400             | 0.5009             | 0.8469             | 0.0150                  | 0.0193                  | 0.0073                  | 1.9878                 |        |
|           |           | 100,100,100     | 0.6251             | 0.4574             | 0.8401             | 0.0103                  | 0.0147                  | 0.0050                  | 1.9225                 |        |
|           |           | 200,200,200     | 0.6143             | 0.4258             | 0.8338             | 0.0072                  | 0.0096                  | 0.0034                  | 1.8739                 |        |
|           |           | 200,50,50       | 0.6118             | 0.5066             | 0.8461             | 0.0108                  | 0.0168                  | 0.0074                  | 1.9645                 |        |

**Table C.5**

The table provides results based on training data for the lognormal scenarios with  $\rho = 0.5I + 0.5J$ . The table provides the point estimate and variance for  $TCR_1$ ,  $TCR_2$ , and  $TCR_3$ , as well as the  $Sum(\overline{TCRs})$ .

| Method   | Approach  | $n_1, n_2, n_3$ | $\overline{TCR}_1$ | $\overline{TCR}_2$ | $\overline{TCR}_3$ | $Var(\overline{TCR}_1)$ | $Var(\overline{TCR}_2)$ | $Var(\overline{TCR}_3)$ | $Sum(\overline{TCRs})$ |        |
|----------|-----------|-----------------|--------------------|--------------------|--------------------|-------------------------|-------------------------|-------------------------|------------------------|--------|
| Logistic | Logistic  | 30,30,30        | 0.6096             | 0.5616             | 0.7107             | 0.0114                  | 0.0093                  | 0.0115                  | 1.8819                 |        |
|          |           | 50,50,50        | 0.5926             | 0.5469             | 0.6961             | 0.0079                  | 0.0066                  | 0.0076                  | 1.8356                 |        |
|          |           | 100,100,100     | 0.5803             | 0.5268             | 0.6855             | 0.0046                  | 0.0039                  | 0.0055                  | 1.7926                 |        |
|          |           | 200,200,200     | 0.5667             | 0.5142             | 0.6772             | 0.0029                  | 0.0025                  | 0.0032                  | 1.7582                 |        |
|          |           | 200,50,50       | 0.6020             | 0.5248             | 0.6717             | 0.0052                  | 0.0058                  | 0.0087                  | 1.7985                 |        |
|          | Yan       | 30,30,30        | 0.5983             | 0.5691             | 0.6583             | 0.0084                  | 0.0063                  | 0.0079                  | 1.8258                 |        |
|          |           | 50,50,50        | 0.5825             | 0.5457             | 0.6587             | 0.0053                  | 0.0039                  | 0.0047                  | 1.7869                 |        |
|          |           | 100,100,100     | 0.5728             | 0.5266             | 0.6565             | 0.0024                  | 0.0021                  | 0.0024                  | 1.7560                 |        |
|          |           | 200,200,200     | 0.5646             | 0.5120             | 0.6558             | 0.0016                  | 0.0012                  | 0.0014                  | 1.7323                 |        |
|          |           | 200,50,50       | 0.5681             | 0.5450             | 0.6612             | 0.0027                  | 0.0034                  | 0.0046                  | 1.7743                 |        |
|          | Euclidean | Box-Cox         | 30,30,30           | 0.5738             | 0.5194             | 0.6778                  | 0.0062                  | 0.0082                  | 0.0050                 | 1.7710 |
|          |           |                 | 50,50,50           | 0.5642             | 0.5142             | 0.6800                  | 0.0033                  | 0.0052                  | 0.0027                 | 1.7585 |
|          |           |                 | 100,100,100        | 0.5616             | 0.5111             | 0.6737                  | 0.0017                  | 0.0028                  | 0.0013                 | 1.7464 |
|          |           |                 | 200,200,200        | 0.5591             | 0.5064             | 0.6725                  | 0.0009                  | 0.0013                  | 0.0007                 | 1.7380 |
|          |           |                 | 200,50,50          | 0.5601             | 0.5142             | 0.6766                  | 0.0013                  | 0.0049                  | 0.0027                 | 1.7508 |
| Stepwise |           | 30,30,30        | 0.6387             | 0.6073             | 0.7351             | 0.0083                  | 0.0076                  | 0.0082                  | 1.9811                 |        |
|          |           | 50,50,50        | 0.6178             | 0.5781             | 0.7195             | 0.0063                  | 0.0056                  | 0.0063                  | 1.9154                 |        |
|          |           | 100,100,100     | 0.5935             | 0.5493             | 0.7020             | 0.0036                  | 0.0033                  | 0.0041                  | 1.8447                 |        |
|          |           | 200,200,200     | 0.5788             | 0.5287             | 0.6873             | 0.0026                  | 0.0022                  | 0.0029                  | 1.7948                 |        |
|          |           | 200,50,50       | 0.5977             | 0.5690             | 0.7196             | 0.0043                  | 0.0044                  | 0.0059                  | 1.8863                 |        |
| Youden   |           | Logistic        | 30,30,30           | 0.6336             | 0.4505             | 0.8335                  | 0.0230                  | 0.0336                  | 0.0147                 | 1.9176 |
|          |           |                 | 50,50,50           | 0.6181             | 0.4292             | 0.8212                  | 0.0150                  | 0.0254                  | 0.0106                 | 1.8686 |
|          |           |                 | 100,100,100        | 0.6101             | 0.3925             | 0.8247                  | 0.0106                  | 0.0183                  | 0.0069                 | 1.8273 |
|          |           |                 | 200,200,200        | 0.6055             | 0.3653             | 0.8227                  | 0.0072                  | 0.0126                  | 0.0046                 | 1.7935 |
|          |           |                 | 200,50,50          | 0.6433             | 0.3753             | 0.8152                  | 0.0096                  | 0.0233                  | 0.0124                 | 1.8338 |
|          | Yan       | 30,30,30        | 0.6277             | 0.4572             | 0.7856             | 0.0314                  | 0.0431                  | 0.0153                  | 1.8706                 |        |
|          |           | 50,50,50        | 0.6215             | 0.4173             | 0.7930             | 0.0202                  | 0.0283                  | 0.0082                  | 1.8319                 |        |
|          |           | 100,100,100     | 0.6160             | 0.3774             | 0.8030             | 0.0104                  | 0.0163                  | 0.0039                  | 1.7963                 |        |
|          |           | 200,200,200     | 0.6087             | 0.3578             | 0.8069             | 0.0065                  | 0.0087                  | 0.0020                  | 1.7735                 |        |
|          |           | 200,50,50       | 0.6011             | 0.4167             | 0.7950             | 0.0116                  | 0.0021                  | 0.0079                  | 1.8127                 |        |
|          | Youden    | Box-Cox         | 30,30,30           | 0.5958             | 0.4023             | 0.8107                  | 0.0164                  | 0.0239                  | 0.0072                 | 1.8087 |
|          |           |                 | 50,50,50           | 0.5840             | 0.3880             | 0.8138                  | 0.0039                  | 0.0140                  | 0.0027                 | 1.7859 |
|          |           |                 | 100,100,100        | 0.5898             | 0.3732             | 0.8143                  | 0.0040                  | 0.0072                  | 0.0013                 | 1.7773 |
|          |           |                 | 200,200,200        | 0.5884             | 0.3654             | 0.8154                  | 0.0021                  | 0.0034                  | 0.0007                 | 1.7692 |
|          |           |                 | 200,50,50          | 0.5794             | 0.3856             | 0.8154                  | 0.0043                  | 0.0127                  | 0.0027                 | 1.7805 |
| Stepwise |           | 30,30,30        | 0.6507             | 0.5185             | 0.8445             | 0.0219                  | 0.0275                  | 0.0118                  | 2.0137                 |        |
|          |           | 50,50,50        | 0.6292             | 0.4859             | 0.8310             | 0.0170                  | 0.0213                  | 0.0092                  | 1.9462                 |        |
|          |           | 100,100,100     | 0.6133             | 0.4320             | 0.8323             | 0.0116                  | 0.0151                  | 0.0057                  | 1.8776                 |        |
|          |           | 200,200,200     | 0.6081             | 0.3946             | 0.8266             | 0.0088                  | 0.0112                  | 0.0041                  | 1.8294                 |        |
|          |           | 200,50,50       | 0.6035             | 0.4761             | 0.8418             | 0.0121                  | 0.0187                  | 0.0085                  | 1.9214                 |        |



**Table C.6**

The table provides results based on training data for the lognormal scenarios with  $\rho = 0.3I + 0.7J$ . The table provides the point estimate and variance for  $TCR_1$ ,  $TCR_2$ , and  $TCR_3$ , as well as the  $Sum(\overline{TCRs})$ .

| Method   | Approach  | $n_1, n_2, n_3$ | $\overline{TCR}_1$ | $\overline{TCR}_2$ | $\overline{TCR}_3$ | $Var(\overline{TCR}_1)$ | $Var(\overline{TCR}_2)$ | $Var(\overline{TCR}_3)$ | $Sum(\overline{TCRs})$ |        |
|----------|-----------|-----------------|--------------------|--------------------|--------------------|-------------------------|-------------------------|-------------------------|------------------------|--------|
| Logistic | Logistic  | 30,30,30        | 0.6090             | 0.5522             | 0.6976             | 0.0129                  | 0.0088                  | 0.0135                  | 1.8588                 |        |
|          |           | 50,50,50        | 0.5899             | 0.5394             | 0.6861             | 0.0077                  | 0.0070                  | 0.0079                  | 1.8155                 |        |
|          |           | 100,100,100     | 0.5794             | 0.5154             | 0.6780             | 0.0045                  | 0.0043                  | 0.0054                  | 1.7727                 |        |
|          |           | 200,200,200     | 0.5657             | 0.5049             | 0.6682             | 0.0031                  | 0.0025                  | 0.0036                  | 1.7389                 |        |
|          |           | 200,50,50       | 0.6077             | 0.5130             | 0.6457             | 0.0095                  | 0.0062                  | 0.0103                  | 1.7663                 |        |
|          | Yan       | 30,30,30        | 0.5976             | 0.5580             | 0.6504             | 0.0091                  | 0.0066                  | 0.0082                  | 1.8060                 |        |
|          |           | 50,50,50        | 0.5851             | 0.5359             | 0.6460             | 0.0055                  | 0.0043                  | 0.0052                  | 1.7670                 |        |
|          |           | 100,100,100     | 0.5734             | 0.5160             | 0.6444             | 0.0026                  | 0.0023                  | 0.0026                  | 1.7338                 |        |
|          |           | 200,200,200     | 0.5662             | 0.5010             | 0.6441             | 0.0018                  | 0.0012                  | 0.0016                  | 1.7113                 |        |
|          |           | 200,50,50       |                    |                    |                    |                         |                         |                         |                        |        |
|          | Euclidean | Box-Cox         | 30,30,30           | 0.5642             | 0.5029             | 0.6660                  | 0.0062                  | 0.0086                  | 0.0053                 | 1.7332 |
|          |           |                 | 50,50,50           | 0.5570             | 0.4982             | 0.6679                  | 0.0034                  | 0.0054                  | 0.0029                 | 1.7231 |
|          |           |                 | 100,100,100        | 0.5539             | 0.4928             | 0.6615                  | 0.0017                  | 0.0028                  | 0.0014                 | 1.7082 |
|          |           |                 | 200,200,200        | 0.5512             | 0.4893             | 0.6604                  | 0.0009                  | 0.0014                  | 0.0007                 | 1.7010 |
|          |           |                 | 200,50,50          | 0.5519             | 0.4968             | 0.6655                  | 0.0013                  | 0.0050                  | 0.0028                 | 1.7141 |
| Stepwise |           | 30,30,30        | 0.6379             | 0.5959             | 0.7211             | 0.0093                  | 0.0077                  | 0.0097                  | 1.9549                 |        |
|          |           | 50,50,50        | 0.6158             | 0.5680             | 0.7063             | 0.0065                  | 0.0057                  | 0.0067                  | 1.8901                 |        |
|          |           | 100,100,100     | 0.5957             | 0.5356             | 0.6882             | 0.0044                  | 0.0035                  | 0.0046                  | 1.8196                 |        |
|          |           | 200,200,200     | 0.5814             | 0.5168             | 0.6720             | 0.0030                  | 0.0022                  | 0.0032                  | 1.7702                 |        |
|          |           | 200,50,50       | 0.5940             | 0.5605             | 0.7067             | 0.0047                  | 0.0050                  | 0.0065                  | 1.8613                 |        |
| Youden   |           | Logistic        | 30,30,30           | 0.6337             | 0.4382             | 0.8228                  | 0.0241                  | 0.0338                  | 0.0175                 | 1.8947 |
|          |           |                 | 50,50,50           | 0.6210             | 0.4154             | 0.8138                  | 0.0153                  | 0.0264                  | 0.0123                 | 1.8502 |
|          |           |                 | 100,100,100        | 0.6149             | 0.3697             | 0.8240                  | 0.0103                  | 0.0178                  | 0.0077                 | 1.8085 |
|          |           |                 | 200,200,200        | 0.6049             | 0.3517             | 0.8196                  | 0.0068                  | 0.0122                  | 0.0050                 | 1.7762 |
|          |           |                 | 200,50,50          | 0.6574             | 0.3560             | 0.7903                  | 0.0137                  | 0.0239                  | 0.0155                 | 1.8036 |
|          | Yan       | 30,30,30        | 0.6372             | 0.4314             | 0.7788             | 0.0358                  | 0.0483                  | 0.0199                  | 1.8474                 |        |
|          |           | 50,50,50        | 0.6236             | 0.3926             | 0.7949             | 0.0243                  | 0.0326                  | 0.0098                  | 1.8111                 |        |
|          |           | 100,100,100     | 0.6217             | 0.3541             | 0.8014             | 0.0123                  | 0.0181                  | 0.0047                  | 1.7771                 |        |
|          |           | 200,200,200     | 0.6128             | 0.3350             | 0.8070             | 0.0072                  | 0.0095                  | 0.0022                  | 1.7547                 |        |
|          |           | 200,50,50       | 0.6096             | 0.3913             | 0.7935             | 0.0121                  | 0.0259                  | 0.0096                  | 1.7945                 |        |
|          | Youden    | Box-Cox         | 30,30,30           | 0.5843             | 0.3843             | 0.8099                  | 0.0216                  | 0.0299                  | 0.0092                 | 1.7785 |
|          |           |                 | 50,50,50           | 0.5776             | 0.3629             | 0.8141                  | 0.0114                  | 0.0168                  | 0.0039                 | 1.7546 |
|          |           |                 | 100,100,100        | 0.5825             | 0.3445             | 0.8158                  | 0.0049                  | 0.0079                  | 0.0014                 | 1.7428 |
|          |           |                 | 200,200,200        | 0.5826             | 0.3364             | 0.8171                  | 0.0025                  | 0.0037                  | 0.0007                 | 1.7361 |
|          |           |                 | 200,50,50          | 0.5704             | 0.3604             | 0.8177                  | 0.0062                  | 0.0142                  | 0.0027                 | 1.7485 |
| Stepwise |           | 30,30,30        | 0.6459             | 0.5085             | 0.8364             | 0.0267                  | 0.0285                  | 0.0154                  | 1.9908                 |        |
|          |           | 50,50,50        | 0.6275             | 0.4675             | 0.8286             | 0.0193                  | 0.0218                  | 0.0100                  | 1.9236                 |        |
|          |           | 100,100,100     | 0.6077             | 0.4183             | 0.8272             | 0.0143                  | 0.0156                  | 0.0063                  | 1.8532                 |        |
|          |           | 200,200,200     | 0.6036             | 0.3786             | 0.8246             | 0.0109                  | 0.0124                  | 0.0044                  | 1.8068                 |        |
|          |           | 200,50,50       | 0.5995             | 0.4591             | 0.8391             | 0.0151                  | 0.0197                  | 0.0095                  | 1.8976                 |        |

**Table C.7**

The table provides results for the gamma scenarios with  $\rho = 0.7I + 0.3J$ . The table provides the point estimate and variance for  $TCR_1$ ,  $TCR_2$ , and  $TCR_3$ , as well as the  $Sum(\widehat{TCRs})$ .

| Method    | Approach    | $n_1, n_2, n_3$ | $Var(\widehat{TCR}_1)$ | $Var(\widehat{TCR}_2)$ | $Var(\widehat{TCR}_3)$ | $\widehat{TCR}_1$ | $\widehat{TCR}_2$ | $\widehat{TCR}_3$ | $Sum(\widehat{TCRs})$ |
|-----------|-------------|-----------------|------------------------|------------------------|------------------------|-------------------|-------------------|-------------------|-----------------------|
| Euclidean | Logistic    | 30,30,30        | 0.0077                 | 0.0067                 | 0.0046                 | 0.7020            | 0.6219            | 0.7643            | 2.0883                |
|           |             | 50,50,50        | 0.0056                 | 0.0044                 | 0.0032                 | 0.7072            | 0.6382            | 0.7570            | 2.1024                |
|           |             | 100,100,100     | 0.0035                 | 0.0026                 | 0.0018                 | 0.7116            | 0.6431            | 0.7601            | 2.1148                |
|           |             | 200,200,200     | 0.0020                 | 0.0015                 | 0.0012                 | 0.7108            | 0.6536            | 0.7564            | 2.1208                |
|           |             | 200,50,50       | 0.0038                 | 0.0037                 | 0.0032                 | 0.7417            | 0.6325            | 0.7445            | 2.1187                |
|           | Yan         | 30,30,30        | 0.0035                 | 0.0033                 | 0.0036                 | 0.7366            | 0.6319            | 0.7151            | 2.0836                |
|           |             | 50,50,50        | 0.0019                 | 0.0019                 | 0.0019                 | 0.7397            | 0.6484            | 0.7169            | 2.1050                |
|           |             | 100,100,100     | 0.0010                 | 0.0009                 | 0.0011                 | 0.7413            | 0.6572            | 0.7226            | 2.1211                |
|           |             | 200,200,200     | 0.0006                 | 0.0004                 | 0.0006                 | 0.7392            | 0.6633            | 0.7262            | 2.1287                |
|           |             | 200,50,50       | 0.0011                 | 0.0013                 | 0.0020                 | 0.7450            | 0.6464            | 0.7194            | 2.1109                |
|           | Box-Cox     | 30,30,30        | 0.0025                 | 0.0017                 | 0.0023                 | 0.7064            | 0.6316            | 0.7207            | 2.0588                |
|           |             | 50,50,50        | 0.0015                 | 0.0009                 | 0.0012                 | 0.7091            | 0.6416            | 0.7187            | 2.0694                |
|           |             | 100,100,100     | 0.0007                 | 0.0004                 | 0.0006                 | 0.7117            | 0.6469            | 0.7204            | 2.0790                |
|           |             | 200,200,200     | 0.0004                 | 0.0002                 | 0.0003                 | 0.7127            | 0.6494            | 0.7210            | 2.0830                |
|           |             | 200,50,50       | 0.0007                 | 0.0006                 | 0.0012                 | 0.7129            | 0.6421            | 0.7189            | 2.0739                |
| Stepwise  |             | 30,30,30        | 0.0076                 | 0.0071                 | 0.0063                 | 0.7080            | 0.6057            | 0.7421            | 2.0558                |
|           |             | 50,50,50        | 0.0048                 | 0.0040                 | 0.0033                 | 0.7172            | 0.6291            | 0.7391            | 2.0855                |
|           |             | 100,100,100     | 0.0027                 | 0.0025                 | 0.0024                 | 0.7211            | 0.6442            | 0.7412            | 2.1065                |
|           |             | 200,200,200     | 0.0019                 | 0.0014                 | 0.0014                 | 0.7207            | 0.6567            | 0.7406            | 2.1180                |
|           |             | 200,50,50       | 0.0031                 | 0.0040                 | 0.0038                 | 0.7420            | 0.6157            | 0.7388            | 2.0965                |
| Youden    | Logistic    | 30,30,30        | 0.0156                 | 0.0176                 | 0.0051                 | 0.7012            | 0.5618            | 0.8052            | 2.0682                |
|           |             | 50,50,50        | 0.0115                 | 0.0129                 | 0.0037                 | 0.7246            | 0.5698            | 0.7973            | 2.0917                |
|           |             | 100,100,100     | 0.0065                 | 0.0084                 | 0.0023                 | 0.7374            | 0.5706            | 0.8022            | 2.1103                |
|           |             | 200,200,200     | 0.0044                 | 0.0058                 | 0.0017                 | 0.7441            | 0.5778            | 0.7982            | 2.1202                |
|           |             | 200,50,50       | 0.0065                 | 0.0108                 | 0.0044                 | 0.7711            | 0.5540            | 0.7818            | 2.1068                |
|           | Yan         | 30,30,30        | 0.0053                 | 0.0068                 | 0.0052                 | 0.7891            | 0.5553            | 0.7323            | 2.0767                |
|           |             | 50,50,50        | 0.0034                 | 0.0048                 | 0.0029                 | 0.7963            | 0.5674            | 0.7387            | 2.1024                |
|           |             | 100,100,100     | 0.0019                 | 0.0026                 | 0.0017                 | 0.7989            | 0.5746            | 0.7493            | 2.1229                |
|           |             | 200,200,200     | 0.0012                 | 0.0015                 | 0.0009                 | 0.7958            | 0.5830            | 0.7545            | 2.1333                |
|           |             | 200,50,50       | 0.0019                 | 0.0029                 | 0.0030                 | 0.8003            | 0.5674            | 0.7434            | 2.1111                |
| Box-Cox   | 30,30,30    | 0.0033          | 0.0028                 | 0.0028                 | 0.7442                 | 0.5642            | 0.7545            | 2.0630            |                       |
|           | 50,50,50    | 0.0018          | 0.0016                 | 0.0015                 | 0.7514                 | 0.5678            | 0.7567            | 2.0759            |                       |
|           | 100,100,100 | 0.0009          | 0.0008                 | 0.0007                 | 0.7579                 | 0.5691            | 0.7596            | 2.0865            |                       |
|           | 200,200,200 | 0.0004          | 0.0004                 | 0.0004                 | 0.7603                 | 0.5701            | 0.7606            | 2.0911            |                       |
|           | 200,50,50   | 0.0010          | 0.0010                 | 0.0014                 | 0.7551                 | 0.5692            | 0.7565            | 2.0808            |                       |
|           | Stepwise    | 30,30,30        | 0.0133                 | 0.0164                 | 0.0096                 | 0.7256            | 0.5479            | 0.7621            | 2.0355                |
|           |             | 50,50,50        | 0.0096                 | 0.0111                 | 0.0059                 | 0.7401            | 0.5681            | 0.7628            | 2.0710                |
|           |             | 100,100,100     | 0.0055                 | 0.0076                 | 0.0039                 | 0.7575            | 0.5712            | 0.7722            | 2.1009                |
|           |             | 200,200,200     | 0.0040                 | 0.0051                 | 0.0022                 | 0.7607            | 0.5835            | 0.7733            | 2.1175                |
|           |             | 200,50,50       | 0.0066                 | 0.0096                 | 0.0060                 | 0.7676            | 0.5483            | 0.7691            | 2.0850                |

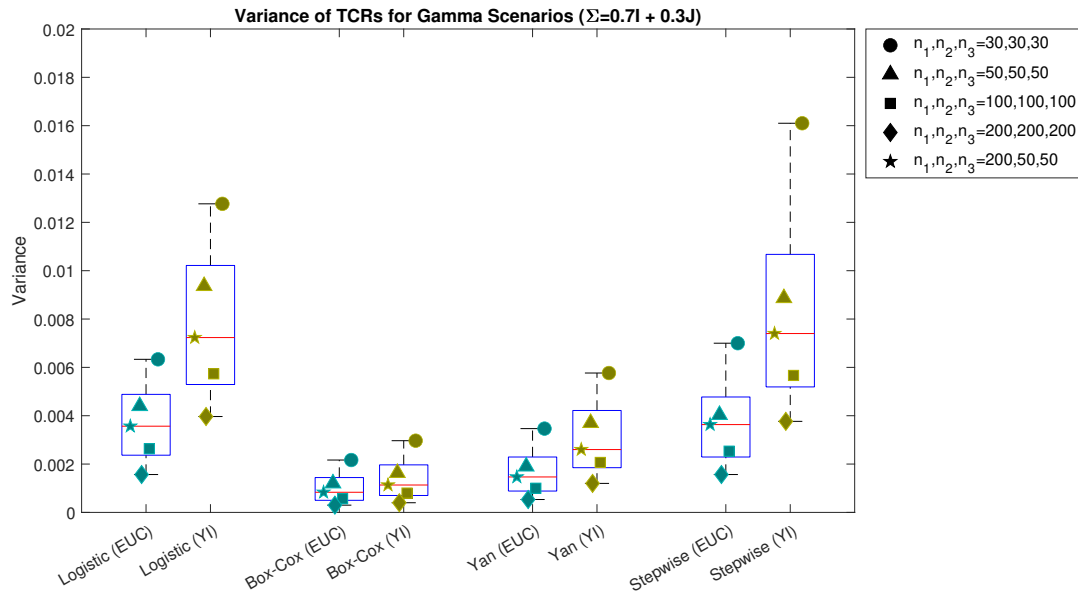

Figure 11: The plot displays the average of the variances of  $\widehat{TCR}_1$ ,  $\widehat{TCR}_2$ , and  $\widehat{TCR}_3$  for each sample size explored. For all explored scenarios, the Euclidean method had smaller variances for the  $\widehat{TCR}$ s than the Youden index.

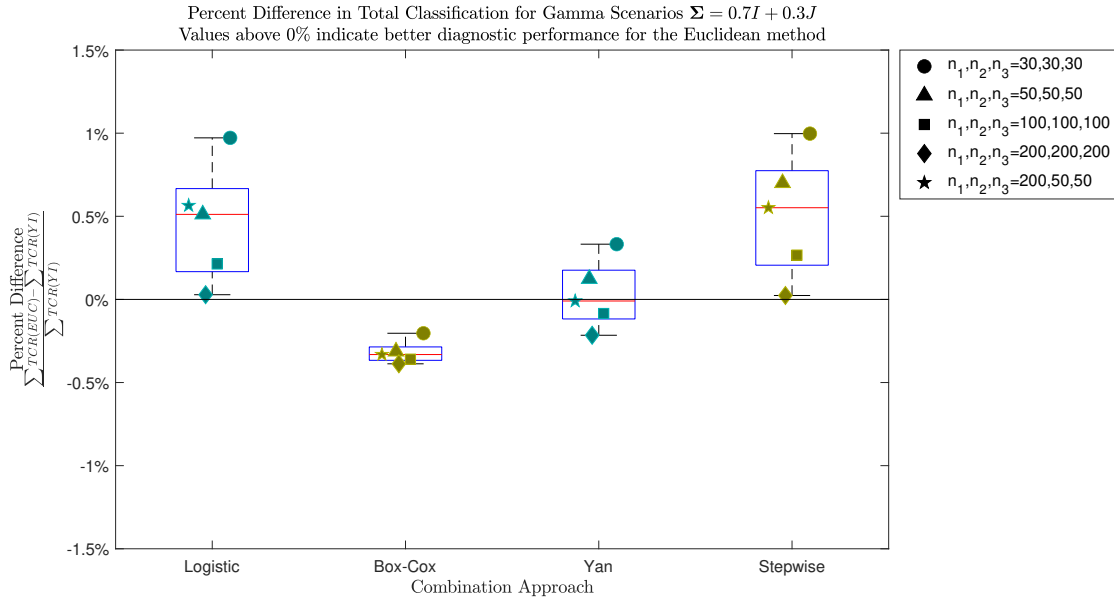

Figure 12: The plot displays the percent difference in  $\sum_i TCR_i$ ,  $i = 1, 2, 3$ , i.e. total classification, for the Euclidean method (EUC) versus the Youden index (YI) for each of the combination approaches and sample sizes, where  $\Sigma = 0.7I + 0.3J$ . The percent difference is calculated by  $\frac{\sum TCR(EUC) - \sum TCR(YI)}{\sum TCR(YI)}$ . Values above 0% correspond to a higher total classification for the Euclidean method than the Youden index, indicating better diagnostic performance for the Euclidean method. Both the logistic regression approach and the stepwise procedure saw higher total classification for the Euclidean method for all scenarios. Yan's method saw higher total classification when the sample size was 30 for each group, and when it was 50 for each group. The Box-Cox approach saw less than a 0.5% difference in total classification between the methods.

**Table C.8**

The table provides results for the gamma scenarios with  $\rho = 0.5I + 0.5J$ . The table provides the point estimate and variance for  $TCR_1$ ,  $TCR_2$ , and  $TCR_3$ , as well as the  $Sum(\widehat{TCR}_s)$ .

| Method    | Approach    | $n_1, n_2, n_3$ | $Var(\widehat{TCR}_1)$ | $Var(\widehat{TCR}_2)$ | $Var(\widehat{TCR}_3)$ | $\widehat{TCR}_1$ | $\widehat{TCR}_2$ | $\widehat{TCR}_3$ | $Sum(\widehat{TCR}_s)$ |
|-----------|-------------|-----------------|------------------------|------------------------|------------------------|-------------------|-------------------|-------------------|------------------------|
| Euclidean | Logistic    | 30,30,30        | 0.0093                 | 0.0078                 | 0.0054                 | 0.6667            | 0.5865            | 0.7399            | 1.9932                 |
|           |             | 50,50,50        | 0.0068                 | 0.0053                 | 0.0031                 | 0.6733            | 0.6024            | 0.7349            | 2.0106                 |
|           |             | 100,100,100     | 0.0040                 | 0.0031                 | 0.0024                 | 0.6739            | 0.6114            | 0.7337            | 2.0190                 |
|           |             | 200,200,200     | 0.0025                 | 0.0018                 | 0.0015                 | 0.6751            | 0.6183            | 0.7330            | 2.0264                 |
|           |             | 200,50,50       | 0.0028                 | 0.0040                 | 0.0031                 | 0.7053            | 0.6101            | 0.7202            | 2.0356                 |
|           | Yan         | 30,30,30        | 0.0037                 | 0.0037                 | 0.0043                 | 0.7199            | 0.5993            | 0.6781            | 1.9973                 |
|           |             | 50,50,50        | 0.0022                 | 0.0021                 | 0.0022                 | 0.7231            | 0.6166            | 0.6788            | 2.0184                 |
|           |             | 100,100,100     | 0.0011                 | 0.0010                 | 0.0013                 | 0.7235            | 0.6277            | 0.6858            | 2.0369                 |
|           |             | 200,200,200     | 0.0006                 | 0.0005                 | 0.0007                 | 0.7201            | 0.6344            | 0.6905            | 2.0450                 |
|           |             | 200,50,50       | 0.0011                 | 0.0014                 | 0.0023                 | 0.7273            | 0.6167            | 0.6822            | 2.0262                 |
|           | Box-Cox     | 30,30,30        | 0.0029                 | 0.0016                 | 0.0027                 | 0.6836            | 0.6032            | 0.6921            | 1.9790                 |
|           |             | 50,50,50        | 0.0017                 | 0.0009                 | 0.0014                 | 0.6866            | 0.6136            | 0.6891            | 1.9894                 |
|           |             | 100,100,100     | 0.0008                 | 0.0005                 | 0.0007                 | 0.6891            | 0.6184            | 0.6908            | 1.9984                 |
|           |             | 200,200,200     | 0.0004                 | 0.0002                 | 0.0004                 | 0.6900            | 0.6208            | 0.6916            | 2.0023                 |
|           |             | 200,50,50       | 0.0009                 | 0.0007                 | 0.0013                 | 0.6898            | 0.6135            | 0.6898            | 1.9931                 |
| Stepwise  |             | 30,30,30        | 0.0081                 | 0.0080                 | 0.0076                 | 0.6862            | 0.5799            | 0.7106            | 1.9767                 |
|           |             | 50,50,50        | 0.0056                 | 0.0050                 | 0.0043                 | 0.6950            | 0.6025            | 0.7060            | 2.0035                 |
|           |             | 100,100,100     | 0.0034                 | 0.0029                 | 0.0029                 | 0.7020            | 0.6181            | 0.7065            | 2.0266                 |
|           |             | 200,200,200     | 0.0020                 | 0.0017                 | 0.0017                 | 0.7044            | 0.6275            | 0.7056            | 2.0375                 |
|           |             | 200,50,50       | 0.0034                 | 0.0041                 | 0.0046                 | 0.7223            | 0.5882            | 0.7041            | 2.0146                 |
| Youden    | Logistic    | 30,30,30        | 0.0201                 | 0.0215                 | 0.0060                 | 0.6730            | 0.5133            | 0.7876            | 1.9740                 |
|           |             | 50,50,50        | 0.0153                 | 0.0169                 | 0.0039                 | 0.6893            | 0.5283            | 0.7808            | 1.9984                 |
|           |             | 100,100,100     | 0.0089                 | 0.0110                 | 0.0031                 | 0.7016            | 0.5301            | 0.7830            | 2.0147                 |
|           |             | 200,200,200     | 0.0062                 | 0.0079                 | 0.0020                 | 0.7138            | 0.5322            | 0.7799            | 2.0260                 |
|           |             | 200,50,50       | 0.0079                 | 0.0126                 | 0.0055                 | 0.7491            | 0.5239            | 0.7487            | 2.0216                 |
|           | Yan         | 30,30,30        | 0.0057                 | 0.0086                 | 0.0071                 | 0.7804            | 0.5171            | 0.6914            | 1.9889                 |
|           |             | 50,50,50        | 0.0042                 | 0.0060                 | 0.0038                 | 0.7835            | 0.5302            | 0.6992            | 2.0129                 |
|           |             | 100,100,100     | 0.0022                 | 0.0031                 | 0.0023                 | 0.7860            | 0.5417            | 0.7078            | 2.0355                 |
|           |             | 200,200,200     | 0.0014                 | 0.0017                 | 0.0013                 | 0.7806            | 0.5510            | 0.7156            | 2.0472                 |
|           |             | 200,50,50       | 0.0022                 | 0.0035                 | 0.0040                 | 0.7888            | 0.5337            | 0.7012            | 2.0237                 |
| Box-Cox   | 30,30,30    | 0.0045          | 0.0040                 | 0.0046                 | 0.7256                 | 0.5291            | 0.7262            | 1.9809            |                        |
|           | 50,50,50    | 0.0025          | 0.0024                 | 0.0024                 | 0.7341                 | 0.5325            | 0.7286            | 1.9952            |                        |
|           | 100,100,100 | 0.0011          | 0.0011                 | 0.0011                 | 0.7414                 | 0.5321            | 0.7324            | 2.0058            |                        |
|           | 200,200,200 | 0.0006          | 0.0006                 | 0.0006                 | 0.7436                 | 0.5332            | 0.7337            | 2.0105            |                        |
|           | 200,50,50   | 0.0013          | 0.0016                 | 0.0021                 | 0.7373                 | 0.5335            | 0.7289            | 1.9997            |                        |
|           | Stepwise    | 30,30,30        | 0.0150                 | 0.0201                 | 0.0124                 | 0.7154            | 0.5096            | 0.7326            | 1.9576                 |
|           |             | 50,50,50        | 0.0122                 | 0.0149                 | 0.0080                 | 0.7274            | 0.5295            | 0.7336            | 1.9904                 |
|           |             | 100,100,100     | 0.0072                 | 0.0103                 | 0.0056                 | 0.7435            | 0.5390            | 0.7358            | 2.0183                 |
|           |             | 200,200,200     | 0.0044                 | 0.0061                 | 0.0031                 | 0.7474            | 0.5470            | 0.7417            | 2.0361                 |
|           |             | 200,50,50       | 0.0071                 | 0.0121                 | 0.0074                 | 0.7531            | 0.5214            | 0.7312            | 2.0057                 |

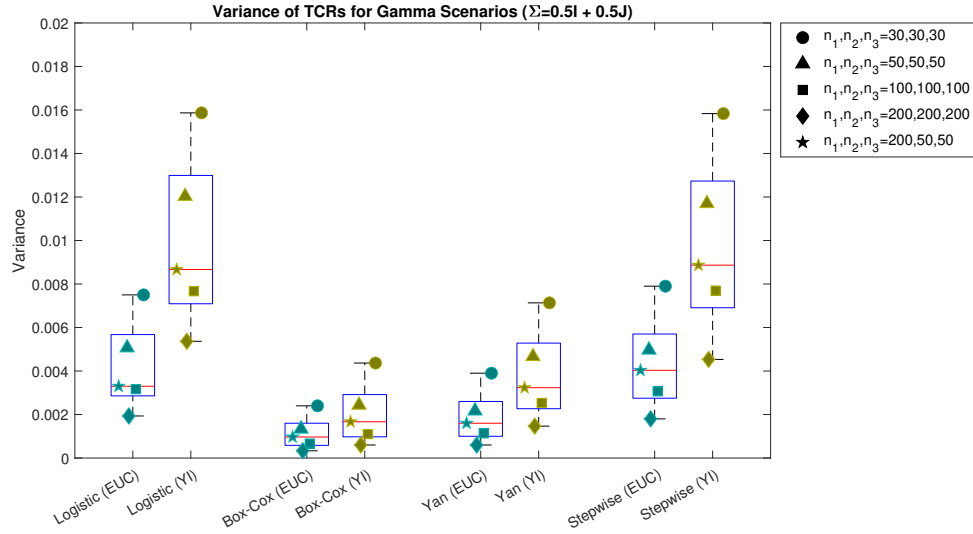

Figure 13: The plot displays the average of the variances of  $\widehat{TCR}_1$ ,  $\widehat{TCR}_2$ , and  $\widehat{TCR}_3$  for each sample size explored. For all explored scenarios, the Euclidean method had smaller variances for the  $\widehat{TCR}$ s than the Youden index.

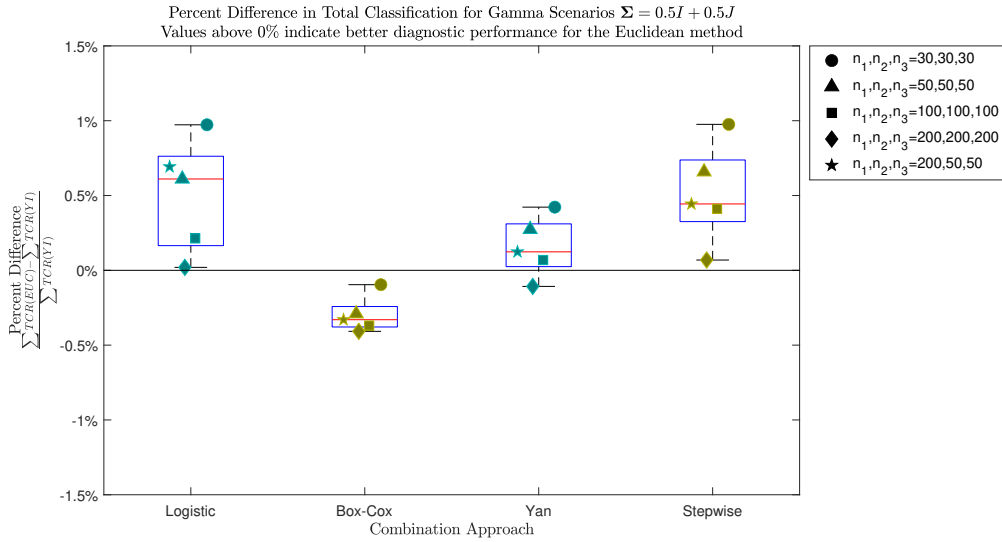

Figure 14: The plot displays the percent difference in  $\sum_i TCR_i$ ,  $i = 1, 2, 3$ , i.e. total classification, for the Euclidean method (EUC) versus the Youden index (YI) for each of the combination approaches and sample sizes, where  $\Sigma = 0.5I + 0.5J$ . The percent difference is calculated by  $\frac{\sum TCR(EUC) - \sum TCR(YI)}{\sum TCR(YI)}$ . Values above 0% correspond to a higher total classification for the Euclidean method than the Youden index, indicating better diagnostic performance for the Euclidean method. For logistic regression and the stepwise procedure, the Euclidean method found higher total classification than the Youden index for all scenarios. For Yan’s method, the Youden had lower total classification than the Euclidean method for all sample sizes except when the sample size was 200 for each group. For the Box-Cox approach, the Youden index had higher total classification for all scenarios, but its performance was poor since the data could not be adequately transformed to normality.

**Table C.9**

The table provides results for the gamma scenarios with  $\rho = 0.3I + 0.7J$ . The table provides the point estimate and variance for  $TCR_1$ ,  $TCR_2$ , and  $TCR_3$ , as well as the  $Sum(\widehat{TCR}_s)$ .

| Method    | Approach    | $n_1, n_2, n_3$ | $Var(\widehat{TCR}_1)$ | $Var(\widehat{TCR}_2)$ | $Var(\widehat{TCR}_3)$ | $\widehat{TCR}_1$ | $\widehat{TCR}_2$ | $\widehat{TCR}_3$ | $Sum(\widehat{TCR}_s)$ |
|-----------|-------------|-----------------|------------------------|------------------------|------------------------|-------------------|-------------------|-------------------|------------------------|
| Euclidean | Logistic    | 30,30,30        | 0.0108                 | 0.0092                 | 0.0054                 | 0.6466            | 0.5629            | 0.7365            | 1.9460                 |
|           |             | 50,50,50        | 0.0077                 | 0.0059                 | 0.0036                 | 0.6484            | 0.5822            | 0.7306            | 1.9613                 |
|           |             | 100,100,100     | 0.0044                 | 0.0036                 | 0.0026                 | 0.6530            | 0.5864            | 0.7294            | 1.9687                 |
|           |             | 200,200,200     | 0.0032                 | 0.0023                 | 0.0017                 | 0.6498            | 0.5958            | 0.7287            | 1.9744                 |
|           |             | 200,50,50       | 0.0048                 | 0.0040                 | 0.0039                 | 0.7063            | 0.5944            | 0.7001            | 2.0009                 |
|           | Yan         | 30,30,30        | 0.0036                 | 0.0038                 | 0.0045                 | 0.7210            | 0.5913            | 0.6607            | 1.9730                 |
|           |             | 50,50,50        | 0.0021                 | 0.0021                 | 0.0024                 | 0.7225            | 0.6080            | 0.6604            | 1.9909                 |
|           |             | 100,100,100     | 0.0012                 | 0.0010                 | 0.0014                 | 0.7219            | 0.6193            | 0.6657            | 2.0069                 |
|           |             | 200,200,200     | 0.0007                 | 0.0005                 | 0.0008                 | 0.7165            | 0.6267            | 0.6722            | 2.0154                 |
|           |             | 200,50,50       | 0.0011                 | 0.0015                 | 0.0023                 | 0.7259            | 0.6084            | 0.6633            | 1.9975                 |
|           | Box-Cox     | 30,30,30        | 0.0033                 | 0.0016                 | 0.0031                 | 0.6778            | 0.5945            | 0.6825            | 1.9548                 |
|           |             | 50,50,50        | 0.0020                 | 0.0009                 | 0.0017                 | 0.6815            | 0.6052            | 0.6786            | 1.9653                 |
|           |             | 100,100,100     | 0.0009                 | 0.0005                 | 0.0009                 | 0.6835            | 0.6096            | 0.6804            | 1.9735                 |
|           |             | 200,200,200     | 0.0005                 | 0.0002                 | 0.0004                 | 0.6842            | 0.6120            | 0.6812            | 1.9775                 |
|           |             | 200,50,50       | 0.0010                 | 0.0007                 | 0.0015                 | 0.6838            | 0.6045            | 0.6798            | 1.9681                 |
| Stepwise  |             | 30,30,30        | 0.0089                 | 0.0087                 | 0.0088                 | 0.6819            | 0.5658            | 0.6937            | 1.9414                 |
|           |             | 50,50,50        | 0.0057                 | 0.0055                 | 0.0054                 | 0.6896            | 0.5932            | 0.6846            | 1.9673                 |
|           |             | 100,100,100     | 0.0037                 | 0.0032                 | 0.0034                 | 0.6970            | 0.6068            | 0.6857            | 1.9895                 |
|           |             | 200,200,200     | 0.0022                 | 0.0018                 | 0.0022                 | 0.6974            | 0.6175            | 0.6869            | 2.0019                 |
|           |             | 200,50,50       | 0.0034                 | 0.0049                 | 0.0054                 | 0.7172            | 0.5763            | 0.6845            | 1.9779                 |
| Logistic  | 30,30,30    | 0.0233          | 0.0249                 | 0.0059                 | 0.6565                 | 0.4818            | 0.7909            | 1.9292            |                        |
|           | 50,50,50    | 0.0176          | 0.0199                 | 0.0044                 | 0.6678                 | 0.4988            | 0.7843            | 1.9509            |                        |
|           | 100,100,100 | 0.0115          | 0.0144                 | 0.0032                 | 0.6841                 | 0.4958            | 0.7857            | 1.9655            |                        |
|           | 200,200,200 | 0.0089          | 0.0103                 | 0.0020                 | 0.6912                 | 0.5006            | 0.7838            | 1.9756            |                        |
|           | 200,50,50   | 0.0089          | 0.0139                 | 0.0061                 | 0.7391                 | 0.5111            | 0.7377            | 1.9880            |                        |
|           | Yan         | 30,30,30        | 0.0054                 | 0.0097                 | 0.0094                 | 0.7831            | 0.5128            | 0.6645            | 1.9604                 |
|           |             | 50,50,50        | 0.0039                 | 0.0060                 | 0.0049                 | 0.7843            | 0.5266            | 0.6731            | 1.9840                 |
|           |             | 100,100,100     | 0.0023                 | 0.0034                 | 0.0030                 | 0.7858            | 0.5358            | 0.6822            | 2.0038                 |
|           |             | 200,200,200     | 0.0015                 | 0.0019                 | 0.0016                 | 0.7760            | 0.5472            | 0.6925            | 2.0157                 |
|           |             | 200,50,50       | 0.0020                 | 0.0038                 | 0.0047                 | 0.7873            | 0.5299            | 0.6762            | 1.9934                 |
| Box-Cox   | 30,30,30    | 0.0062          | 0.0053                 | 0.0072                 | 0.7202                 | 0.5185            | 0.7164            | 1.9551            |                        |
|           | 50,50,50    | 0.0036          | 0.0035                 | 0.0040                 | 0.7303                 | 0.5221            | 0.7173            | 1.9697            |                        |
|           | 100,100,100 | 0.0013          | 0.0014                 | 0.0017                 | 0.7375                 | 0.5197            | 0.7236            | 1.9808            |                        |
|           | 200,200,200 | 0.0007          | 0.0007                 | 0.0008                 | 0.7391                 | 0.5214            | 0.7251            | 1.9856            |                        |
|           | 200,50,50   | 0.0016          | 0.0021                 | 0.0030                 | 0.7327                 | 0.5220            | 0.7197            | 1.9744            |                        |
|           | Stepwise    | 30,30,30        | 0.0175                 | 0.0239                 | 0.0162                 | 0.7112            | 0.4910            | 0.7150            | 1.9171                 |
|           |             | 50,50,50        | 0.0131                 | 0.0186                 | 0.0118                 | 0.7246            | 0.5112            | 0.7144            | 1.9502                 |
|           |             | 100,100,100     | 0.0081                 | 0.0119                 | 0.0074                 | 0.7354            | 0.5293            | 0.7150            | 1.9797                 |
|           |             | 200,200,200     | 0.0051                 | 0.0073                 | 0.0048                 | 0.7377            | 0.5394            | 0.7194            | 1.9965                 |
|           |             | 200,50,50       | 0.0079                 | 0.0150                 | 0.0107                 | 0.7480            | 0.5038            | 0.7134            | 1.9652                 |

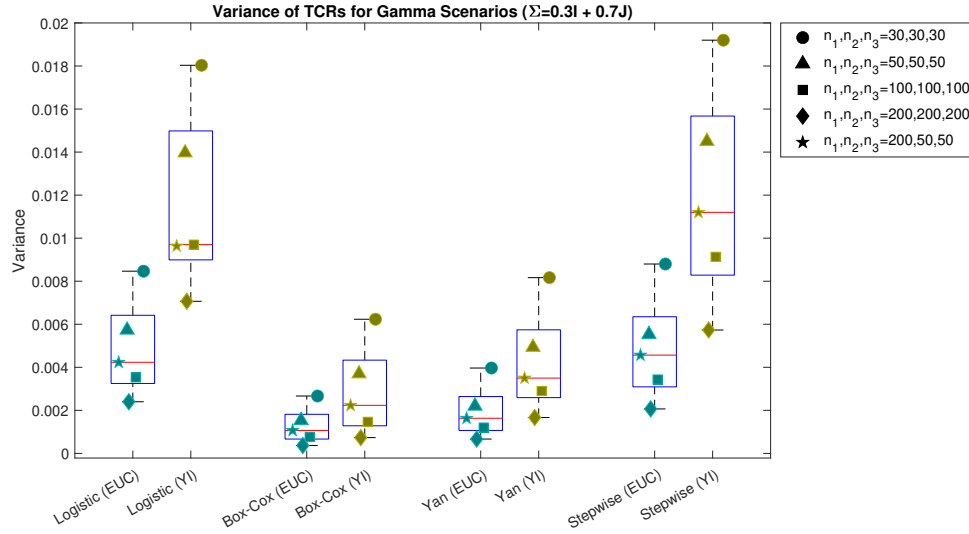

Figure 15: The plot displays the average of the variances of  $\widehat{TCR}_1$ ,  $\widehat{TCR}_2$ , and  $\widehat{TCR}_3$  for each sample size explored. For all explored scenarios, the Euclidean method had smaller variances for the  $\widehat{TCR}$ s than the Youden index.

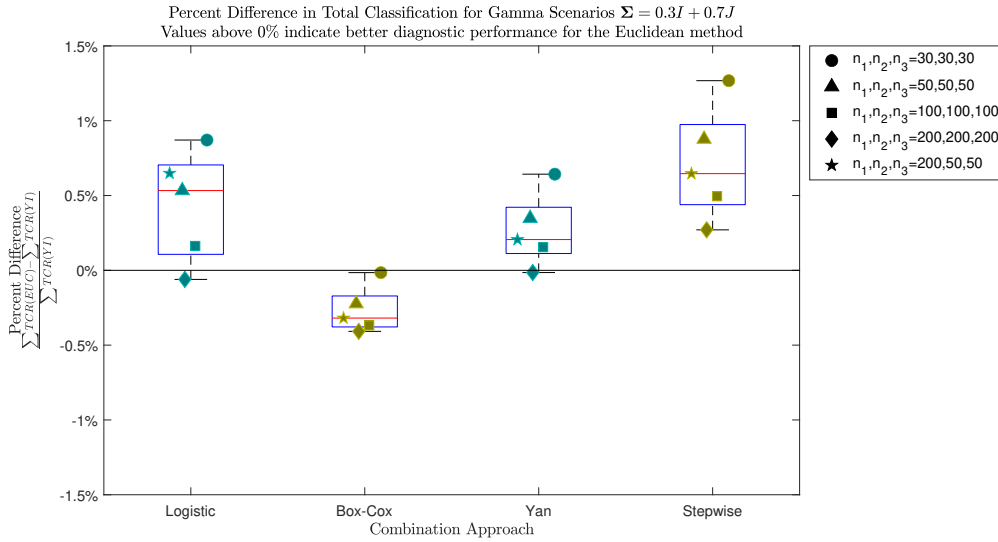

Figure 16: The plot displays the percent difference in  $\sum_i TCR_i$ ,  $i = 1, 2, 3$ , i.e. total classification, for the Euclidean method (EUC) versus the Youden index (YI) for each of the combination approaches and sample sizes, where  $\Sigma = 0.3I + 0.7J$ . The percent difference is calculated by  $\frac{\sum TCR(EUC) - \sum TCR(YI)}{\sum TCR(YI)}$ . Values above 0% correspond to a higher total classification for the Euclidean method than the Youden index, indicating better diagnostic performance for the Euclidean method. For the stepwise procedure, the Euclidean method saw higher total classification than the Youden index for all scenarios. For logistic regression and Yan’s method, the Youden index had lower total classification than the Euclidean method for all scenarios except when the sample size was 200 for each group. For the Box-Cox approach, the Youden index saw higher total classification for all scenarios, but its performance was poor since the data could not adequately be transformed to normality.



**Table C.10**

The table provides results based on training data for the gamma scenarios with  $\rho = 0.7I + 0.3J$ . The table provides the point estimate and variance for  $TCR_1$ ,  $TCR_2$ , and  $TCR_3$ , as well as the  $Sum(\overline{TCRs})$ .

| Method    | Approach    | $n_1, n_2, n_3$ | $\overline{TCR}_1$ | $\overline{TCR}_2$ | $\overline{TCR}_3$ | $Var(\overline{TCR}_1)$ | $Var(\overline{TCR}_2)$ | $Var(\overline{TCR}_3)$ | $Sum(\overline{TCRs})$ |
|-----------|-------------|-----------------|--------------------|--------------------|--------------------|-------------------------|-------------------------|-------------------------|------------------------|
| Euclidean | Logistic    | 30,30,30        | 0.7563             | 0.7167             | 0.7971             | 0.0067                  | 0.0059                  | 0.0050                  | 2.2701                 |
|           |             | 50,50,50        | 0.7472             | 0.7036             | 0.7864             | 0.0054                  | 0.0043                  | 0.0037                  | 2.2372                 |
|           |             | 100,100,100     | 0.7376             | 0.6857             | 0.7760             | 0.0030                  | 0.0026                  | 0.0021                  | 2.1993                 |
|           |             | 200,200,200     | 0.7279             | 0.6788             | 0.7669             | 0.0019                  | 0.0015                  | 0.0014                  | 2.1736                 |
|           |             | 200,50,50       | 0.7554             | 0.7037             | 0.7713             | 0.0034                  | 0.0035                  | 0.0036                  | 2.2304                 |
|           | Yan         | 30,30,30        | 0.7782             | 0.7003             | 0.7329             | 0.0030                  | 0.0050                  | 0.0054                  | 2.2113                 |
|           |             | 50,50,50        | 0.7684             | 0.6903             | 0.7336             | 0.0019                  | 0.0034                  | 0.0032                  | 2.1923                 |
|           |             | 100,100,100     | 0.7581             | 0.6800             | 0.7283             | 0.0011                  | 0.0017                  | 0.0017                  | 2.1665                 |
|           |             | 200,200,200     | 0.7504             | 0.6754             | 0.7288             | 0.0006                  | 0.0008                  | 0.0008                  | 2.1546                 |
|           |             | 200,50,50       | 0.7553             | 0.6892             | 0.7330             | 0.0011                  | 0.0028                  | 0.0031                  | 2.1775                 |
|           | Box-Cox     | 30,30,30        | 0.7193             | 0.6658             | 0.7312             | 0.0045                  | 0.0059                  | 0.0041                  | 2.1163                 |
|           |             | 50,50,50        | 0.7161             | 0.6587             | 0.7298             | 0.0025                  | 0.0040                  | 0.0023                  | 2.1045                 |
|           |             | 100,100,100     | 0.7164             | 0.6549             | 0.7241             | 0.0013                  | 0.0019                  | 0.0013                  | 2.0953                 |
|           |             | 200,200,200     | 0.7164             | 0.6526             | 0.7218             | 0.0006                  | 0.0010                  | 0.0006                  | 2.0907                 |
|           |             | 200,50,50       | 0.7168             | 0.6578             | 0.7266             | 0.0010                  | 0.0035                  | 0.0027                  | 2.1012                 |
| Stepwise  |             | 30,30,30        | 0.7855             | 0.7463             | 0.7994             | 0.0048                  | 0.0049                  | 0.0046                  | 2.3312                 |
|           |             | 50,50,50        | 0.7731             | 0.7265             | 0.7865             | 0.0034                  | 0.0033                  | 0.0032                  | 2.2861                 |
|           |             | 100,100,100     | 0.7575             | 0.7065             | 0.7690             | 0.0022                  | 0.0023                  | 0.0023                  | 2.2330                 |
|           |             | 200,200,200     | 0.7459             | 0.6955             | 0.7577             | 0.0015                  | 0.0013                  | 0.0013                  | 2.1990                 |
|           |             | 200,50,50       | 0.7613             | 0.7217             | 0.7854             | 0.0026                  | 0.0027                  | 0.0031                  | 2.2684                 |
| Youden    | Logistic    | 30,30,30        | 0.7703             | 0.6712             | 0.8476             | 0.0142                  | 0.0204                  | 0.0063                  | 2.2891                 |
|           |             | 50,50,50        | 0.7729             | 0.6487             | 0.8324             | 0.0109                  | 0.0150                  | 0.0049                  | 2.2541                 |
|           |             | 100,100,100     | 0.7682             | 0.6226             | 0.8225             | 0.0066                  | 0.0096                  | 0.0028                  | 2.2132                 |
|           |             | 200,200,200     | 0.7647             | 0.6097             | 0.8120             | 0.0044                  | 0.0063                  | 0.0021                  | 2.1864                 |
|           |             | 200,50,50       | 0.7873             | 0.6420             | 0.8147             | 0.0064                  | 0.0117                  | 0.0056                  | 2.2440                 |
|           | Yan         | 30,30,30        | 0.8442             | 0.6337             | 0.7511             | 0.0067                  | 0.0129                  | 0.0086                  | 2.2289                 |
|           |             | 50,50,50        | 0.8338             | 0.6154             | 0.7567             | 0.0042                  | 0.0091                  | 0.0051                  | 2.2059                 |
|           |             | 100,100,100     | 0.8227             | 0.6019             | 0.7553             | 0.0024                  | 0.0050                  | 0.0027                  | 2.1798                 |
|           |             | 200,200,200     | 0.8095             | 0.5974             | 0.7570             | 0.0015                  | 0.0026                  | 0.0013                  | 2.1638                 |
|           |             | 200,50,50       | 0.8136             | 0.6205             | 0.7583             | 0.0021                  | 0.0068                  | 0.0050                  | 2.1925                 |
| Box-Cox   | 30,30,30    | 0.7594          | 0.5974             | 0.7671             | 0.0065             | 0.0125                  | 0.0062                  | 2.1239                  |                        |
|           | 50,50,50    | 0.7607          | 0.5861             | 0.7704             | 0.0037             | 0.0083                  | 0.0032                  | 2.1172                  |                        |
|           | 100,100,100 | 0.7635          | 0.5791             | 0.7636             | 0.0016             | 0.0039                  | 0.0017                  | 2.1062                  |                        |
|           | 200,200,200 | 0.7643          | 0.5747             | 0.7622             | 0.0009             | 0.0020                  | 0.0009                  | 2.1012                  |                        |
|           | 200,50,50   | 0.7595          | 0.5859             | 0.7661             | 0.0014             | 0.0072                  | 0.0038                  | 2.1115                  |                        |
|           | Stepwise    | 30,30,30        | 0.8097             | 0.7000             | 0.8301             | 0.0111                  | 0.0163                  | 0.0090                  | 2.3398                 |
|           |             | 50,50,50        | 0.8032             | 0.6761             | 0.8169             | 0.0087                  | 0.0120                  | 0.0065                  | 2.2963                 |
|           |             | 100,100,100     | 0.7975             | 0.6405             | 0.8060             | 0.0052                  | 0.0085                  | 0.0039                  | 2.2439                 |
|           |             | 200,200,200     | 0.7884             | 0.6270             | 0.7937             | 0.0037                  | 0.0053                  | 0.0024                  | 2.2091                 |
|           |             | 200,50,50       | 0.7880             | 0.6687             | 0.8828             | 0.0062                  | 0.0010                  | 0.0059                  | 2.2796                 |

**Table C.11**

The table provides results based on training data for the gamma scenarios with  $\rho = 0.5I + 0.5J$ . The table provides the point estimate and variance for  $TCR_1$ ,  $TCR_2$ , and  $TCR_3$ , as well as the  $Sum(\overline{TCRs})$ .

| Method    | Approach | $n_1, n_2, n_3$ | $\overline{TCR}_1$ | $\overline{TCR}_2$ | $\overline{TCR}_3$ | $Var(\overline{TCR}_1)$ | $Var(\overline{TCR}_2)$ | $Var(\overline{TCR}_3)$ | $Sum(\overline{TCRs})$ |        |
|-----------|----------|-----------------|--------------------|--------------------|--------------------|-------------------------|-------------------------|-------------------------|------------------------|--------|
| Euclidean | Logistic | 30,30,30        | 0.7230             | 0.6828             | 0.7751             | 0.0081                  | 0.0071                  | 0.0058                  | 2.1810                 |        |
|           |          | 50,50,50        | 0.7151             | 0.6691             | 0.7668             | 0.0062                  | 0.0050                  | 0.0037                  | 2.1510                 |        |
|           |          | 100,100,100     | 0.6999             | 0.6557             | 0.7511             | 0.0036                  | 0.0030                  | 0.0028                  | 2.1068                 |        |
|           |          | 200,200,200     | 0.6925             | 0.6448             | 0.7444             | 0.0025                  | 0.0018                  | 0.0016                  | 2.0817                 |        |
|           |          | 200,50,50       | 0.7180             | 0.6880             | 0.7580             | 0.0021                  | 0.0022                  | 0.0027                  | 2.1640                 |        |
|           | Yan      | 30,30,30        | 0.7632             | 0.6728             | 0.6963             | 0.0034                  | 0.0059                  | 0.0060                  | 2.1323                 |        |
|           |          | 50,50,50        | 0.7549             | 0.6613             | 0.6964             | 0.0023                  | 0.0037                  | 0.0034                  | 2.1125                 |        |
|           |          | 100,100,100     | 0.7405             | 0.6510             | 0.6926             | 0.0012                  | 0.0019                  | 0.0018                  | 2.0842                 |        |
|           |          | 200,200,200     | 0.7310             | 0.6465             | 0.6928             | 0.0007                  | 0.0009                  | 0.0009                  | 2.0704                 |        |
|           |          | 200,50,50       | 0.7381             | 0.6607             | 0.6985             | 0.0011                  | 0.0031                  | 0.0034                  | 2.0974                 |        |
|           | Box-Cox  | Stepwise        | 30,30,30           | 0.6991             | 0.6354             | 0.7020                  | 0.0047                  | 0.0069                  | 0.0046                 | 2.0365 |
|           |          |                 | 50,50,50           | 0.6943             | 0.6314             | 0.6999                  | 0.0028                  | 0.0042                  | 0.0027                 | 2.0257 |
|           |          |                 | 100,100,100        | 0.6943             | 0.6257             | 0.6938                  | 0.0014                  | 0.0021                  | 0.0014                 | 2.0138 |
|           |          |                 | 200,200,200        | 0.6939             | 0.6242             | 0.6928                  | 0.0007                  | 0.0010                  | 0.0007                 | 2.0108 |
|           |          |                 | 200,50,50          | 0.6933             | 0.6295             | 0.7000                  | 0.0011                  | 0.0038                  | 0.0026                 | 2.0228 |
| Logistic  |          | 30,30,30        | 0.7638             | 0.7220             | 0.7707             | 0.0059                  | 0.0055                  | 0.0054                  | 2.2565                 |        |
|           |          | 50,50,50        | 0.7517             | 0.7033             | 0.7564             | 0.0041                  | 0.0038                  | 0.0038                  | 2.2114                 |        |
|           |          | 100,100,100     | 0.7387             | 0.6806             | 0.7365             | 0.0027                  | 0.0025                  | 0.0026                  | 2.1558                 |        |
|           |          | 200,200,200     | 0.7291             | 0.6672             | 0.7242             | 0.0017                  | 0.0015                  | 0.0015                  | 2.1205                 |        |
|           |          | 200,50,50       | 0.7418             | 0.6972             | 0.7547             | 0.0032                  | 0.0033                  | 0.0039                  | 2.1936                 |        |
| Youden    | Logistic | 30,30,30        | 0.7428             | 0.6265             | 0.8323             | 0.0181                  | 0.0242                  | 0.0070                  | 2.2015                 |        |
|           |          | 50,50,50        | 0.7408             | 0.6105             | 0.8189             | 0.0141                  | 0.0197                  | 0.0050                  | 2.1702                 |        |
|           |          | 100,100,100     | 0.7342             | 0.5840             | 0.8048             | 0.0087                  | 0.0130                  | 0.0035                  | 2.1229                 |        |
|           |          | 200,200,200     | 0.7356             | 0.5665             | 0.7947             | 0.0061                  | 0.0087                  | 0.0023                  | 2.0967                 |        |
|           |          | 200,50,50       | 0.7651             | 0.6159             | 0.7851             | 0.0079                  | 0.0138                  | 0.0064                  | 2.1661                 |        |
|           | Yan      | 30,30,30        | 0.8376             | 0.6001             | 0.7124             | 0.0068                  | 0.0154                  | 0.0105                  | 2.1501                 |        |
|           |          | 50,50,50        | 0.8238             | 0.5832             | 0.7186             | 0.0048                  | 0.0104                  | 0.0061                  | 2.1256                 |        |
|           |          | 100,100,100     | 0.8105             | 0.5709             | 0.7158             | 0.0026                  | 0.0055                  | 0.0034                  | 2.0972                 |        |
|           |          | 200,200,200     | 0.7959             | 0.5676             | 0.7196             | 0.0016                  | 0.0029                  | 0.0017                  | 2.0831                 |        |
|           |          | 200,50,50       | 0.8032             | 0.5882             | 0.7204             | 0.0024                  | 0.0085                  | 0.0062                  | 2.1118                 |        |
| Box-Cox   | Stepwise | 30,30,30        | 0.7432             | 0.5643             | 0.7400             | 0.0072                  | 0.0146                  | 0.0078                  | 2.0475                 |        |
|           |          | 50,50,50        | 0.7449             | 0.5505             | 0.7541             | 0.0043                  | 0.0097                  | 0.0041                  | 2.0375                 |        |
|           |          | 100,100,100     | 0.7475             | 0.5410             | 0.7371             | 0.0019                  | 0.0045                  | 0.0021                  | 2.0256                 |        |
|           |          | 200,200,200     | 0.7481             | 0.5373             | 0.7353             | 0.0010                  | 0.0023                  | 0.0011                  | 2.0207                 |        |
|           |          | 200,50,50       | 0.7415             | 0.5514             | 0.7404             | 0.0017                  | 0.0081                  | 0.0043                  | 2.0333                 |        |
|           | Logistic | 30,30,30        | 0.8004             | 0.6645             | 0.8020             | 0.0127                  | 0.0197                  | 0.0116                  | 2.2670                 |        |
|           |          | 50,50,50        | 0.7907             | 0.6425             | 0.7901             | 0.0106                  | 0.0156                  | 0.0083                  | 2.2233                 |        |
|           |          | 100,100,100     | 0.7849             | 0.6111             | 0.7706             | 0.0070                  | 0.0111                  | 0.0056                  | 2.1667                 |        |
|           |          | 200,200,200     | 0.7750             | 0.5928             | 0.7635             | 0.0042                  | 0.0065                  | 0.0033                  | 2.1312                 |        |
|           |          | 200,50,50       | 0.7740             | 0.6425             | 0.7889             | 0.0068                  | 0.0125                  | 0.0073                  | 2.2054                 |        |

**Table C.12**

The table provides results based on training data for the gamma scenarios with  $\rho = 0.3I + 0.7J$ . The table provides the point estimate and variance for  $TCR_1$ ,  $TCR_2$ , and  $TCR_3$ , as well as the  $Sum(\overline{TCRs})$ .

| Method    | Approach    | $n_1, n_2, n_3$ | $\overline{TCR}_1$ | $\overline{TCR}_2$ | $\overline{TCR}_3$ | $Var(\overline{TCR}_1)$ | $Var(\overline{TCR}_2)$ | $Var(\overline{TCR}_3)$ | $Sum(\overline{TCRs})$ |
|-----------|-------------|-----------------|--------------------|--------------------|--------------------|-------------------------|-------------------------|-------------------------|------------------------|
| Euclidean | Logistic    | 30,30,30        | 0.7053             | 0.6613             | 0.7717             | 0.0091                  | 0.0088                  | 0.0058                  | 2.1383                 |
|           |             | 50,50,50        | 0.6921             | 0.6517             | 0.7624             | 0.0069                  | 0.0062                  | 0.0040                  | 2.1061                 |
|           |             | 100,100,100     | 0.6811             | 0.6307             | 0.7472             | 0.0041                  | 0.0037                  | 0.0027                  | 2.0590                 |
|           |             | 200,200,200     | 0.6684             | 0.6239             | 0.7399             | 0.0029                  | 0.0023                  | 0.0017                  | 2.0321                 |
|           |             | 200,50,50       | 0.7205             | 0.6704             | 0.7324             | 0.0047                  | 0.0040                  | 0.0040                  | 2.1233                 |
|           | Yan         | 30,30,30        | 0.7637             | 0.6642             | 0.6797             | 0.0033                  | 0.0062                  | 0.0062                  | 2.1076                 |
|           |             | 50,50,50        | 0.7524             | 0.6538             | 0.6782             | 0.0023                  | 0.0038                  | 0.0034                  | 2.0844                 |
|           |             | 100,100,100     | 0.7388             | 0.6418             | 0.6727             | 0.0012                  | 0.0020                  | 0.0019                  | 2.0532                 |
|           |             | 200,200,200     | 0.7288             | 0.6398             | 0.6746             | 0.0008                  | 0.0010                  | 0.0009                  | 2.0432                 |
|           |             | 200,50,50       | 0.7370             | 0.6534             | 0.6794             | 0.0011                  | 0.0033                  | 0.0035                  | 2.0698                 |
|           | Box-Cox     | 30,30,30        | 0.6898             | 0.6250             | 0.6927             | 0.0047                  | 0.0069                  | 0.0047                  | 2.0075                 |
|           |             | 50,50,50        | 0.6907             | 0.6241             | 0.6917             | 0.0028                  | 0.0043                  | 0.0027                  | 2.0065                 |
|           |             | 100,100,100     | 0.6885             | 0.6166             | 0.6838             | 0.0014                  | 0.0020                  | 0.0014                  | 1.9888                 |
|           |             | 200,200,200     | 0.6882             | 0.6152             | 0.6822             | 0.0007                  | 0.0010                  | 0.0007                  | 1.9856                 |
|           |             | 200,50,50       | 0.6872             | 0.6216             | 0.6886             | 0.0011                  | 0.0039                  | 0.0025                  | 1.9974                 |
| Stepwise  |             | 30,30,30        | 0.7596             | 0.7077             | 0.7536             | 0.0058                  | 0.0061                  | 0.0063                  | 2.2209                 |
|           |             | 50,50,50        | 0.7448             | 0.6948             | 0.7351             | 0.0042                  | 0.0042                  | 0.0046                  | 2.1748                 |
|           |             | 100,100,100     | 0.7338             | 0.6707             | 0.7155             | 0.0030                  | 0.0028                  | 0.0029                  | 2.1200                 |
|           |             | 200,200,200     | 0.7225             | 0.6588             | 0.7057             | 0.0019                  | 0.0016                  | 0.0019                  | 2.0870                 |
|           |             | 200,50,50       | 0.7360             | 0.6857             | 0.7353             | 0.0032                  | 0.0039                  | 0.0040                  | 2.1570                 |
| Logistic  | 30,30,30    | 0.7382          | 0.5982             | 0.8361             | 0.0203             | 0.0303                  | 0.0068                  | 2.1625                  |                        |
|           | 50,50,50    | 0.7221          | 0.5835             | 0.8225             | 0.0162             | 0.0232                  | 0.0051                  | 2.1281                  |                        |
|           | 100,100,100 | 0.7192          | 0.5509             | 0.8082             | 0.0109             | 0.0165                  | 0.0038                  | 2.0783                  |                        |
|           | 200,200,200 | 0.7153          | 0.5368             | 0.7978             | 0.0085             | 0.0111                  | 0.0022                  | 2.0499                  |                        |
|           | 200,50,50   | 0.7558          | 0.6057             | 0.7766             | 0.0088             | 0.0157                  | 0.0073                  | 2.1381                  |                        |
|           | Yan         | 30,30,30        | 0.8402             | 0.5968             | 0.6882             | 0.0063                  | 0.0160                  | 0.0126                  | 2.1252                 |
|           |             | 50,50,50        | 0.8241             | 0.5806             | 0.6928             | 0.0045                  | 0.0105                  | 0.0068                  | 2.0976                 |
|           |             | 100,100,100     | 0.8110             | 0.5650             | 0.6914             | 0.0027                  | 0.0058                  | 0.0039                  | 2.0675                 |
|           |             | 200,200,200     | 0.7926             | 0.5637             | 0.6967             | 0.0018                  | 0.0032                  | 0.0022                  | 2.0530                 |
|           |             | 200,50,50       | 0.8019             | 0.5831             | 0.6975             | 0.0022                  | 0.0086                  | 0.0068                  | 2.0825                 |
| Box-Cox   | 30,30,30    | 0.7390          | 0.5497             | 0.7325             | 0.0081             | 0.0170                  | 0.0097                  | 2.0212                  |                        |
|           | 50,50,50    | 0.7431          | 0.5412             | 0.7333             | 0.0051             | 0.0114                  | 0.0056                  | 2.0175                  |                        |
|           | 100,100,100 | 0.7442          | 0.5269             | 0.7287             | 0.0022             | 0.0051                  | 0.0026                  | 1.9998                  |                        |
|           | 200,200,200 | 0.7436          | 0.5253             | 0.7269             | 0.0011             | 0.0025                  | 0.0013                  | 1.9958                  |                        |
|           | 200,50,50   | 0.7374          | 0.5401             | 0.7317             | 0.0018             | 0.0090                  | 0.0052                  | 2.0092                  |                        |
|           | Stepwise    | 30,30,30        | 0.7967             | 0.6433             | 0.7867             | 0.0140                  | 0.0244                  | 0.0147                  | 2.2267                 |
|           |             | 50,50,50        | 0.7895             | 0.6242             | 0.7711             | 0.0111                  | 0.0190                  | 0.0118                  | 2.1848                 |
|           |             | 100,100,100     | 0.7771             | 0.6013             | 0.7506             | 0.0074                  | 0.0122                  | 0.0072                  | 2.1290                 |
|           |             | 200,200,200     | 0.7661             | 0.5869             | 0.7421             | 0.0047                  | 0.0074                  | 0.0048                  | 2.0951                 |
|           |             | 200,50,50       | 0.7695             | 0.6274             | 0.7714             | 0.0076                  | 0.0153                  | 0.0103                  | 2.1684                 |

**Table C.13**

The table provides results the scenarios generated from: (Group 1, Group2, Group 3): (Lognormal, Gamma, Mixture-normal) distributions. These scenarios were all generated with  $n_1, n_2, n_3 = 50, 50, 50$  and  $\rho = 0.5I + 0.5J$ . The table provides the point estimate and variance for  $TCR_1, TCR_2,$  and  $TCR_3,$  as well as the  $Sum(\widehat{TCRs})$ .

| Train/Test | Method    | Approach | $\widehat{TCR}_1$ | $\widehat{TCR}_2$ | $\widehat{TCR}_3$ | $Var(\widehat{TCR}_1)$ | $Var(\widehat{TCR}_2)$ | $Var(\widehat{TCR}_3)$ | $Sum(\widehat{TCRs})$ |
|------------|-----------|----------|-------------------|-------------------|-------------------|------------------------|------------------------|------------------------|-----------------------|
| Train      | Euclidean | Logistic | 0.7127            | 0.6994            | 0.8833            | 0.0048                 | 0.0043                 | 0.0039                 | 2.2954                |
|            |           | Box-Cox  | 0.6945            | 0.6860            | 0.8555            | 0.0029                 | 0.0036                 | 0.0014                 | 2.2360                |
|            |           | Kernel   | 0.7163            | 0.6746            | 0.8634            | 0.0027                 | 0.0033                 | 0.0020                 | 2.2543                |
|            |           | Stepwise | 0.7371            | 0.7230            | 0.8936            | 0.0035                 | 0.0035                 | 0.0024                 | 2.3536                |
|            | Youden    | Logistic | 0.7115            | 0.6506            | 0.9675            | 0.0105                 | 0.0123                 | 0.0012                 | 2.3297                |
|            |           | Box-Cox  | 0.6997            | 0.6307            | 0.9555            | 0.0044                 | 0.0069                 | 0.0006                 | 2.2860                |
|            |           | Kernel   | 0.7688            | 0.5987            | 0.9645            | 0.0088                 | 0.0147                 | 0.0013                 | 2.3321                |
|            |           | Stepwise | 0.7475            | 0.6660            | 0.9702            | 0.0080                 | 0.0096                 | 0.0009                 | 2.3837                |
| Test       | Euclidean | Logistic | 0.6723            | 0.6360            | 0.8620            | 0.0042                 | 0.0038                 | 0.0055                 | 2.1703                |
|            |           | Box-Cox  | 0.6848            | 0.6696            | 0.8466            | 0.0009                 | 0.0008                 | 0.0017                 | 2.2010                |
|            |           | Kernel   | 0.6810            | 0.6268            | 0.8472            | 0.0015                 | 0.0018                 | 0.0027                 | 2.1549                |
|            |           | Stepwise | 0.5585            | 0.6173            | 0.8606            | 0.0036                 | 0.0038                 | 0.0042                 | 2.1465                |
|            | Youden    | Logistic | 0.6626            | 0.5780            | 0.9485            | 0.0090                 | 0.0093                 | 0.0020                 | 2.1890                |
|            |           | Box-Cox  | 0.6889            | 0.6128            | 0.9497            | 0.0015                 | 0.0012                 | 0.0005                 | 2.2514                |
|            |           | Kernel   | 0.7087            | 0.5131            | 0.9503            | 0.0042                 | 0.0060                 | 0.0016                 | 2.1721                |
|            |           | Stepwise | 0.6743            | 0.5488            | 0.9396            | 0.0067                 | 0.0080                 | 0.0018                 | 2.1627                |
